# Supplementary material for: Acquisition of a side population fraction augments malignant phenotype in ovarian cancer
Source: PubMed Central journal article supplement (PMC6775117; doi:10.1038/s41598-019-50794-w), 2019-10-02
Supplement: 41598_2019_50794_MOESM1_ESM.pdf [file 41598_2019_50794_MOESM1_ESM.pdf]

## Title

Acquisition of a side population fraction augments malignant phenotype in ovarian cancer.

## Authors

Koji Yamanoi<sup>1</sup>, Tsukasa Baba<sup>1</sup>, Kaoru Abiko<sup>1</sup>, Junzo Hamanishi<sup>1</sup>, Ken Yamaguchi<sup>1,2</sup>,  
Ryusuke Murakami<sup>1</sup>, Mana Taki<sup>1</sup>, Yuko Hosoe<sup>1</sup>, Susan K Murphy<sup>3</sup>, Ikuo Konishi<sup>1,2</sup>, Masaki  
Mandai<sup>1</sup>, Noriomi Matsumura<sup>1,4</sup> †

## Affiliations

- 1) Department of Gynecology and Obstetrics, Kyoto University Graduate School of Medicine.
- 2) Department of Obstetrics and Gynecology, National Hospital Organization Kyoto Medical Center.
- 3) Division of Gynecologic Oncology, Department of Obstetrics and Gynecology, Duke University Medical Center.
- 4) Department of Obstetrics and Gynecology, Faculty of Medicine, Kindai University.

† Corresponding Author; Noriomi Matsumura,

Supplementary Figure

Figure. S1

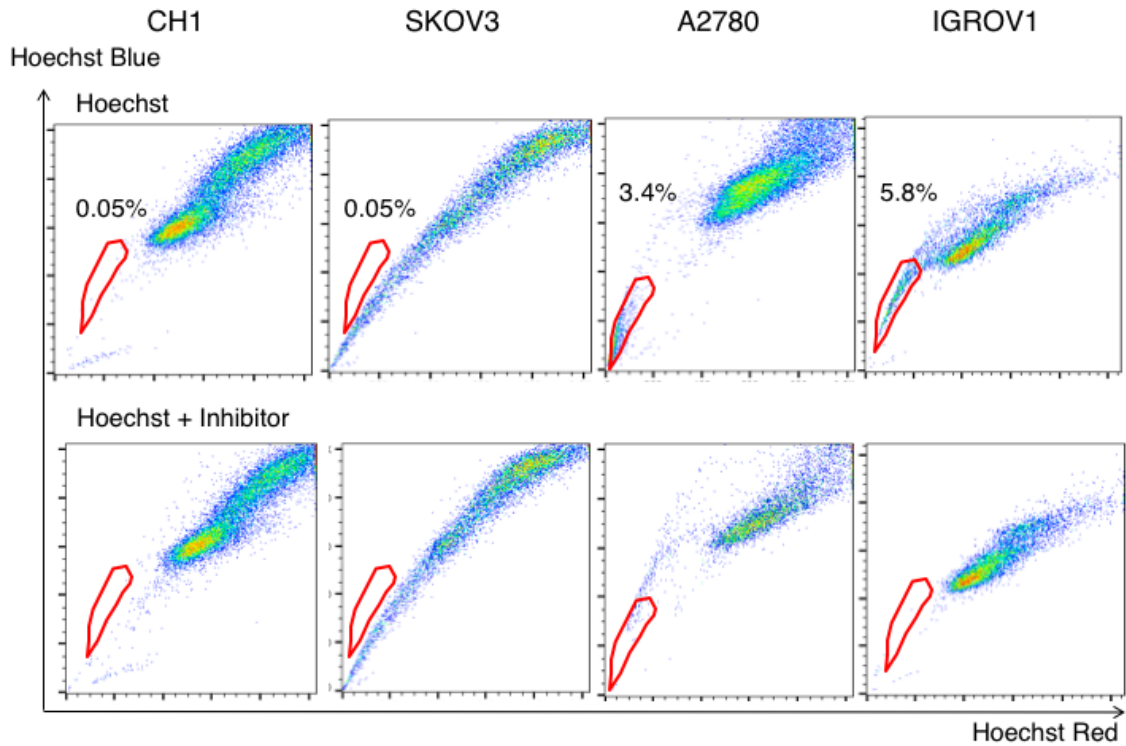

Supplementary Fig. S1. SP fraction of several ovarian cancer cell lines.

Representative data showing the percentage of the SP fraction of CH1, SKOV3, A2780 and IGROV1. SP fraction is marked with red line.

Figure. S2

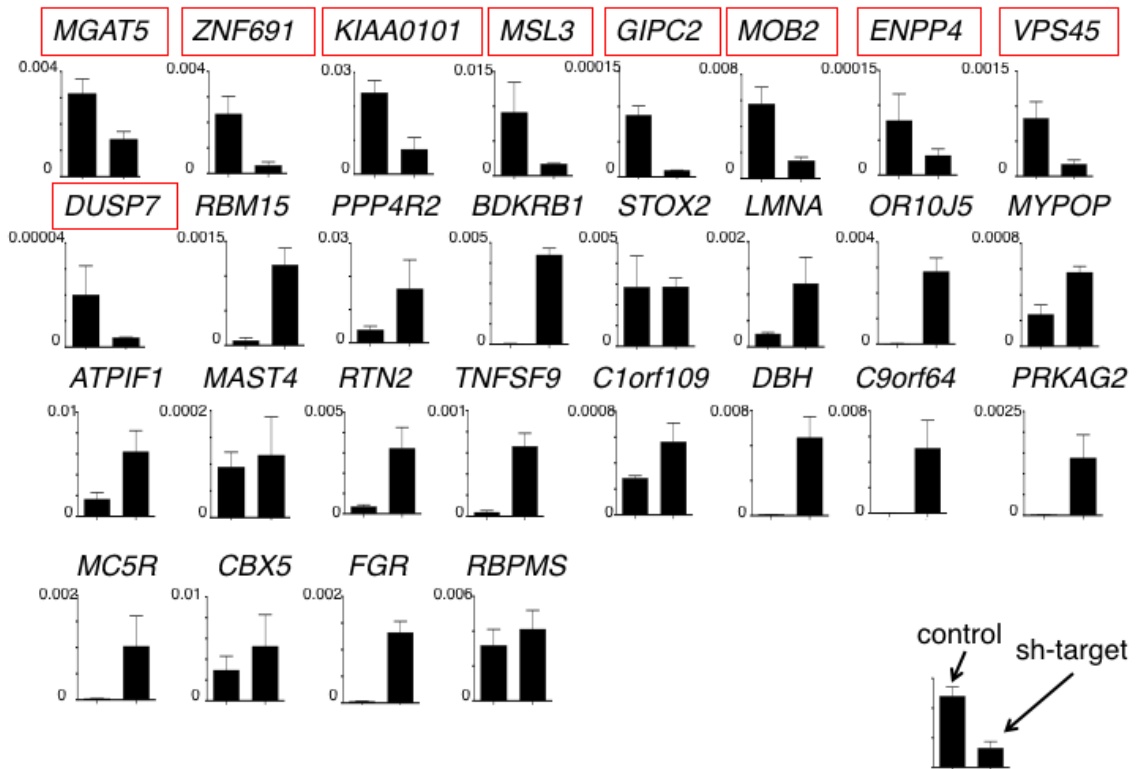

Supplementary Fig. S2. Confirmation of mRNA expression.

RT-PCR showing knockdown of shRNA target genes for the shRNAs that markedly increased the SP fraction in CH1 cells. Red outline indicates that the target gene expression is significantly suppressed.

Figure. S3

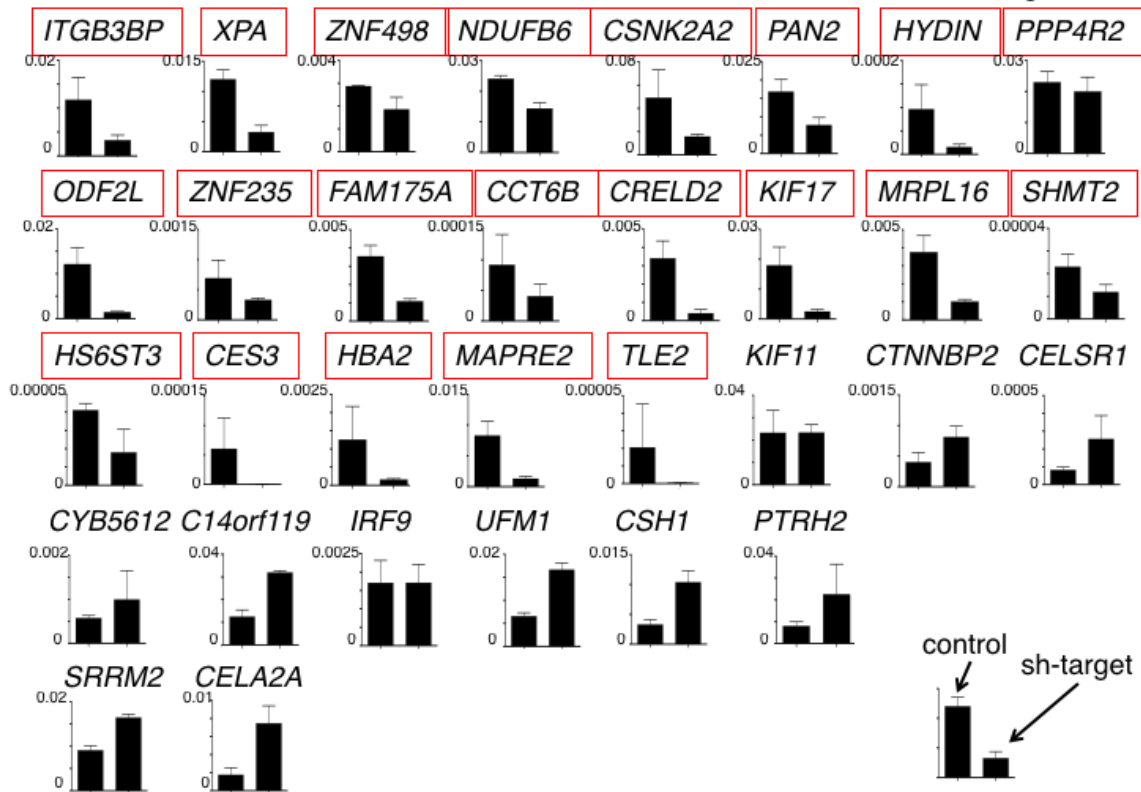

Supplementary Fig. 3. Confirmation of mRNA expression.

RT-PCR showing knockdown of shRNA target genes for the shRNAs that markedly increased the SP fraction in SKOV3 cells. Red outline indicates that target gene expression is significantly suppressed.

Figure. S4

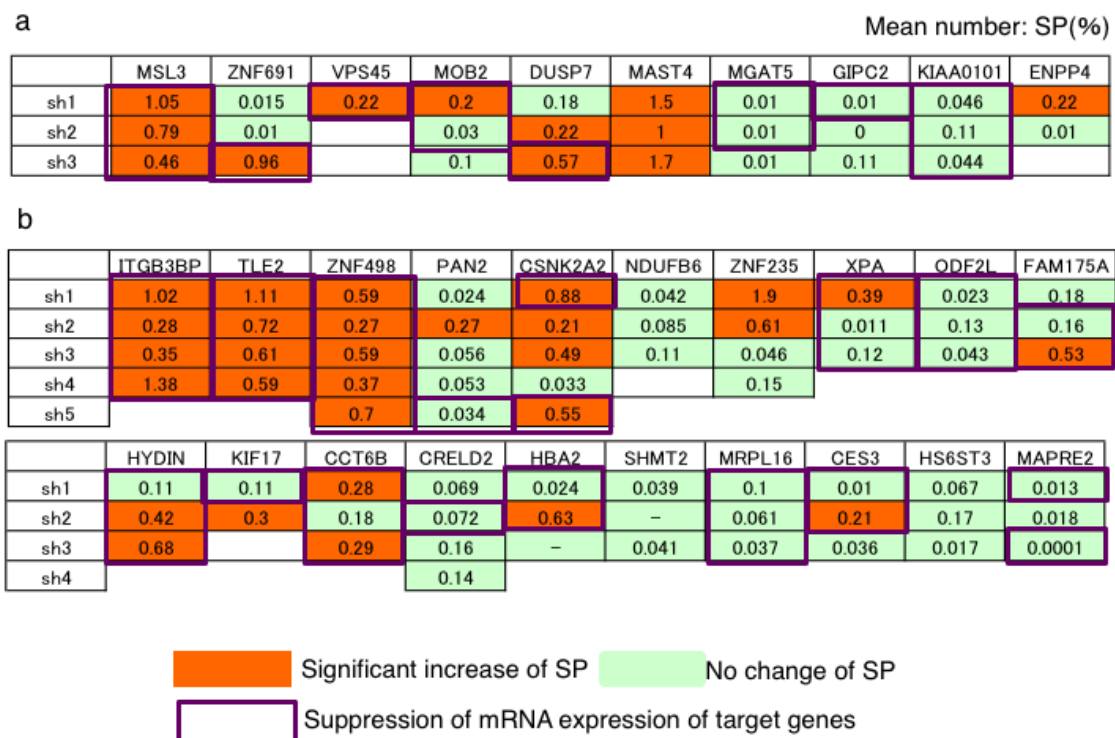

Supplementary Fig. 4. Excluding off target effects and identifying six genes.

We excluded off target effects and identified six genes whose suppression markedly increased the SP fraction. Red shading indicates a significant increase ( $p < 0.05$ ) of SP cells as compared to the controls. The purple outline indicates significant suppression ( $p < 0.05$ ) of mRNA expression as detected by RT-PCR.

a) Analysis using CH1 cells.

b) Analysis using SKOV3 cells.

Figure. S5

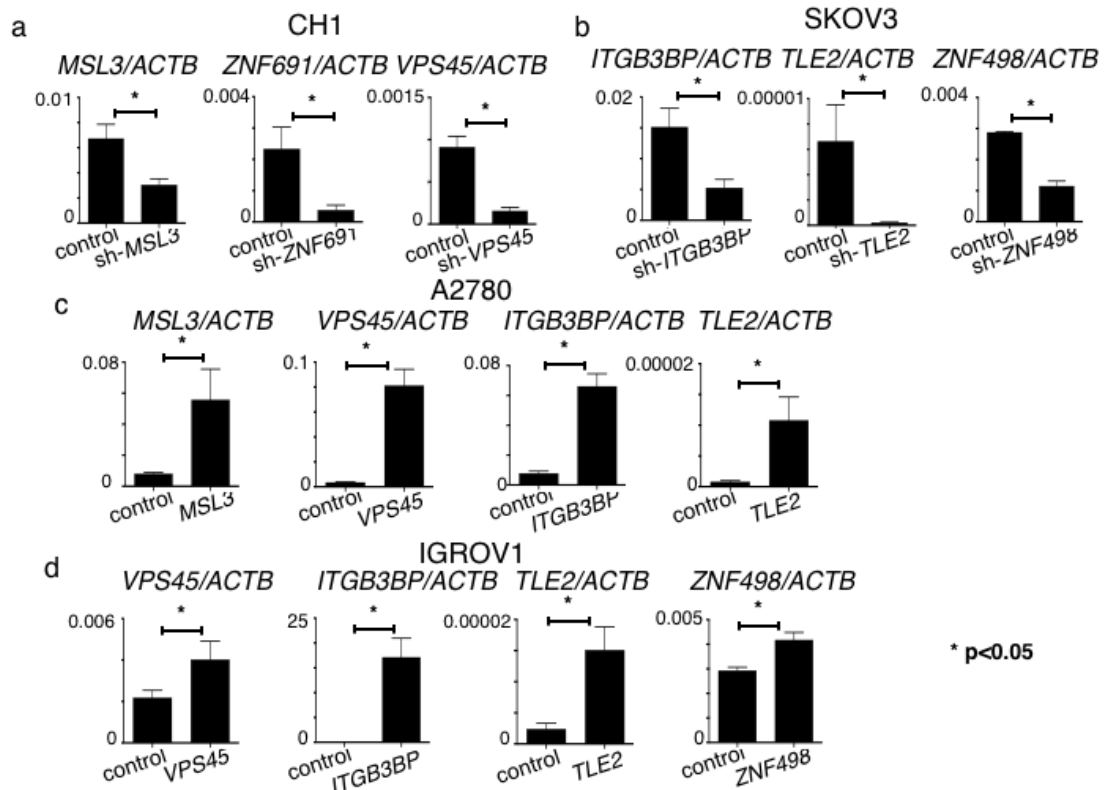

Supplementary Fig. 5. Establishment of cell lines with altered expression of the six target genes.

Target gene mRNA suppression or overexpression was measured by RT-PCR.

a) Establishment of CH1 clones whose mRNA expression for *MSL3*, *ZNF691* or *VPS45* is suppressed by shRNAs.

b) Establishment of SKOV3 clones whose mRNA expression for *ITGB3BP*, *TLE2* or *ZNF498* is suppressed by shRNAs.

c) Establishment of A2780 clones with elevated mRNA expression for *MSL3*, *VPS45*, *ITGB3BP* or *TLE2*.

d) Establishment of IGROV1 clones with elevated mRNA expression for *VPS45*,  
*ITGB3BP*, *TLE2* or *ZNF498*.

\*;  $p < 0.05$ .

Figure S6

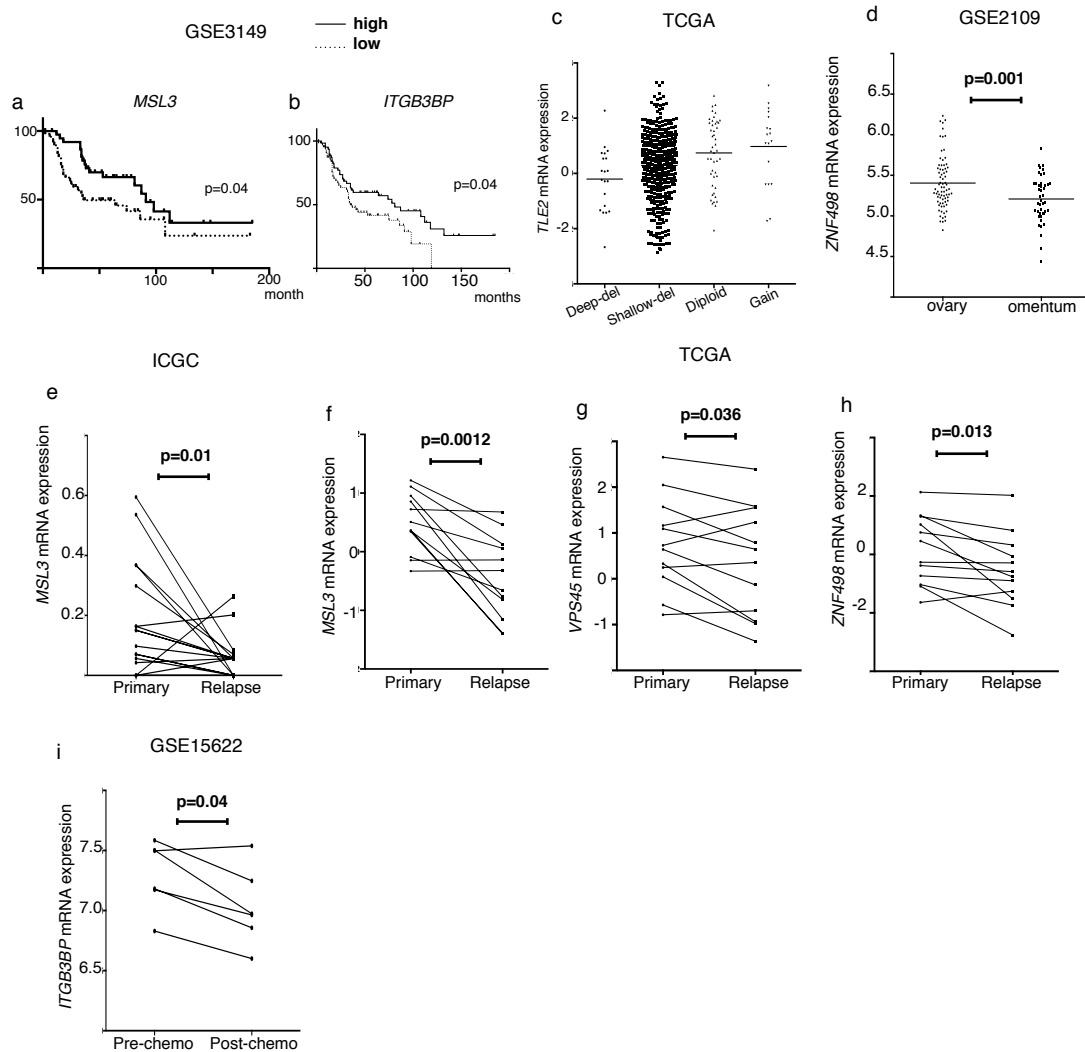

Supplementary Fig. 6. Analyses of the clinical data of the six genes.

a) Overall survival of ovarian cancer patients in data set GSE3149. Differences in survival based on *MSL3* mRNA expression are shown. The low expression group consisted of the 50 cases with the lowest level of expression while the high expression group consisted of the 50 cases with the highest level of expression.

b) Overall survival of ovarian cancer patients in data set GSE3149. Differences in survival



based on *ITGB3BP* mRNA expression are shown. Samples were stratified into two groups based on the median of mRNA expression.

c) Copy number alterations of *TLE2* in TCGA samples. del; deletion.

d) Comparison of *ZNF498* mRNA expression between ovarian cancer tissues from the primary site (n=75) and that from disseminated sites (n=45) using gene expression microarray dataset GSE2109.

e) Change in *MSL3* mRNA expression levels between pre-chemotherapy and post-chemotherapy paired samples (n=17) from dataset ICGC.

f~h) Analysis using primary and relapsed paired samples (n=12) from dataset of TCGA.

f) Change in *MSL3* mRNA expression.

g) Change in *VPS45* mRNA expression.

h) Change in *ZNF498* mRNA expression.

i) Change in *ITGB3BP* mRNA expression levels between pre-paclitaxel treatment and post-paclitaxel treatment paired samples (n=6) from dataset GSE15622.

The details of each dataset are described in Supplementary Material and Method.

Figure. S7

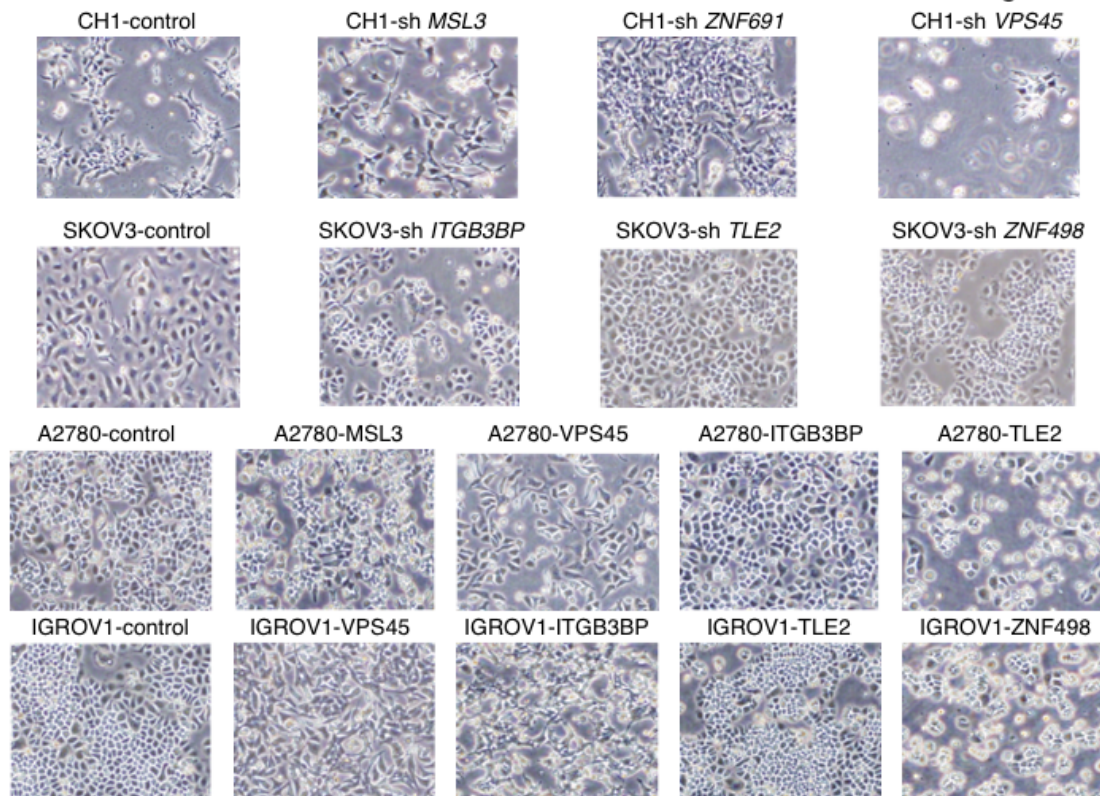

Supplementary Fig. 7: Alteration of mRNA expression of the six target genes changes cell morphology in vitro.

For typically spindle-shaped SKOV3, suppression of *ITGB3BP*, *TLE2*, and *ZNF498* led to a cobblestone appearance (Supplementary Fig. S8). For cobblestone shaped A2780 cells, overexpression of *MSL3* and *VPS45* changed the morphology to spindle shaped. For cobblestone shaped IGROV1, overexpression of *VPS45* and *ITGB3BP* changed the cell morphology to spindle.

Figure. S8

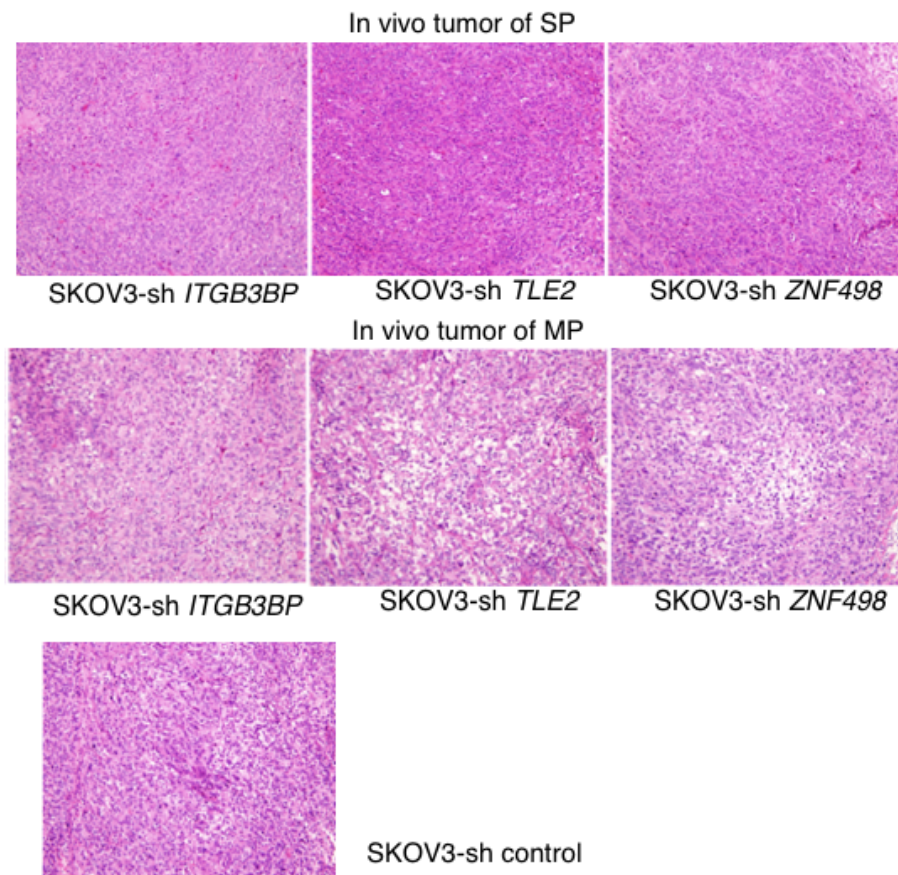

Supplementary Fig. 8. Sections from in vivo tumors formed by newly generated SP cells derived from suppression of *ITGB3BP*, *TLE2* and *ZNF498* exhibit different morphology from those of MP or control cells.

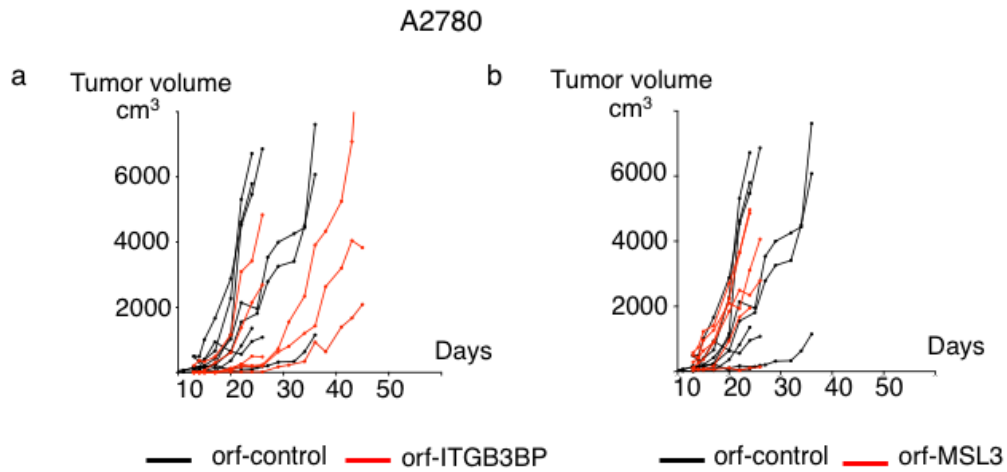

Supplementary Fig. 9. Overexpression of six genes regulates in vivo tumor proliferation.

a) Tumor growth curves from injection of  $1 \times 10^5$  A2780 control cells and A2780 ORF-ITGB3BP. Overexpression of ITGB3BP tended to decrease in vivo proliferation ability.

b) Tumor growth curves from injection of  $1 \times 10^5$  A2780 control cells and A2780 ORF-MSL3.

X-axis, days post-injection; Y axis, tumor volume.

Figure. S10

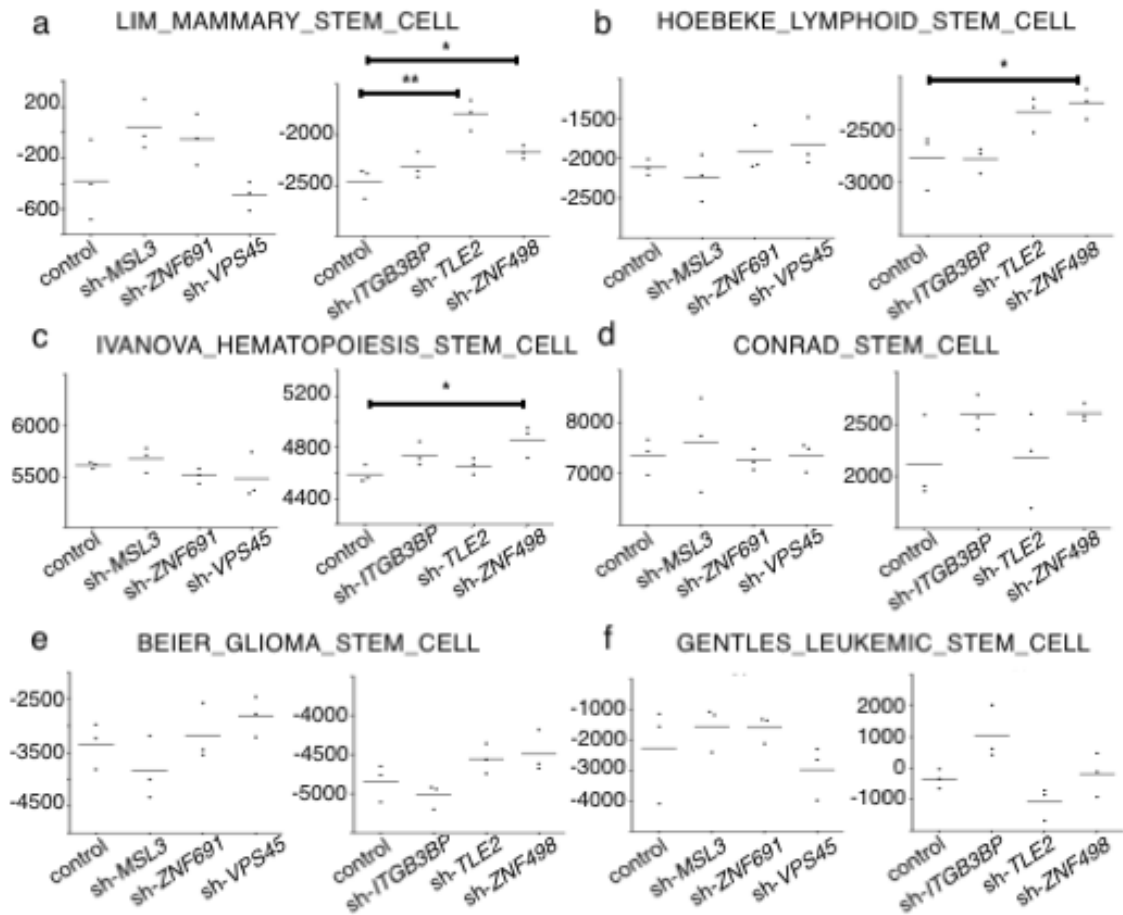

Supplementary Fig. 10. Suppression of six target genes can enhance the CSC phenotype.

ssGSEA analyses are shown. Comparison of ssGSEA scores for CH1-shcontrol, sh-MSL3, sh-ZNF691 and sh-VPS45 samples, and for SKOV3-shcontrol, sh-ITGB3BP, sh-TLE2 and sh-ZNF498 samples (n=3, each). Signatures related to CSC phenotype were analyzed. \*\*p<0.01 \*p<0.05

(a) Signature of LIM\_MAMMARY\_STEM\_CELL

(b) Signature of HOEBEKE\_LYMPHOID\_STEM\_CELL

(c) Signature of IVANOVA\_HEMATOPOIESIS\_STEM\_CELL

(d) Signature of CONRAD\_STEM\_CELL

(e) Signature of BEIER\_GLIOMA\_STEM\_CELL

(f) Signature of GENTLES\_LEUKEMIC\_STEM\_CELL

We performed a transcriptome analysis and investigated potential CSC-like functions. We extracted RNA from samples of the CH1-sh-control, CH1-sh-MSL3, CH1-sh-ZNF691, CH1-sh-VPS45, SKOV3-sh-control, SKOV3-sh-ITGB3BP, SKOV3-sh-TLE2, and SKOV3-sh-ZNF498 followed by RNA sequencing (n=3 each). Using this data, we calculated the scores of stem cell-related gene signatures by ssGSEA. We found that the gene sets, CONRAD\_STEM\_CELL, BEIER\_GLIOMA\_STEM\_CELL, GENTLES\_LEUKEMIC\_STEM\_CELL, LIM\_MAMMARY\_STEM\_CELL, HOEBELE\_LYMPHOID\_STEM\_CELL, and IVANOVA\_HEMATOPOIESIS\_STEM\_CELL, tended to increase with suppression of the six genes (a-f). In particular, the score of the LIM\_MAMMARY\_STEM\_CELL signature was significantly higher in the sh-TLE2 group compared to the control group (a,  $p=0.006$ ). The scores of the LIM\_MAMMARY\_STEM\_CELL, HOEBELE\_LYMPHOID\_STEM\_CELL and IVANOVA\_HEMATOPOIESIS\_STEM\_CELL signatures were significantly higher in the sh-ZNF498 group compared to the control group (a-c;  $p=0.038, 0.043, 0.03$ , respectively).

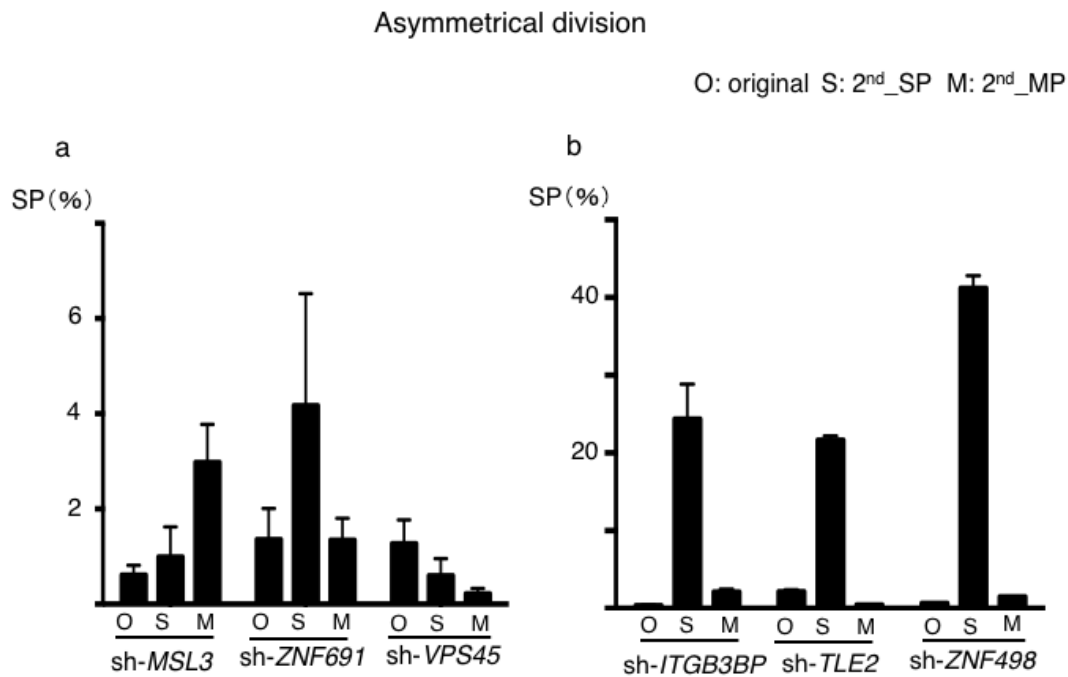

Supplementary Fig. 11. Asymmetric cell division ability was assessed.

a) Analysis of CH1 cells.

b) Analysis of SKOV3 cells. The SP fraction was significantly enriched in 2<sup>nd</sup>\_SP. SP cells can be detected in 2<sup>nd</sup>\_MP cells.

We investigated asymmetrical division capacity. We sorted the SP and MP fractions separately, followed by two weeks culture in normal cell culture conditions, and established 2<sup>nd</sup> generation-SP and 2<sup>nd</sup> generation-MP cells, and analyzed the proportion of the SP cells of the 2<sup>nd</sup> generation. As a result, the proportion of the SP cells of the 2<sup>nd</sup> generation-SP derived from the three genes suppressed SKOV3 cells were markedly enriched (a). However, the proportion of the SP cells of the 2<sup>nd</sup> generation-MP cells were

almost the same as that of the original three genes-suppressed SKOV3 cells (a). For CH1, we found that the proportion of the SP cells of the 2<sup>nd</sup> generation-MP cells was not different from that of the original three genes-suppressed CH1 cells (b).



Figure S12

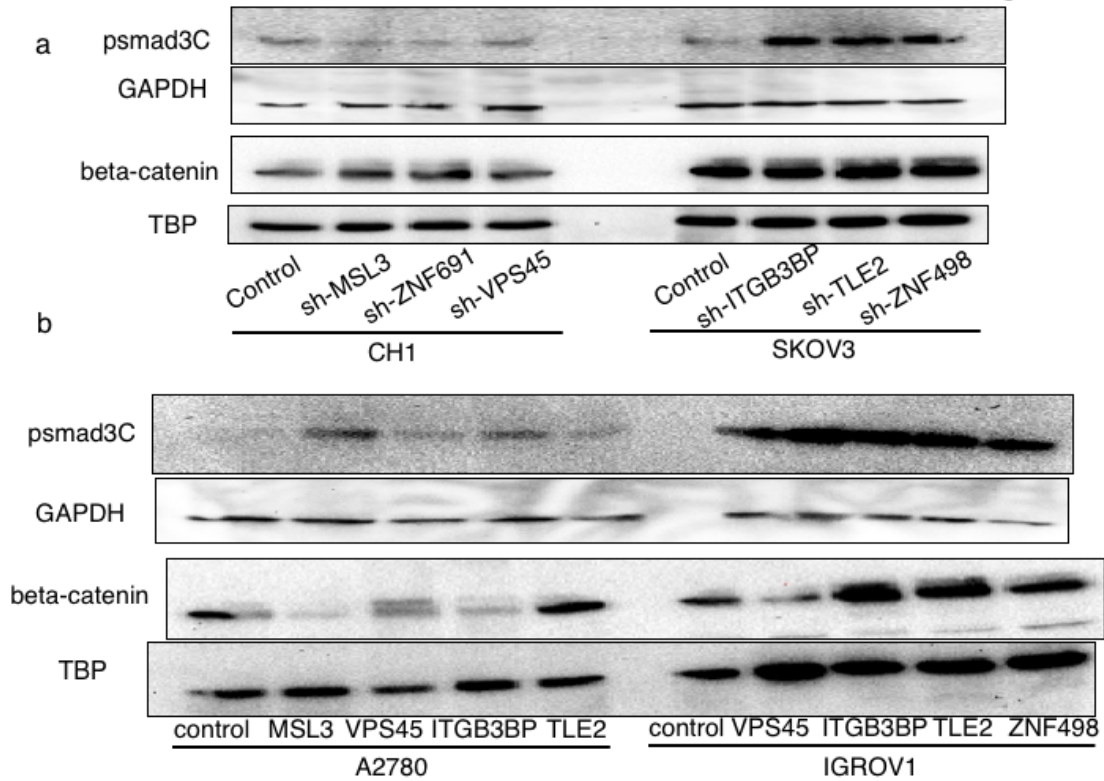

Supplementary Fig. 12. Several of the six target genes regulate TGF- $\beta$  pathway and Wnt pathway activity.

The TGF- $\beta$  pathway was assessed by phosphorylation of Smad3C using Western blotting.

The Wnt pathway was assessed by  $\beta$ -catenin nuclear accumulation using Western blotting.

All experiments were performed in triplicate.

a) Representative image of Western blotting in control cells and cells with repression of sh-target genes for both CH1 and SKOV3. Phosphorylation of Smad3C is markedly increased by suppression of *ITGB3BP*, *TLE2* and *ZNF498* in SKOV3 cells. Slight  $\beta$ -catenin nuclear accumulation was evident with suppression of *MSL3*.

b) Representative Western blotting for A2780 and IGROV1 with control cells and cells with overexpression of target genes. Phosphorylation of Smad3C is not decreased by overexpression of five genes. Overexpression of *MSL3* and *VPS45* markedly decreased nuclear  $\beta$ -catenin accumulation.

The details of western blotting method are described in supplementary Material and Method.

See Supplementary Figure 14 for full image of the blots.

Figure. S13

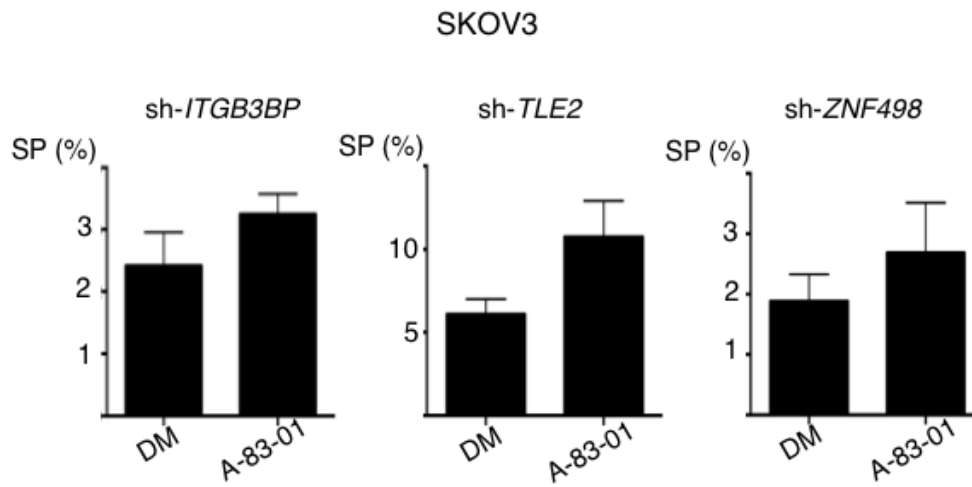

Supplementary Fig. 13. Inhibition of the TGF- $\beta$  pathway does not decrease the SP

fraction that was generated by suppression of *ITGB3BP*, *TLE2* and *ZNF498*.

DM; DMSO (control). A-83-01 (Sigma-Aldrich, St.Louis, USA): Inhibitor of TGF- $\beta$

pathway, which was used to inhibit the TGF- $\beta$  pathway.

Figure S14

a psmad3C blot

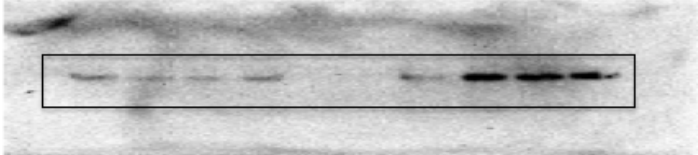

b GAPDH blot

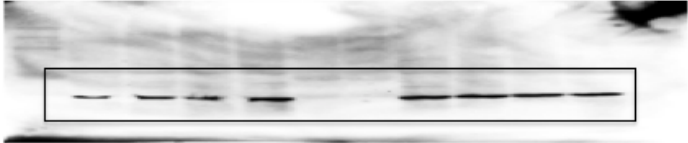

c beta-catenin blot

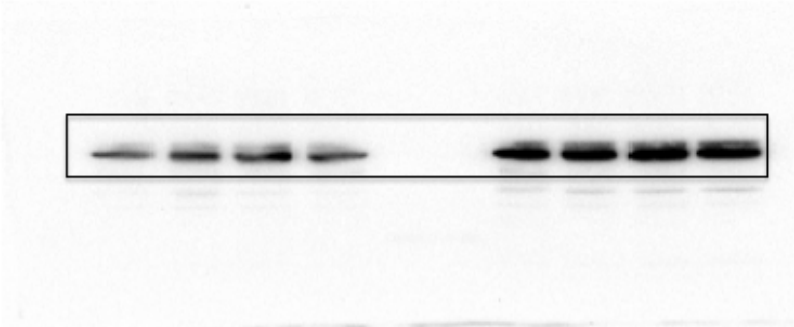

d TBP blot

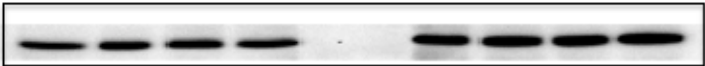

e psmad3C blot

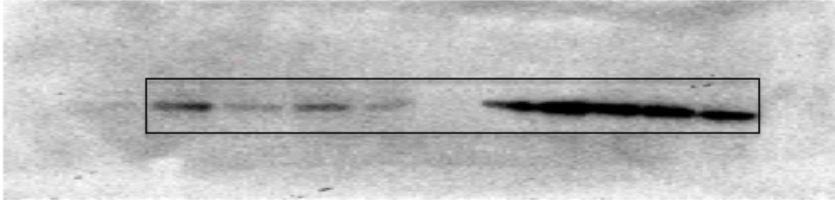

f GAPDH blot

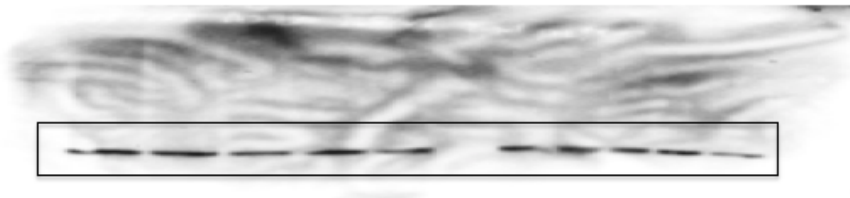

g beta-catenin blot

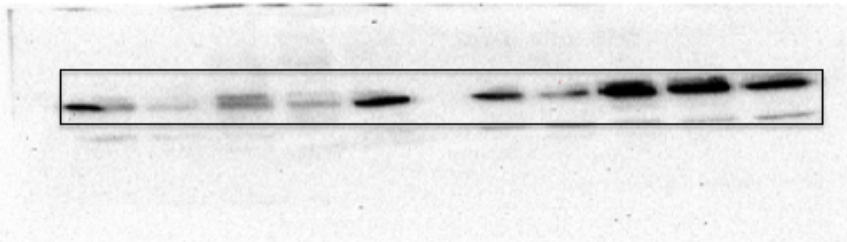

h TBP blot

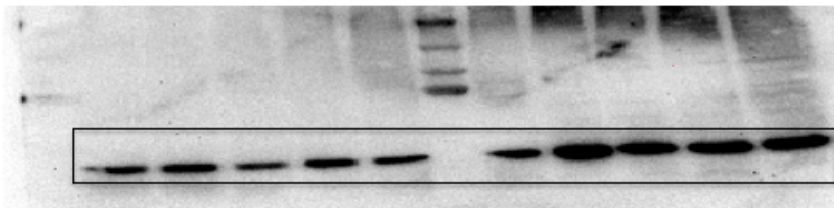

Supplementary Fig. 14. Full images of the blots in Supplementary Figure 12..

Supplementary Table S1: Antisense sequence of 1st screen, and SP percentage in 2nd screen.

a) Datas using CH1 cells

| Anti-sense sequence    | Target gene | NM number      | SP(%) | mRNA check |
|------------------------|-------------|----------------|-------|------------|
| TAAGAAGTGTAACCTCGTCTGG | MAST4       | NM_001164664.1 | 3.79  | yes        |
| TTGTAGTGTCTCTCTCCAGG   | ZNF691      | NM_015911.2    | 2.43  | yes        |
| TAGCTGACATTCCATGAGAGC  | DBH         | NM_000787.3    | 2.19  | yes        |
| AGATGAGTTCTAACCAACCAGC | VPS45       | NM_007259.3    | 2.01  | yes        |
| TCTAGTCTTTCCAGAGACAG   | HSFY2       | NM_001001877.1 | 1.7   | yes        |
| AAACACATTGTCAATGTGGCG  | MC5R        | NM_005913.1    | 1.64  | yes        |
| ATGGATTCAACAAAGGCGGAC  | MSL3        | NM_006800.2    | 1.54  | yes        |
| ATTCTTAACCACTTGACGCCA  | PRKAG2      | NM_024429.1    | 1.51  | yes        |
| TTTCTATGGGCCTCCTAAGTC  | GIPC2       | NM_017655.4    | 1.31  | yes        |
| TGAGGTAGAGAAAGCAGCAGG  | TNFSF9      | NM_003811.2    | 1.24  | yes        |
| AGAGCCACTGGTCAGGCTGGC  | HAMP        | NM_021175.2    | 1.19  | yes        |
| GAAGAAATACATGGGAGTGTG  | OR10J5      | NM_001004469.1 | 1.15  | yes        |
| TTCTCTTCGAATGAGAAGCGC  | MYPOP       | NM_001012643.2 | 1.14  | yes        |
| ATGTGTTTAGGATAGAAAGGG  | CBX5        | NM_012117.1    | 1.06  | yes        |
| ATTGTCAATCTCCACCAGTCG  | LMNA        | NM_005572.3    | 1.02  | yes        |
| AACTTGGCGTAGATGCTCTGG  | RCVRN       | NM_002903.2    | 0.966 | yes        |
| ATAGCTGCTGAACTATGATAC  | SLC27A6     | NM_001017372.1 | 0.96  | yes        |
| ATCTCCTTCTTATGATGAACG  | ATPIF1      | NM_016311.3    | 0.86  | yes        |
| TACTAGTAGTAACTTAGGTGG  | ENPP4       | NM_014936.4    | 0.83  | yes        |
| ATGTAAGTATTATCAGACGGC  | SV2A        | NM_014849.3    | 0.799 | yes        |
| AAAGATCTGAAAGTAACACGG  | C1orf109    | NM_017850.1    | 0.79  | yes        |
| AATCCACATTGCTTGTGCTG   | STOX2       | NM_020225.1    | 0.772 | yes        |
| ATGGAGCCACTATCAAGGAAG  | FGR         | NM_001042729.1 | 0.75  | yes        |
| TTCAGAGTCTTGTATTCCGCG  | RBM15       | NM_022768.4    | 0.748 | yes        |
| TCATTTGTGTGATCAGGTTGC  | KIAA0101    | NM_001029989.1 | 0.74  | yes        |
| GTTGGGACCACTGAATCATTG  | PPP4R2      | NM_174907.2    | 0.655 | yes        |
| CACAAATTCTTAAGGACCGAC  | MGAT5       | NM_002410.3    | 0.608 | yes        |
| AAAGGCAAATAACAATGAGGG  | PPM1H       | NM_020700.1    | 0.56  | yes        |
| ATGAGAAGAGTCAAACCATTG  | RTN2        | NM_005619.3    | 0.55  | yes        |
| ATAAACATCTATCTCACAGGC  | RFX1        | NM_002918.4    | 0.51  | yes        |
| TATAACCTCGATCATGTTCTC  | C9orf64     | NM_032307.3    | 0.45  | yes        |
| AACAGGTAACCACTTGAGAGG  | SPCS1       | NM_014041.2    | 0.431 | no         |
| AATAAACTTGAAGTACCAAGG  | GPR87       | NM_023915.3    | 0.4   | no         |
| ATAAAGTCCGTAGGACTTCGG  | MMD         | NM_012329.2    | 0.38  | no         |
| AATCTCAGAAATGATACGGTC  | EMILIN1     | NM_007046.3    | 0.37  | no         |
| AACTTGTGAAACCACCTTGG   | DUSP7       | NM_001947.3    | 0.33  | no         |
| AAGGCAAAGAAGTGGTAAGGG  | BDKRB1      | NM_000710.2    | 0.32  | no         |
| CTCAAAGCATCAGTCCCATGC  | MOB2        | NM_001172223.1 | 0.32  | no         |
| ATCACTCTGAATAACTTCTCG  | PDIA6       | NM_005742.2    | 0.3   | no         |
| ATATCTAGGTAGCCACAGGAG  | PPP1R12C    | NM_017607.2    | 0.2   | no         |
| AAGATCACTATGAAGAATTGG  | RMI1        | NM_024945.2    | 0.19  | no         |

|                        |           |                |       |    |
|------------------------|-----------|----------------|-------|----|
| TAGAAGTAGCGGTAGTTCCTC  | ZDHC9     | NM_001008222.1 | 0.142 | no |
| AAGTGCTGACAACGGTGATTC  | BAG1      | NM_004323.4    | 0.13  | no |
| TTAGGCCATTCTCATTGTGCG  | CRTAC1    | NM_018058.4    | 0.086 | no |
| TTGAAGTTAGAGATTGCCCTG  | METTL7B   | NM_152637.2    | 0.075 | no |
| TAGAGACCCTTATTGAAGTAG  | SFXN2     | NM_178858.4    | 0.065 | no |
| TAGCTGTGAGAAGTCATGTGC  | ZNF488    | NM_153034.2    | 0.06  | no |
| AAAGGATTATTCCAATGAGGG  | SLITRK4   | NM_173078.2    | 0.043 | no |
| ATGTCCCGACTTTCAGAAGGC  | DRD5      | NM_000798.3    | 0.038 | no |
| GAGATGAAATTGCTGAGGAGG  | SYT7      | NM_004200.2    | 0.036 | no |
| AAGTGTCTTTGCATACTGGC   | TRIM13    | NM_001007278.1 | 0.035 | no |
| CTCACGAGGGAGTATTTCTTG  | ZC3H3     | NM_015117.2    | 0.023 | no |
| AATAGGAGAATTTGCTTTGGC  | HYDIN     | NM_017558.2    | 0.018 | no |
| AAACCCTGTCTGTATAGTGC   | AFF1      | NM_001166693.1 | 0.011 | no |
| ATGTCGACAAATTTAGTTCAC  | CCDC59    | NM_014167.4    | 0.01  | no |
| AAGCTCATCAGCTTAGGGATG  | CCDC80    | NM_199511.1    | 0.01  | no |
| AAATGATTCATCGTCAGAGTC  | CDCA7     | NM_031942.4    | 0.01  | no |
| TAAGGCAGAAGATGTAGAGCG  | CDKN1A    | NM_078467.1    | 0.01  | no |
| TACTCAATCTTCAGGCTTGGG  | CIB4      | NM_001029881.1 | 0.01  | no |
| ATTACATTGCAGTTTCCGGGG  | CORIN     | NM_006587.2    | 0.01  | no |
| TTACCATAGAGTCTGGCTTTC  | DYNC1LI2  | NM_006141.2    | 0.01  | no |
| TTATTAAGGTGCACACCCATG  | EFS       | NM_005864.2    | 0.01  | no |
| ATTTCCCATCATTAAAGAAGGC | FAM91A1   | NM_144963.2    | 0.01  | no |
| TAGATTTCCGGGATACAGCAC  | FHOD1     | NM_013241.2    | 0.01  | no |
| TTAACCTCATCTTTAGAGAG   | FKBP14    | NM_017946.2    | 0.01  | no |
| CTTTAACCTCATCTTTAGAGA  | FKBP14    | NM_017946.2    | 0.01  | no |
| ATCTGCTTGCAATCACATGG   | GFPT2     | NM_005110.1    | 0.01  | no |
| AACCAAACGCAACCTGCAGTG  | GMCL1     | NM_178439.3    | 0.01  | no |
| CATTTACAACGGGCATTTGGC  | KIAA0528  | NM_014802.1    | 0.01  | no |
| ATGTTGATAATTTCTTGGTGG  | NDUFB10   | NM_004548.2    | 0.01  | no |
| TTCATAGACCCAGTCATGAGC  | NME1-NME2 | NM_001018136.1 | 0.01  | no |
| ATACAGATCAATGAGCCCTGC  | OAS2      | NM_002535.2    | 0.01  | no |
| TGCCTTAGCAAACCTCTAGTCG | BPMS      | NM_001008710.1 | 0.01  | no |
| TACAGCCACCATGTTAAGGC   | RIOK2     | NM_001159749.1 | 0.01  | no |
| ATAGACGAAGATGGAAACGGG  | SCYL1     | NM_020680.3    | 0.01  | no |
| ATACTGTTCAAATTCGGTGCG  | SOX17     | NM_022454.3    | 0.01  | no |
| ATTCTAAAGATTCCACTCGGG  | SPAG9     | NM_001130528.2 | 0.01  | no |
| ACTAACCTTGAGGAGAGCTG   | SUN2      | NM_015374.1    | 0.01  | no |
| ATACCTCATAAGTTTCCTTTG  | TBC1D1    | NM_015173.2    | 0.01  | no |
| CAATTCCACATTGATCGTGCG  | TECTA     | NM_005422.2    | 0.01  | no |
| AATTCCACATTGATCGTGCGG  | TECTA     | NM_005422.2    | 0.01  | no |
| TTCCAACCTGAAAGATTTGAGC | TLR7      | NM_016562.3    | 0.01  | no |
| AGTGGCCAGAACATTCTCATC  | WDR55     | NM_017706.4    | 0.01  | no |
| ACTTACTACCAACAGCTAGGG  | WIPI2     | NM_016003.3    | 0.01  | no |
| TATAATCTGCTGATACTGTTG  | YLPM1     | NM_019589.2    | 0.01  | no |
| ATTCTGAGTGAACTTCTTTC   | ZKSCAN3   | NM_024493.2    | 0.01  | no |

|                       |           |             |       |    |
|-----------------------|-----------|-------------|-------|----|
| ATTTGTAAGCTCAGGTATGGG | ESRRB     | NM_004452.3 | 0.001 | no |
| TTTAGCATCTTCTTTGAGTTC | EVC       | NM_153717.2 | 0.001 | no |
| TAGACTACCTCTCACACCTGG | GPR153    | NM_207370.2 | 0.001 | no |
| TTGGTATAAGTGATGGTGCGC | KIAA1024  | NM_015206.2 | 0.001 | no |
| AAATTGTCTGTATCTGACTGA | TBR1      | NM_006593.2 | 0.001 | no |
| TAGCTGGTGAATTTAACTGAC | TMPRSS11D | NM_004262.2 | 0.001 | no |
| TTAGTAGTATTTCTTCAAGC  | TNFRSF1A  | NM_001065.2 | 0.001 | no |
|                       | SP(%)     |             |       |    |
| control-1             | 0.122     |             |       |    |
| control-2             | 0.053     |             |       |    |
| control-3             | 0.084     |             |       |    |
| control-4             | 0.0483    |             |       |    |

b) Datas using SKOV3 cells

| Anti-sense sequence    | Target Gene | NM number      | SP(%) |
|------------------------|-------------|----------------|-------|
| TTTCTGGAGATGTCACAACCTC | TLE2        | NM_001144761.1 | 23.1  |
| TTAGCCAGATATTGTTGTGCG  | C14orf119   | NM_017924.2    | 9.93  |
| TTCATAGCTGTCAAGATGACG  | ITGB3BP     | NM_014288.3    | 7.5   |
| TTATAGGGCATAGACTCGAAG  | SHMT2       | NM_005412.4    | 3.93  |
| ATACCTGAGCTATAACTGGTG  | ZNF235      | NM_004234.4    | 3.3   |
| CATTTCTGCGGGATGCCGTTG  | CELSR1      | NM_014246.1    | 3.18  |
| AATATAGGGCATTAACTAG    | ZNF498      | NM_145115.2    | 2.57  |
| TAGAGCTGTGTGTTTGTACTG  | FAM175A     | NM_139076.2    | 2.36  |
| ATAATGACCAAGCTGGTGAGG  | CYB561D2    | NM_007022.3    | 1.9   |
| AATAGGAGAATTTGCTTTGGC  | HYDIN       | NM_017558.2    | 1.87  |
| TAGCTGGTGAATTTAACTGAC  | TMPRSS11D   | NM_004262.2    | 1.77  |
| AATCAAATTCATAACAGGTC   | XPA         | NM_000380.2    | 1.77  |
| TTCCAGAATTTCTCCATAGGC  | NDUFB6      | NM_002493.3    | 1.55  |
| TTCTGGTGCCACTGTTGTATC  | CES3        | NM_024922.4    | 1.49  |
| AATGCAGAATCCTTCTTTCAG  | MRPL16      | NM_017840.3    | 1.22  |
| CTTGAAGTGTGGATCTAGGTC  | CSNK2A2     | NM_001896.2    | 1.17  |
| TAGATTTCTGTTTAGGTGGCG  | SRRM2       | NM_016333.3    | 1.08  |
| TCCTTCTCCATATTTCACTGG  | ITLN1       | NM_017625.2    | 1.07  |
| AATATGATGGTGAGCTTCCGG  | HFE2        | NM_145277.4    | 1.06  |
| ATTGGATTTCTGTTGCGTTTC  | CSH1        | NM_001317.3    | 0.9   |
| AGCTGAGATGACTTTCACTGG  | ODF2L       | NM_001007022.1 | 0.9   |
| TTATTCCTATTCCATCATTGG  | UFM1        | NM_016617.2    | 0.89  |
| AAACCACTCGAATAAGTCAGG  | CRELD2      | NM_001135101.1 | 0.86  |
| CATCTTGGAACACAGGAGCTG  | HS6ST3      | NM_153456.2    | 0.74  |
| TTGAAGCCTCACAACTTGGC   | KIF11       | NM_004523.3    | 0.728 |
| TATAGTCGGCTTTCAGCCGGG  | KIF17       | NM_001122819.1 | 0.69  |
| TACAAGTAGAATAACACTCAG  | BAGE        | NM_001187.1    | 0.64  |
| TTGCCGTGGCCCTTAACCTGG  | HBA1        | NM_000558.3    | 0.64  |
| TTCTATTCTGTGGAGTATGGC  | IRF9        | NM_006084.4    | 0.59  |



|                       |         |                |       |
|-----------------------|---------|----------------|-------|
| CATTTCGAACCACAAGAATCA | PTRH2   | NM_016077.3    | 0.57  |
| TGGGTAGAAATTCAGAATGGC | CCT6B   | NM_006584.2    | 0.52  |
| ATTTAAGCTGTCTGCCATGCG | EGLN2   | NM_053046.2    | 0.51  |
| AACCACCCTAGTCACATAAGG | CELA2A  | NM_033440.2    | 0.47  |
| ATAGAACAGTAAAGGGAGAGG | PAN2    | NM_014871.2    | 0.459 |
| ATTCGCTTAAATGATGCTTGC | MAPRE2  | NM_014268.1    | 0.456 |
| ATAGACAGTGAGACAGTGAGC | GPR142  | NM_181790.1    | 0.45  |
| GTTGGGACCACTGAATCATTG | PPP4R2  | NM_174907.2    | 0.42  |
| ATCACGATGCTGTTGTCTCTG | DHX38   | NM_014003.3    | 0.41  |
| TTCAACTCTCTTCATTGCATC | RSL24D1 | NM_016304.2    | 0.39  |
| ACCTTGGCTAAACTGGCATCA | LRRC29  | NM_001004055.1 | 0.361 |
| TTGTCTATCTTTCCTTGATTC | TCEAL2  | NM_080390.3    | 0.355 |
| ATGACCTTCCTCAGTAGCTTG | CCL27   | NM_006664.2    | 0.34  |
| TGACAAAGAATGAGTGTGCTG | RP1     | NM_006269.1    | 0.32  |
| AAGAGTATGGTGGTCTTATCA | AMELY   |                | 0.3   |
| CTAAGATGTGTGCTCCGGCTA | ZNF391  | NM_001076781.1 | 0.294 |
| AATAAACGTGCAAGGCATCTG | CASP14  | NM_012114.1    | 0.26  |
| TTGACTATCACTTGTAGGTGG | SCHIP1  | NM_014575.2    | 0.26  |
| TTGTTACGCATAATTTCCGTC | SCHIP1  | NM_014575.2    | 0.26  |
| TTCCTATCTGCAATGTAAAGC | SEC63   | NM_007214.4    | 0.26  |
| TAGATCAAGCTGTATCCATGC | ZNF527  | NM_032453.1    | 0.258 |
| TTAAGACCGATATTCCTGAGC | PLCL1   | NM_001114661.1 | 0.25  |
| TTGATGGTGTGGTCTGACAGC | FCHSD1  | NM_033449.1    | 0.2   |
| ATCAGTTGTTTCATTCGCCCA | PDIK1L  | NM_152835.3    | 0.2   |
| ATTGGTAATGCACACAGAGAG | C9orf46 | NM_018465.2    | 0.19  |
| AACTTGGTGTACTTCTTGAGC | CHST12  | NM_018641.3    | 0.175 |
| AAGTAGAGGCAGATGGTAAGC | CHMP2B  | NM_014043.3    | 0.17  |
| CATACCCTAGCTCGGATGGGA | FKBP2   | NM_001135208.1 | 0.17  |
| TAAGAGATGATTTATCTCTGC | RGSL1   | NM_001137669.1 | 0.17  |
| AAGAAGGGTCAGCTGAAGAGC | C2CD2L  | NM_014807.3    | 0.16  |
| TTCCAGGACCTTGTATTCTGG | ELL3    | NM_025165.2    | 0.15  |
| ATCTCTCAGTTTCCTTGATCG | GDA     | NM_004293.3    | 0.15  |
| TTGTTGGCATAAACTGTAGTC | PON2    | NM_000305.2    | 0.15  |
| AAAGATGTAAATGGCTTTGC  | TKTL2   | NM_032136.4    | 0.15  |
| AATCTTAAATATGTTGCCAG  | PTPRR   | NM_002849.2    | 0.148 |
| CAATGCGCCATCTTGTATC   | ADAMTS4 | NM_005099.4    | 0.124 |
| TTCTTGGTATGTTTGCTCAGG | TMTC4   | NM_001079669.1 | 0.11  |
| AAGATTAGATATGGAGGCAAC | USP39   | NM_006590.2    | 0.11  |
| ATTTCTGAGCTATGCCTGGTG | CTTNBP2 | NM_033427.2    | 0.107 |
| AAGTAGGGAAGGTGCAAGGTG | RNLS    | NM_001031709.2 | 0.103 |
| AATATGGACCAGAGCCAAGAG | OR2A12  | NM_001004135.1 | 0.1   |
| TAGAGGTCGCAGTCGTAGAGG | CHST1   | NM_003654.3    | 0.099 |
| AAAGGCAAATAACAATGAGGG | PPM1H   | NM_020700.1    | 0.092 |
| TTTGTTAGTTTAAGAACCTGG | NHS     | NM_001136024.2 | 0.09  |
| AAGGGAAGCTCTTCTAGCTC  | UTS2    | NM_006786.3    | 0.09  |

|                        |          |                |        |
|------------------------|----------|----------------|--------|
| TCTCTACTTTAGGTCACCTCG  | C16orf72 | NM_014117.2    | 0.089  |
| ATAAACTCGTTGAAGCGTTTG  | PIP4K2B  | NM_003559.4    | 0.085  |
| AAAGGCATCATCCTGGATGCT  | CABC1    | NM_020247.4    | 0.081  |
| ATAAAGTCCGTAGGACTTCGG  | MMD      | NM_012329.2    | 0.071  |
| TTCTTTGAAATTCGTCTTGGG  | CENPC1   | NM_001812.2    | 0.07   |
| TATAGGCTGCTGCTGGTTGGG  | YBX2     | NM_015982.3    | 0.064  |
| AGACCTATACAGAAGCTGTCG  | SFI1     | NM_001007467.1 | 0.06   |
| CTTTCCATGGTAACGACACAG  | PDSS2    | NM_020381.3    | 0.057  |
| CACAAATTCCTAAGGACCGAC  | MGAT5    | NM_002410.3    | 0.052  |
| AATGGCACAGTTTATCACGAC  | ENAH     | NM_001008493.1 | 0.05   |
| CCATAGTAAGTGTTGACCAA   | UBIAD1   | NM_013319.2    | 0.044  |
| ATTAGCTTGATACACGTGGG   | DCUN1D5  | NM_032299.3    | 0.04   |
| TTGGTGAGGTTTAGCTTACTG  | MAGEB1   | NM_002363.4    | 0.04   |
| ATCTTGGACGTGAAGAAGTGC  | PLXNA1   | NM_032242.3    | 0.039  |
| AAGGTGGATAAGTACTTGGTC  | TRIM17   | NM_001024940.2 | 0.038  |
| TTCACTGAGCTGGAAGGCGGC  | MESP2    | NM_001039958.1 | 0.036  |
| TTGACATTAGTGTGTAGCTGG  | VDAC2    | NM_003375.2    | 0.031  |
| AAACAGGAAGGTAAATTAGAC  | OR4D9    | NM_001004711.1 | 0.03   |
| TTAAGGCGGCTATTGTATTGC  | DGKK     | NM_001013742.1 | 0.0229 |
| ATGACAACAGTCTTGACCAGG  | LPAR2    | NM_004720.5    | 0.02   |
| AATATTTGACTACATGAGGGC  | STK4     | NM_006282.2    | 0.02   |
| AATTGGAACCTCATTGGCATC  | GATM     | NM_001482.2    | 0.013  |
| AATGCTGCTTAGACCAGTTGG  | AIM2     | NM_004833.1    | 0.01   |
| TAATGCTCCAATGCTACTCG   | ARID3B   | NM_006465.2    | 0.01   |
| AAGAAGGAAACATTCAATAGG  | C1orf109 | NM_017850.1    | 0.01   |
| CAATATCCAGGAGTGACTGCG  | CYS1     | NM_001037160.2 | 0.01   |
| ATCTGAACAACCTTGATAACCG | FASTKD3  | NM_024091.2    | 0.01   |
| TACCTTTAATAGTTTCTCTGC  | ITM2B    | NM_021999.2    | 0.01   |
| AGTGTTCACAACACTGAGAGG  | LAMP2    | NM_002294.1    | 0.01   |
| ATAGATTCCCAGGAACAGGAG  | OR8D1    | NM_001002917.1 | 0.01   |
| TACATGGCAGATCGGGAATAC  | RPL6     | NM_001024662.1 | 0.01   |
| TGCCCTACAGCAATTTCTGAG  | SLC25A35 | NM_201520.1    | 0.01   |
| TTGAGCTCCGACTGGTTGTGG  | SOST     | NM_025237.2    | 0.01   |
| TTCATCCAGCTTAACAATGGC  | SPTAN1   | NM_003127.1    | 0.01   |
| TTTCCATTCCATATCATCAGG  | SUGT1    | NM_001130912.1 | 0.01   |
| AAATGCCGACACAAACCACTC  | TRAPPC2  | NM_001011658.3 | 0.01   |
| CAACAATCACCATATCGTCAC  | UQCRFS1  | NM_006003.2    | 0.01   |
| AAGGTTACTGAGTTCTGTGAC  | ZNF177   | NM_001172650.1 | 0.009  |
|                        | SP(%)    |                |        |
| control-1              | 0.086    |                |        |
| control-2              | 0.066    |                |        |
| control-3              | 0.055    |                |        |
| control-4              | 0.074    |                |        |

Supplementary Table S2:

Gene list significantly downregulated or upregulated by suppression of 6 genes.

(A) Genes significantly downregulated by sh-MSL3

| Gene list | log <sub>2</sub> -fold-change |
|-----------|-------------------------------|
| FOSB      | -4.18191                      |
| FOS       | -2.25775                      |
| A2M       | -2.00255                      |
| OLIG3     | -1.6759                       |
| FHDC1     | -1.35521                      |
| EGR1      | -1.08108                      |
| IER2      | -1.07422                      |
| JUN       | -1.00886                      |
| DHRS2     | -0.841775                     |

(B) Genes significantly upregulated by sh-MSL3

| Gene list    | log <sub>2</sub> -fold-change |
|--------------|-------------------------------|
| CXCL14       | 3.91678                       |
| HAPLN1       | 3.78177                       |
| TNFRSF11B    | 3.09781                       |
| CER1         | 2.99185                       |
| PSKH2        | 2.98947                       |
| COL3A1,MIR3c | 2.81225                       |
| RASGRP3      | 2.62125                       |
| CDH11        | 2.60686                       |
| LGR5         | 2.59575                       |
| ISM1         | 2.53031                       |
| WNT9B        | 2.4567                        |
| MIXL1        | 2.4564                        |
| HAS2         | 2.10645                       |
| IGFBP3       | 2.02902                       |
| IL8          | 1.97846                       |
| HEY1         | 1.75901                       |
| HAND1        | 1.75241                       |
| DKK1         | 1.74624                       |
| MSX1         | 1.74486                       |
| LIPG         | 1.68959                       |
| SNAI2        | 1.64438                       |
| ITGA9        | 1.59375                       |
| BMPER        | 1.58026                       |
| NRP1         | 1.46298                       |
| GPR124       | 1.41164                       |
| FN1          | 1.35286                       |
| FLNC         | 1.31755                       |
| APLNR        | 1.25522                       |

|         |          |
|---------|----------|
| SULF1   | 1.22959  |
| VEGF    | 1.1369   |
| COL6A3  | 1.13451  |
| COL2A1  | 1.12277  |
| BAMBI   | 1.05446  |
| RDH10   | 0.978624 |
| ADAMTS9 | 0.87749  |
| COL6A1  | 0.836    |

(C) Genes significantly downregulated by sh-ZNF691

| Gene list   | log <sub>2</sub> -fold-change |
|-------------|-------------------------------|
| FOSB        | -7.20419                      |
| FOS         | -4.69166                      |
| TOX         | -2.91714                      |
| KLF4        | -2.87287                      |
| MIR1263     | -2.40381                      |
| DUSP1       | -2.30706                      |
| ARC         | -2.19869                      |
| EGR1        | -2.16924                      |
| SLC27A6     | -2.06807                      |
| GDF15       | -1.99919                      |
| CYP26A1     | -1.84019                      |
| JUN         | -1.78372                      |
| EGR3        | -1.70323                      |
| IER2        | -1.55566                      |
| PMAIP1      | -1.49063                      |
| EGR2        | -1.47525                      |
| CACNA1H     | -1.43445                      |
| ZNF516      | -1.4296                       |
| LEFTY2      | -1.34619                      |
| UNC13A      | -1.33111                      |
| SNHG7,SNOR  | -1.32933                      |
| ZFP36       | -1.32089                      |
| MYH6        | -1.24264                      |
| HTR7        | -1.21323                      |
| CDKN1A      | -1.18198                      |
| CYR61       | -1.15118                      |
| SLC40A1     | -1.08015                      |
| ANKRD1      | -1.07874                      |
| NTS         | -1.06782                      |
| POU5F1      | -0.981822                     |
| PPP1R15A    | -0.978497                     |
| PLK2        | -0.959135                     |
| EHD3        | -0.874311                     |
| OR52N4,TRIM | -0.83255                      |

|          |           |
|----------|-----------|
| PRDM14   | -0.817699 |
| BTG2     | -0.800708 |
| SERPINE1 | -0.792314 |
| CTGF     | -0.776492 |

(D) Genes significantly upregulated by sh-ZNF691

| Gene list      | log <sub>2</sub> -fold-change |
|----------------|-------------------------------|
| HAPLN1         | 3.06761                       |
| RN7SK          | 2.86994                       |
| COL3A1,MIR302C | 2.37753                       |
| RPPH1          | 2.16088                       |
| MEOX1          | 2.15139                       |
| RMRP           | 1.98027                       |
| SNORD3A        | 1.84055                       |
| MSX1           | 1.33546                       |
| RHBDL3         | 1.26524                       |
| NOG            | 1.25016                       |
| HTRA1          | 1.21944                       |
| COL2A1         | 1.21517                       |
| FRZB           | 1.19575                       |
| NR2F1          | 1.14323                       |
| CDH11          | 1.11788                       |
| LRRN3          | 1.067                         |
| ARL4C          | 1.05996                       |
| TAGLN          | 1.02811                       |
| DACT1          | 1.01941                       |
| RN7SL1         | 0.989157                      |
| LRP2           | 0.984936                      |
| GREM1          | 0.971817                      |
| SORBS2         | 0.957809                      |
| RN7SL2         | 0.943898                      |
| LIX1           | 0.942753                      |
| SOX9           | 0.936796                      |
| ITGA9          | 0.932969                      |
| IGFBP5         | 0.918005                      |
| SLC7A11        | 0.915311                      |
| RGS5           | 0.914356                      |
| FZD2           | 0.879295                      |
| RDH10          | 0.867611                      |
| FGFBP3         | 0.856321                      |
| ATP4A          | 0.828382                      |
| ILDR2          | 0.802873                      |
| COL11A1        | 0.796979                      |
| HUNK           | 0.77926                       |
| PAX3           | 0.775382                      |

|             |          |
|-------------|----------|
| DISP1       | 0.761682 |
| ID3         | 0.750814 |
| PKDCC       | 0.745005 |
| PTCH1       | 0.735864 |
| HYMAI,PLAGL | 0.651824 |
| ID2         | 0.645869 |
| DSP         | 0.616858 |

(E) Genes significantly downregulated by sh-VPS45

| Gene list | log <sub>2</sub> -fold-change |
|-----------|-------------------------------|
| FOSB      | -7.68599                      |
| FOS       | -4.94366                      |
| ANKRD1    | -4.19894                      |
| HOXB9     | -4.14594                      |
| PCDH7     | -4.01605                      |
| FMOD      | -3.72444                      |
| MYL7      | -3.42664                      |
| MYLK3     | -3.30605                      |
| SEMA6D    | -3.05695                      |
| DGKB      | -2.96941                      |
| LEFTY2    | -2.79322                      |
| KLF4      | -2.75035                      |
| SH3GL2    | -2.53431                      |
| SLC27A6   | -2.49722                      |
| KRT19     | -2.4812                       |
| EGR1      | -2.4359                       |
| CYP26A1   | -2.42114                      |
| EGR3      | -2.3515                       |
| TNF       | -2.34463                      |
| DUSP1     | -2.31374                      |
| HAND1     | -2.28721                      |
| SLC40A1   | -2.22794                      |
| EGR2      | -2.19082                      |
| ACTC1     | -2.16748                      |
| BMPER     | -2.1538                       |
| LOXL4     | -2.07291                      |
| ARC       | -2.01035                      |
| CYR61     | -1.98109                      |
| GATA6     | -1.97977                      |
| COLEC12   | -1.97523                      |
| JUN       | -1.90003                      |
| GATA4     | -1.88096                      |
| LHX1      | -1.82141                      |
| ADAMTS6   | -1.7594                       |
| DLL3      | -1.75619                      |

|                |           |
|----------------|-----------|
| IER2           | -1.74324  |
| ALPK2          | -1.73871  |
| UNC5C          | -1.73579  |
| PLXNA2         | -1.63756  |
| H19,MIR675     | -1.58821  |
| COL1A2         | -1.58728  |
| ZFP36          | -1.58397  |
| COL13A1        | -1.53157  |
| SLC7A14        | -1.52878  |
| LIPG           | -1.51586  |
| CTGF           | -1.49239  |
| CER1           | -1.46372  |
| HTRA1          | -1.42278  |
| GDF15          | -1.41763  |
| SOST           | -1.34637  |
| FAM89A,MIR11   | -1.30874  |
| DLX5           | -1.30293  |
| COL2A1         | -1.29453  |
| MYH6           | -1.28147  |
| IGF2,INS,INS-I | -1.20574  |
| RGS16          | -1.19584  |
| BMP4           | -1.18937  |
| FBN2           | -1.10327  |
| RMRP           | -1.0688   |
| VEGF           | -1.03039  |
| FOXC1          | -1.01329  |
| PPP1R15A       | -0.943602 |
| FN1            | -0.942187 |
| IER3           | -0.907062 |
| PCDH10         | -0.9053   |
| DUSP6          | -0.882344 |
| SAT1           | -0.870932 |
| APLN           | -0.864792 |
| SERPINE1       | -0.808872 |
| ENC1           | -0.791225 |
| ANKRD33B       | -0.776967 |
| ADAMTS12       | -0.757723 |
| RHOB           | -0.682941 |

(F) Genes significantly upregulated by sh-VPS45

| Gene list | log <sub>2</sub> -fold-change |
|-----------|-------------------------------|
| CA9       | 1.82724                       |
| EPHA3     | 1.60351                       |
| STC2      | 1.49174                       |
| GPC6      | 1.27863                       |

|        |          |
|--------|----------|
| PRDM14 | 1.11244  |
| PDZD4  | 0.999355 |
| OLIG3  | 0.877604 |
| PFKFB4 | 0.771154 |
| DPYSL3 | 0.682752 |

(G) Genes significantly downregulated by sh-ITGB3BP

| Gene list    | log <sub>2</sub> -fold-change |
|--------------|-------------------------------|
| ANKRD1       | <b>-2.05243</b>               |
| PDIA5        | <b>-1.65339</b>               |
| HR           | <b>-1.44687</b>               |
| SMR3B        | <b>-1.40264</b>               |
| LMLN         | <b>-1.23999</b>               |
| PSTPIP2      | <b>-1.16588</b>               |
| CYP24A1      | <b>-1.15361</b>               |
| PPYR1        | <b>-1.11689</b>               |
| TRIM31       | <b>-1.02658</b>               |
| TCF4         | <b>-1.01072</b>               |
| SNCG         | <b>-1.00987</b>               |
| CLIC3        | <b>-0.970617</b>              |
| FNDC3A       | <b>-0.954996</b>              |
| C1orf51      | <b>-0.9483</b>                |
| DCAF12L1     | <b>-0.933145</b>              |
| TFPI2        | <b>-0.92686</b>               |
| C22orf32     | <b>-0.923105</b>              |
| SDPR         | <b>-0.896883</b>              |
| TMED8        | <b>-0.889374</b>              |
| DDAH1        | <b>-0.871154</b>              |
| PLOD2        | <b>-0.866413</b>              |
| KRT7,LINC005 | <b>-0.865006</b>              |
| APOL3        | <b>-0.821783</b>              |
| IL1B         | <b>-0.806726</b>              |
| SELK         | <b>-0.770966</b>              |
| RRAD         | <b>-0.770155</b>              |
| CDH16        | <b>-0.752899</b>              |
| AMMECR1      | <b>-0.742981</b>              |
| C1QL1        | <b>-0.739194</b>              |
| PER3         | <b>-0.730809</b>              |
| TEF          | <b>-0.711282</b>              |
| PDE3A        | <b>-0.710818</b>              |
| NCAM2        | <b>-0.709616</b>              |



|            |           |
|------------|-----------|
| USO1       | -0.703489 |
| PRKCH      | -0.697559 |
| KDM5C      | -0.695136 |
| COX17      | -0.691002 |
| SLC25A4    | -0.687359 |
| NEK7       | -0.664502 |
| GAS2L3     | -0.641248 |
| FAF2       | -0.62412  |
| PNMT       | -0.623833 |
| PHGDH      | -0.622662 |
| UNC13D     | -0.606739 |
| HABP4      | -0.600667 |
| ZNF781     | -0.592096 |
| ZNF681     | -0.590637 |
| ARHGAP18   | -0.581491 |
| FAM96A     | -0.577954 |
| UBE2L6     | -0.573912 |
| FGF2       | -0.561123 |
| PSMD1      | -0.550202 |
| WDR37      | -0.544056 |
| SEMA4B     | -0.542844 |
| THBS1      | -0.541295 |
| MALL,NPHP1 | -0.538007 |
| NNMT       | -0.531081 |
| SLC25A30   | -0.526159 |
| MMP1       | -0.518944 |
| RPL7L1     | -0.516534 |
| ARL6IP5    | -0.515401 |
| CDV3       | -0.48092  |
| AFAP1L2    | -0.480565 |
| STRADB     | -0.479903 |
| GM2A       | -0.478326 |
| ZNF486     | -0.470985 |
| ACLY       | -0.470924 |
| KIAA1161   | -0.467725 |
| ADCY9      | -0.465931 |
| GTSE1      | -0.460251 |
| IRF1       | -0.457724 |
| COL5A2     | -0.454961 |
| PMEPA1     | -0.451757 |

|          |           |
|----------|-----------|
| CD2AP    | -0.444223 |
| SNX6     | -0.440644 |
| KRT19    | -0.437081 |
| PDZK1IP1 | -0.436235 |
| CES2     | -0.429953 |
| APOL1    | -0.412931 |
| RUVBL2   | -0.410636 |

(H) Genes significantly upregulated by sh-ITGB3BP

| Gene list      | log <sub>2</sub> -fold-change |
|----------------|-------------------------------|
| MIR2682        | 5.56676                       |
| SNHG11,SNOF    | 4.42231                       |
| SERPINB7       | 3.70128                       |
| ST8SIA6        | 1.91257                       |
| IL33           | 1.56824                       |
| NTNG2          | 1.5664                        |
| PARM1          | 1.47642                       |
| CORO2B         | 1.47444                       |
| DNER           | 1.45377                       |
| NDNF           | 1.45333                       |
| PI16           | 1.44019                       |
| SCEL           | 1.42307                       |
| EREG           | 1.41966                       |
| TMPRSS4        | 1.35359                       |
| IL13RA2        | 1.33741                       |
| RN7SL2         | 1.33465                       |
| PAX2           | 1.20716                       |
| CPAMD8         | 1.17514                       |
| PRDM1          | 1.17122                       |
| CXorf22,CXorf2 | 1.16835                       |
| CD69           | 1.15797                       |
| COL8A1         | 1.06633                       |
| OSCAR          | 1.02886                       |
| JPH1           | 1.02744                       |
| TP63           | 1.01335                       |
| SLC22A17       | 1.01007                       |
| WDFY4          | 0.987767                      |
| NCALD          | 0.978979                      |
| PPARGC1A       | 0.975126                      |
| MEOX1          | 0.97466                       |

|               |          |
|---------------|----------|
| RN7SL1        | 0.968892 |
| FLRT2         | 0.957731 |
| MAPK8IP2      | 0.956275 |
| THSD4         | 0.954543 |
| AREG          | 0.92796  |
| CCDC64        | 0.922365 |
| SERPINA1      | 0.88819  |
| WNT5A         | 0.85809  |
| FOXQ1         | 0.847851 |
| DACT1         | 0.834616 |
| LBH           | 0.834042 |
| ARL14EPL      | 0.828242 |
| ZNF423        | 0.80379  |
| BACH2         | 0.789203 |
| FAM198B       | 0.773284 |
| SIX3          | 0.766906 |
| INHBB         | 0.766513 |
| C9orf47,S1PR3 | 0.765652 |
| LIPG          | 0.748481 |
| FNDC1         | 0.739001 |
| DPP4          | 0.737751 |
| MCAM          | 0.732712 |
| BOLA2         | 0.719968 |
| C14orf132     | 0.716352 |
| TMTC1         | 0.707114 |
| LRRC38        | 0.696591 |
| ELFN1         | 0.691723 |
| NOV           | 0.648431 |
| KCNJ16        | 0.645769 |
| PGBD5         | 0.639343 |
| TNFRSF11B     | 0.633991 |
| C1orf116      | 0.631904 |
| ARNTL         | 0.628596 |
| SAMD12        | 0.628589 |
| CLDN16        | 0.627735 |
| MTRNR2L8      | 0.622668 |
| AIM1          | 0.608147 |
| TMEM47        | 0.60778  |
| SMOC2         | 0.605006 |
| CRABP2        | 0.603325 |

|          |          |
|----------|----------|
| LIN28A   | 0.598212 |
| C1S      | 0.597727 |
| SLC1A3   | 0.593477 |
| SEPT3    | 0.592115 |
| SLC36A1  | 0.590216 |
| NPAS2    | 0.588527 |
| NOTCH3   | 0.583231 |
| KIAA1211 | 0.570221 |
| CPS1     | 0.568441 |
| LAMC2    | 0.561917 |
| DUSP5    | 0.556892 |
| C2orf72  | 0.550712 |
| GPR110   | 0.547833 |
| NDRG4    | 0.543185 |
| IGFBP6   | 0.540565 |
| PEG10    | 0.52883  |
| SEMA6A   | 0.525957 |
| PLSCR4   | 0.52542  |
| VNN1     | 0.521925 |
| SEL1L3   | 0.520235 |
| PGPEP1   | 0.514597 |
| EDN1     | 0.506976 |
| MAL2     | 0.506565 |
| BAI2     | 0.498963 |
| FERMT1   | 0.496004 |
| GPRC5B   | 0.489996 |
| AKAP12   | 0.489536 |
| PXDN     | 0.480641 |
| MICAL2   | 0.478865 |
| CDH5     | 0.473065 |
| TUB      | 0.435212 |
| TNFSF10  | 0.426957 |
| HSPA1A   | 0.421592 |

(I) Genes significantly downregulated by sh-TLE2

| Gene list | log <sub>2</sub> -fold-change |
|-----------|-------------------------------|
| VNN1      | -4.37179                      |
| AQP3      | -4.08992                      |
| IDO1      | -4.01947                      |
| C12orf36  | -3.95307                      |

|              |          |
|--------------|----------|
| VNN2         | -3.90216 |
| MEFV         | -3.81621 |
| LTB          | -3.79239 |
| TM4SF18      | -3.65406 |
| TM4SF18      | -3.65406 |
| HLA-DMB      | -3.44505 |
| LOC100130417 | -3.39162 |
| SAA2,SAA2-SA | -3.2952  |
| DHRS3        | -3.2918  |
| MUC1         | -3.26725 |
| C8orf4       | -3.24409 |
| ALOX5        | -3.23775 |
| AKR1C1       | -3.19765 |
| CLIC3        | -3.12111 |
| MAL          | -3.08857 |
| LOC100506328 | -3.07431 |
| MMRN2        | -2.85374 |
| IL1R2        | -2.8002  |
| ICAM1        | -2.79104 |
| SMPDL3B      | -2.74211 |
| GOLT1A       | -2.69101 |
| TM7SF2       | -2.67388 |
| TNFSF10      | -2.65972 |
| CLDN10       | -2.63356 |
| KCNQ1        | -2.6007  |
| LOC113230    | -2.57399 |
| GBP2         | -2.55418 |
| IGFBP3       | -2.51624 |
| SERPINA6     | -2.50714 |
| KIF6         | -2.49922 |
| BASP1P1      | -2.49804 |
| BASP1P1      | -2.49804 |
| PRKCG        | -2.49545 |
| G0S2         | -2.48563 |
| PCSK4        | -2.46641 |
| SEPP1        | -2.44493 |
| AKR1C2       | -2.39667 |
| ALDH3A1      | -2.3835  |
| MMP7         | -2.37314 |
| CRYM         | -2.35323 |

|              |          |
|--------------|----------|
| SOD2         | -2.35208 |
| CA11         | -2.34262 |
| HRASLS2      | -2.33688 |
| WISP2        | -2.33649 |
| CYP26A1      | -2.32434 |
| LEMD1,MIR135 | -2.32166 |
| CASP1        | -2.32056 |
| ZNF323       | -2.31401 |
| SGPP2        | -2.30748 |
| LIPC         | -2.30108 |
| LIPC         | -2.30108 |
| AKR1C3       | -2.29396 |
| SLC22A18     | -2.2935  |
| RNF144B      | -2.2897  |
| DDIT4        | -2.28757 |
| SDPR         | -2.28166 |
| HSD17B14     | -2.27157 |
| CDH16        | -2.25662 |
| SHISA3       | -2.23988 |
| CALHM3       | -2.23859 |
| PBXIP1       | -2.2313  |
| IL33         | -2.22574 |
| SLC14A2      | -2.21246 |
| APOL3        | -2.20847 |
| TLE2         | -2.19856 |
| IFIT2        | -2.19804 |
| CEBPD        | -2.19776 |
| IFIT1        | -2.1972  |
| SAA1         | -2.19713 |
| RASAL1       | -2.19382 |
| MPZL2        | -2.18783 |
| PPL          | -2.17867 |
| ADHFE1       | -2.13255 |
| GPR110       | -2.11603 |
| MMP1         | -2.08901 |
| LOC100506085 | -2.08564 |
| PRPH         | -2.08186 |
| CLDN3        | -2.07718 |
| LOC100506007 | -2.07525 |
| PP13         | -2.07456 |

|                   |          |
|-------------------|----------|
| CP                | -2.0705  |
| SNCG              | -2.06285 |
| LOC100507656      | -2.05506 |
| C7orf29,LRRC6     | -2.05393 |
| CFH               | -2.03813 |
| IL1B              | -2.0359  |
| KIF12             | -2.03317 |
| EPSTI1            | -2.0218  |
| LOC100131551      | -2.01411 |
| MMP28             | -2.00569 |
| WFDC2             | -1.9957  |
| NR3C2             | -1.97482 |
| REEP6             | -1.96324 |
| C2orf88           | -1.96103 |
| LGALS9            | -1.95661 |
| SULT1C2           | -1.95063 |
| SULT1C2           | -1.95063 |
| CEACAM20,CEACAM20 | -1.94804 |
| RARRES3           | -1.9459  |
| CDK18             | -1.92288 |
| LMO1              | -1.91502 |
| TRAPPC6A          | -1.91351 |
| FLRT3             | -1.8935  |
| CDH1              | -1.88258 |
| DNAJC22           | -1.8821  |
| C1QTNF1           | -1.88079 |
| LOC100996451      | -1.86576 |
| BMF               | -1.84962 |
| PARK2             | -1.84776 |
| PNMT              | -1.84288 |
| KIAA1211L         | -1.84208 |
| IL1R1             | -1.83589 |
| GPM6A             | -1.83166 |
| SLC44A5           | -1.83158 |
| NXNL2             | -1.82957 |
| ANXA4             | -1.81221 |
| NTSR1             | -1.80298 |
| C3                | -1.79959 |
| RCAN2             | -1.79806 |
| SSPN              | -1.78804 |

|               |          |
|---------------|----------|
| OCEL1         | -1.78509 |
| GBP5          | -1.78427 |
| YPEL3         | -1.78143 |
| UGT1A1,UGT1   | -1.7812  |
| TNFRSF11B     | -1.7778  |
| CYP1B1-AS1    | -1.77438 |
| CYP1B1-AS1    | -1.77438 |
| ITGB8         | -1.76827 |
| CFB           | -1.76388 |
| CA12          | -1.76295 |
| NEURL3        | -1.75629 |
| DDIT4L        | -1.75436 |
| TRIM2         | -1.74972 |
| YPEL2         | -1.74918 |
| LOC440461     | -1.74846 |
| STAP2         | -1.74814 |
| CYP1B1        | -1.74053 |
| OR1N2         | -1.73595 |
| PRR15         | -1.73431 |
| TCP11L2       | -1.73001 |
| BAIAP2L2,PLA2 | -1.72274 |
| TMEM45B       | -1.71828 |
| ASS1          | -1.71547 |
| TNFAIP2       | -1.71294 |
| LOX           | -1.71171 |
| GPRC5C        | -1.69924 |
| TMEM47        | -1.68958 |
| CALCOCO1      | -1.68136 |
| HIST1H2AI,HIS | -1.68096 |
| SH2B2         | -1.66909 |
| B3GNT3        | -1.66582 |
| DSCAML1       | -1.6658  |
| WDR96         | -1.66414 |
| IMPA2         | -1.6637  |
| PDK4          | -1.66202 |
| HIST1H3E      | -1.65731 |
| DICER1-AS1    | -1.65693 |
| ALOX12        | -1.65589 |
| C1RL          | -1.65273 |
| QPRT          | -1.64762 |



|              |          |
|--------------|----------|
| HID1         | -1.64213 |
| PAR6A        | -1.64208 |
| ELF3         | -1.64111 |
| ALDOC        | -1.62511 |
| C1S          | -1.62449 |
| DYRK1B       | -1.62316 |
| LHPP         | -1.62283 |
| FAM20C       | -1.62103 |
| PBX1         | -1.62003 |
| PNRC1        | -1.61299 |
| HSD11B1L     | -1.60948 |
| RNF208       | -1.60913 |
| ABCA3        | -1.60189 |
| CXCR4        | -1.60186 |
| C8orf34      | -1.60154 |
| SAT1         | -1.58401 |
| SAT1         | -1.58401 |
| SPEF1        | -1.58102 |
| AK8          | -1.58045 |
| RAB26        | -1.57804 |
| MIR4800,MXD4 | -1.57697 |
| DNAJC28      | -1.57633 |
| CLEC11A      | -1.57396 |
| EDIL3        | -1.57392 |
| SPTLC3       | -1.5719  |
| IL1A         | -1.56938 |
| PLL1         | -1.56533 |
| LSAMP        | -1.56151 |
| TSPAN7       | -1.55845 |
| ACBD4        | -1.54942 |
| BTBD19       | -1.54722 |
| THBS4        | -1.54671 |
| CXCL2        | -1.54427 |
| MACROD2      | -1.54304 |
| MACROD2      | -1.54304 |
| GNG7         | -1.53645 |
| CASP10       | -1.53469 |
| LOC100507661 | -1.53172 |
| C2orf15      | -1.53026 |
| CYB5R3       | -1.52995 |

|               |          |
|---------------|----------|
| WNT10A        | -1.52625 |
| ETV7          | -1.52405 |
| ETV1          | -1.52105 |
| TACSTD2       | -1.51581 |
| CSF1          | -1.51567 |
| KLHL24        | -1.51426 |
| CREBRF        | -1.51294 |
| LMO2          | -1.49545 |
| PDZK1IP1      | -1.49401 |
| NOV           | -1.48465 |
| DCAF12L1      | -1.48456 |
| C6orf223      | -1.48257 |
| MIR210,MIR211 | -1.48083 |
| CTSF          | -1.47887 |
| SMOC2         | -1.47533 |
| FLJ22184      | -1.47252 |
| BMS1P5        | -1.46989 |
| SLC16A2       | -1.46799 |
| CERS4         | -1.46785 |
| SLC2A12       | -1.45938 |
| DNAAF3,TNNK   | -1.45851 |
| IER5L         | -1.45649 |
| SOD3          | -1.45018 |
| FTCD          | -1.44874 |
| CGNL1         | -1.44303 |
| ITGB4         | -1.43893 |
| FBXO32        | -1.43721 |
| NDRG1         | -1.4352  |
| CITED4        | -1.43231 |
| C17orf103     | -1.42694 |
| TUBB4A        | -1.42598 |
| COL16A1       | -1.41853 |
| AMTN          | -1.41829 |
| DBP           | -1.41636 |
| RSPH1         | -1.41246 |
| BCAT1         | -1.399   |
| GPX3          | -1.39673 |
| OSCAR         | -1.39586 |
| CNFN          | -1.3909  |
| FP588         | -1.38623 |

|              |          |
|--------------|----------|
| SRCIN1       | -1.38538 |
| C11orf70     | -1.3821  |
| ZFYVE28      | -1.37831 |
| TRIB2        | -1.37749 |
| OAS1         | -1.37628 |
| CRB3         | -1.37422 |
| ABCC3        | -1.37399 |
| ACSS3        | -1.37137 |
| GATSL3       | -1.3712  |
| KYNU         | -1.37069 |
| CAMK2B       | -1.37054 |
| LOC100507634 | -1.36897 |
| ZC3H12A      | -1.36856 |
| LOC728730    | -1.36245 |
| FOXA2,LINC00 | -1.36142 |
| INSL3,JAK3   | -1.36094 |
| FAM66C       | -1.3577  |
| ALDH3B1      | -1.35708 |
| SMARCD3      | -1.34989 |
| TSPAN1       | -1.34931 |
| ADC          | -1.34746 |
| PGPEP1       | -1.34438 |
| COL8A1       | -1.34364 |
| MARCKS       | -1.34149 |
| CCDC30       | -1.34083 |
| HES2         | -1.33953 |
| SHC2         | -1.33877 |
| ATP8A1       | -1.33728 |
| FOS          | -1.33673 |
| ORAI3        | -1.33348 |
| FTH1         | -1.32973 |
| MAPT         | -1.32864 |
| PIANP        | -1.32769 |
| LOC100270746 | -1.3233  |
| LOC388210,LC | -1.31926 |
| HOTAIRM1     | -1.31917 |
| NRG2         | -1.31801 |
| BFSP1        | -1.31749 |
| C14orf159    | -1.31732 |
| ESR1         | -1.31506 |

|               |          |
|---------------|----------|
| NOXA1         | -1.31155 |
| VDR           | -1.30887 |
| LMTK3         | -1.30702 |
| MST1          | -1.30619 |
| LYRM9         | -1.30245 |
| PLEKHA4       | -1.30004 |
| ACSF2         | -1.29786 |
| LOC100128822  | -1.29781 |
| LOC254896, TM | -1.29621 |
| TSC22D3       | -1.29371 |
| PLA2G16       | -1.28968 |
| OR1F1         | -1.28924 |
| RNASET2       | -1.28808 |
| BCL6          | -1.2861  |
| PCDH7         | -1.28571 |
| LINC00472     | -1.28521 |
| CD70          | -1.28503 |
| GPR173        | -1.27989 |
| COMMD9        | -1.27949 |
| ABTB1         | -1.27909 |
| CCL28         | -1.27887 |
| CTSO          | -1.27709 |
| IFITM1,IFITM2 | -1.27685 |
| MMP13         | -1.27208 |
| LOC100288911  | -1.26995 |
| FOXO1         | -1.26815 |
| ARHGAP24      | -1.26621 |
| KIF17         | -1.26597 |
| HIST1H2AC     | -1.26155 |
| EGLN3         | -1.25898 |
| RASSF6        | -1.25667 |
| GATS          | -1.25437 |
| SLC16A3       | -1.25425 |
| MXRA5         | -1.25401 |
| TLCD2         | -1.25306 |
| EFNB3         | -1.24899 |
| CCNG2         | -1.24881 |
| GYG2          | -1.24638 |
| BATF2         | -1.24317 |
| MMP11         | -1.24255 |

|              |          |
|--------------|----------|
| LOC100272217 | -1.23774 |
| STC1         | -1.2364  |
| ZNF114       | -1.23378 |
| LOC339535    | -1.23229 |
| YBX2         | -1.23118 |
| KLC4         | -1.23111 |
| CTXN1        | -1.2291  |
| LOC100507635 | -1.22659 |
| SYTL1        | -1.22412 |
| HNMT         | -1.22214 |
| LRG1         | -1.22113 |
| CCL20        | -1.22109 |
| SYT11        | -1.21953 |
| EFNA1        | -1.21915 |
| SOX12        | -1.21847 |
| RHBDL2       | -1.21262 |
| PDE3A        | -1.21216 |
| A4GALT       | -1.21183 |
| CALHM2       | -1.2112  |
| FUCA1        | -1.20876 |
| ZNF396       | -1.20871 |
| LINC00511    | -1.20513 |
| HBP1         | -1.2045  |
| ATP8B1       | -1.20267 |
| RND1         | -1.20253 |
| C19orf66     | -1.20244 |
| CNGA1        | -1.20158 |
| FOXO4        | -1.19905 |
| DENND1C      | -1.19869 |
| TFEB         | -1.19808 |
| IFIT3        | -1.19787 |
| TMEM92       | -1.19729 |
| LRRC17       | -1.19567 |
| KLHDC9       | -1.1946  |
| TRIM46       | -1.19369 |
| HIST2H2BE    | -1.19318 |
| FCGRT        | -1.19312 |
| ZNF852       | -1.19163 |
| LOC100132995 | -1.1907  |
| PLA2G4C      | -1.18764 |

|               |          |
|---------------|----------|
| NCAM2         | -1.18762 |
| RAPGEF3       | -1.18652 |
| AK7           | -1.18556 |
| SNAI3-AS1     | -1.18394 |
| CLDN4         | -1.18357 |
| SLC18B1       | -1.18099 |
| PAPLN         | -1.17909 |
| NRP1          | -1.1759  |
| FAM131B       | -1.17527 |
| ACBD7         | -1.17274 |
| GPR56         | -1.17165 |
| ROPN1L        | -1.17105 |
| PDE9A         | -1.17058 |
| PTX3          | -1.16951 |
| C12orf52,TPC1 | -1.16792 |
| C1QL4         | -1.16759 |
| CXCL3         | -1.16655 |
| GRB7          | -1.16554 |
| PTGER2        | -1.16454 |
| PLAC8         | -1.16427 |
| TMEM129       | -1.16361 |
| ATP2A3        | -1.16345 |
| UBE2L6        | -1.16281 |
| FKBP7         | -1.16259 |
| TBKBP1        | -1.16252 |
| CRIP2         | -1.16155 |
| NCKAP5L       | -1.16125 |
| DDO           | -1.16028 |
| TMEM150A      | -1.15797 |
| PCDHB7        | -1.15459 |
| FADS2         | -1.15447 |
| PLVAP         | -1.15386 |
| KDM6B         | -1.15336 |
| ANKRD20A19F   | -1.15306 |
| OAS2          | -1.15245 |
| SLC25A27      | -1.15229 |
| BSPRY         | -1.15084 |
| SLC27A2       | -1.15064 |
| REEP2         | -1.14873 |
| GLT8D2        | -1.14397 |

|                       |          |
|-----------------------|----------|
| LOC100508120          | -1.14266 |
| GRN                   | -1.13955 |
| EGFEM1P               | -1.13936 |
| FLJ22447              | -1.13862 |
| NAT14                 | -1.13707 |
| LINC00648             | -1.13514 |
| CES3                  | -1.13433 |
| CADM1                 | -1.13282 |
| EPCAM                 | -1.13227 |
| VAV3                  | -1.13141 |
| FKBP8                 | -1.13092 |
| C12orf55,LOC100508120 | -1.1308  |
| LCN2                  | -1.13016 |
| RHPN1                 | -1.12957 |
| KLHL14                | -1.12483 |
| APOL1                 | -1.12003 |
| SEMA3B                | -1.11631 |
| TLR5                  | -1.11599 |
| BEX4                  | -1.11358 |
| FAM19A5               | -1.11327 |
| B3GNT4                | -1.11088 |
| HIST3H2A              | -1.11079 |
| FOXQ1                 | -1.10844 |
| SPATA17               | -1.10752 |
| C1R                   | -1.10681 |
| C1R                   | -1.10681 |
| PLCD3                 | -1.10676 |
| P2RY6                 | -1.10624 |
| CDKN1C                | -1.10608 |
| PTP4A3                | -1.10296 |
| IL8                   | -1.10232 |
| IRF2BPL               | -1.09999 |
| TP53INP1              | -1.09884 |
| SPON1                 | -1.09803 |
| PHLDA1                | -1.09694 |
| LOC100507406          | -1.09335 |
| BNIP3L                | -1.09279 |
| OXLD1                 | -1.09242 |
| FAM43A                | -1.09094 |
| PGAP3                 | -1.088   |

|                |          |
|----------------|----------|
| LOC100129781   | -1.08735 |
| BCL3           | -1.08619 |
| LOC100506057   | -1.08571 |
| PAQR8          | -1.085   |
| C21orf119      | -1.08491 |
| C20orf96       | -1.08027 |
| LOC100129596   | -1.07976 |
| TOX2           | -1.07974 |
| ANG,RNASE4     | -1.07971 |
| FAM117A        | -1.07905 |
| BBC3           | -1.07689 |
| NPDC1          | -1.07687 |
| TNF            | -1.07584 |
| CYS1           | -1.07538 |
| KCNJ11         | -1.074   |
| HCFC1R1        | -1.07264 |
| ABCD1          | -1.07163 |
| CTSD           | -1.07014 |
| PCDHB4         | -1.06982 |
| GHDC           | -1.06958 |
| ARRDC1         | -1.06917 |
| HGD            | -1.06879 |
| PTGIS          | -1.06816 |
| LOC153684      | -1.06643 |
| LOC100507316   | -1.06516 |
| C15orf48       | -1.06509 |
| CCDC69         | -1.06197 |
| CXorf22,CXorf2 | -1.06126 |
| GDPD1          | -1.06075 |
| SLC2A11        | -1.06055 |
| PCSK1N         | -1.06035 |
| THBS3          | -1.06024 |
| JUP            | -1.05955 |
| PRUNE2         | -1.05808 |
| L1CAM          | -1.0568  |
| RASL11A        | -1.05516 |
| LOC730102,SE   | -1.05441 |
| CCDC103        | -1.05384 |
| SLC44A3        | -1.05282 |
| KRT19          | -1.05055 |



|              |          |
|--------------|----------|
| CARD6        | -1.04755 |
| IGFBP6       | -1.04648 |
| ARHGEF3      | -1.04593 |
| RTN4RL2      | -1.04487 |
| LRRC4B       | -1.04485 |
| GJD3         | -1.04445 |
| VMAC         | -1.04411 |
| GSTM4        | -1.04355 |
| FKBP1B       | -1.04194 |
| TSPAN33      | -1.03596 |
| NME3         | -1.03409 |
| SPP1         | -1.03375 |
| KLF9         | -1.03296 |
| LOC143666    | -1.03242 |
| WDR45        | -1.03037 |
| MTMR9LP      | -1.03026 |
| SMAD6        | -1.0279  |
| LOC441204    | -1.02647 |
| DHRS1        | -1.02622 |
| SLC26A4      | -1.02454 |
| SHF          | -1.02384 |
| DNER         | -1.02042 |
| SLPI         | -1.01897 |
| SEC31B       | -1.01865 |
| UPK3B        | -1.0185  |
| MCTP1        | -1.01821 |
| C14orf132    | -1.01818 |
| LINC00663    | -1.01727 |
| ACP6         | -1.01667 |
| SLC27A1      | -1.01538 |
| SCD5         | -1.01471 |
| FAM173A      | -1.01354 |
| MIR4680,PDCE | -1.01186 |
| HCP5         | -1.01063 |
| PAOX         | -1.01061 |
| CACNA1H      | -1.00986 |
| SEZ6L2       | -1.00907 |
| KCNK5        | -1.00741 |
| LOC151009    | -1.00713 |
| FIG4         | -1.00603 |

|                     |           |
|---------------------|-----------|
| BHLHE41             | -1.0026   |
| TMEM159             | -1.0025   |
| LOC729013           | -1.00233  |
| LOC653160           | -1.00155  |
| TENM1               | -1.0004   |
| PLCD1               | -0.999625 |
| LLGL2               | -0.998299 |
| LPHN3               | -0.996763 |
| FBXL16              | -0.993591 |
| RRAGB               | -0.991669 |
| PI16                | -0.991283 |
| C20orf112           | -0.991174 |
| ICAM5               | -0.99098  |
| TMEM169             | -0.990852 |
| DBNDD1              | -0.989503 |
| ZNF579              | -0.988241 |
| SCG2                | -0.98659  |
| ZC3H12B             | -0.986062 |
| GAMT                | -0.985138 |
| FGFBP1              | -0.983633 |
| ZNF580,ZNF581       | -0.983313 |
| TCEA2               | -0.981681 |
| SEMA3A              | -0.980781 |
| LINC00534           | -0.977829 |
| CCNA1               | -0.976953 |
| FZD1                | -0.976835 |
| FAM85A,LOC100288798 | -0.976336 |
| DUSP6               | -0.973368 |
| INPP5J              | -0.971195 |
| LOC100288798        | -0.971084 |
| TFPI                | -0.970126 |
| FBP2                | -0.96973  |
| FZD2                | -0.968556 |
| NMUR2               | -0.968165 |
| PPP1R1B,STAI1       | -0.96765  |
| SLC26A11            | -0.965918 |
| DPYD                | -0.965258 |
| TNFSF12,TNFR1       | -0.964756 |
| CPA4                | -0.964236 |
| TMEM121             | -0.963394 |

|              |           |
|--------------|-----------|
| ZSWIM5       | -0.963087 |
| ARSE         | -0.960538 |
| LOC100507056 | -0.960065 |
| MOSPD3       | -0.958376 |
| NNMT         | -0.958371 |
| BEX2         | -0.955937 |
| AKR1B1       | -0.955633 |
| ZNF358       | -0.955301 |
| RINL         | -0.953839 |
| LOC440894    | -0.953141 |
| CHRD         | -0.95236  |
| ARRDC3       | -0.952239 |
| CYP39A1      | -0.951744 |
| CTSS         | -0.950049 |
| LONRF3       | -0.949772 |
| ROGDI        | -0.947969 |
| HS3ST1       | -0.946349 |
| SREBF1       | -0.945817 |
| SLFN5        | -0.945246 |
| MALL,NPHP1   | -0.944902 |
| DENND2D      | -0.94393  |
| THNSL2       | -0.942888 |
| PCOLCE       | -0.942407 |
| SALL2        | -0.942075 |
| EHF          | -0.942049 |
| DPM3         | -0.942006 |
| DPP4         | -0.940819 |
| MARCH9       | -0.940313 |
| KIAA0408,SOG | -0.939735 |
| SUSD3        | -0.939719 |
| UBXN6        | -0.938567 |
| C17orf100    | -0.937895 |
| GPR153       | -0.937624 |
| MLXIPL       | -0.936426 |
| MYL6B        | -0.936124 |
| KCNC3        | -0.93332  |
| MOAP1        | -0.931724 |
| CCDC106      | -0.931245 |
| SLC7A7       | -0.93111  |
| KDM5B        | -0.929991 |

|             |           |
|-------------|-----------|
| MAP3K8      | -0.929186 |
| B4GALNT4    | -0.928948 |
| SLC25A23    | -0.92845  |
| SPAG4       | -0.927672 |
| UCP2        | -0.920837 |
| KLHL7-AS1   | -0.920393 |
| TM4SF1      | -0.920293 |
| FAM22A,FAM2 | -0.919039 |
| FRMD4B      | -0.918204 |
| EMID1       | -0.917072 |
| QPCT        | -0.915463 |
| BCAS3       | -0.915273 |
| CALCRL      | -0.914878 |
| SERPINI1    | -0.914618 |
| VWA5A       | -0.914296 |
| SCD         | -0.91417  |
| GUCY1B2     | -0.911701 |
| GBP1        | -0.911497 |
| VPS37D      | -0.910611 |
| GSE1        | -0.909385 |
| CXCL16      | -0.909277 |
| EPAS1       | -0.908786 |
| TMEM170B    | -0.908158 |
| ZNF219      | -0.905954 |
| SHISA4      | -0.905621 |
| ACVRL1      | -0.905204 |
| EFNB1       | -0.90339  |
| HOGA1       | -0.902485 |
| PIP5KL1     | -0.902083 |
| CAT         | -0.901662 |
| ECHDC2      | -0.901257 |
| REPS2       | -0.900759 |
| SLCO4A1     | -0.900754 |
| GSTT1       | -0.898156 |
| SLC29A2     | -0.897707 |
| FRAT1       | -0.897004 |
| RASGRP1     | -0.895677 |
| STEAP1      | -0.893796 |
| GMPR        | -0.893518 |
| PRDM8       | -0.892082 |

|              |           |
|--------------|-----------|
| PEMT         | -0.892077 |
| FN3K         | -0.890181 |
| NIPSNAP1     | -0.88884  |
| ZFPM2        | -0.88856  |
| GJB2         | -0.888408 |
| ZMYND10      | -0.887995 |
| FLYWCH2      | -0.887608 |
| TNNT1        | -0.88738  |
| DDAH2        | -0.886909 |
| FADS3        | -0.88549  |
| PTPN6        | -0.884223 |
| OSCP1        | -0.882297 |
| LOC728743    | -0.882282 |
| MIR4750,TBC1 | -0.881914 |
| TRAPPC9      | -0.881052 |
| RPH3AL       | -0.880608 |
| IFNGR1       | -0.880261 |
| NOVA2        | -0.880053 |
| FLJ39632     | -0.878761 |
| MKNK2        | -0.877726 |
| MIR920,SOX5  | -0.877687 |
| BTC          | -0.877264 |
| JUND         | -0.876037 |
| IFI16        | -0.876002 |
| IFITM3       | -0.875401 |
| RFXANK       | -0.874962 |
| ZBTB7C       | -0.874467 |
| PAQR6        | -0.87433  |
| SH3TC1       | -0.872776 |
| CEBPB        | -0.872655 |
| ZBTB7B       | -0.872162 |
| JUNB         | -0.871335 |
| MVP,PAGR1    | -0.871229 |
| FAM131C      | -0.869795 |
| HEXIM1       | -0.867943 |
| EPS8L2       | -0.866505 |
| PPARA        | -0.864647 |
| NR2F1        | -0.863955 |
| CUBN         | -0.862776 |
| SLC6A8       | -0.862668 |

|              |           |
|--------------|-----------|
| DTX1         | -0.862092 |
| KLHDC7A      | -0.861906 |
| SLAIN1       | -0.859935 |
| CAPG         | -0.859177 |
| PFKFB4       | -0.859103 |
| LYRM5        | -0.858999 |
| LOC100288152 | -0.857712 |
| PLA2R1       | -0.857683 |
| MIB2         | -0.857485 |
| ALDH6A1      | -0.856259 |
| NUPR1        | -0.854955 |
| LIPA         | -0.8516   |
| LOC100129098 | -0.851538 |
| PTPRH        | -0.851026 |
| FRK          | -0.850702 |
| WNT5A        | -0.85013  |
| ZMAT1        | -0.848167 |
| KLHDC1       | -0.846363 |
| MBTD1        | -0.846069 |
| MTHFR        | -0.845311 |
| NEAT1        | -0.844004 |
| NEIL1        | -0.843859 |
| NRBP2        | -0.843573 |
| SSH3         | -0.841173 |
| INO80B,INO80 | -0.84108  |
| TLE6         | -0.840979 |
| BCKDHA       | -0.840718 |
| MAP3K5       | -0.840239 |
| CITED2       | -0.840104 |
| CCDC85B      | -0.839622 |
| VAMP1        | -0.839343 |
| MFAP2        | -0.838251 |
| KCNRG,TRIM1  | -0.837793 |
| SNTB1        | -0.835699 |
| TMEM38A      | -0.834574 |
| GPR162       | -0.834227 |
| SPIN2B       | -0.834046 |
| TBC1D8B      | -0.833432 |
| TMEM53       | -0.831897 |
| CBLB         | -0.830866 |

|              |           |
|--------------|-----------|
| SNCA         | -0.82897  |
| NEU1         | -0.827851 |
| PRSS16       | -0.82653  |
| ACOT2        | -0.825144 |
| CES2         | -0.825016 |
| SGSH         | -0.823439 |
| YPEL5        | -0.822966 |
| UNC13A       | -0.822358 |
| CRYL1        | -0.821917 |
| PNPLA2       | -0.818688 |
| AHR          | -0.818382 |
| BCAM         | -0.818109 |
| NDRG4        | -0.818035 |
| WBSCR27      | -0.81709  |
| RAB3D,TMEM2  | -0.81609  |
| TMEM59L      | -0.813766 |
| IGFBP1       | -0.813197 |
| HOXB5,HOXB6  | -0.813048 |
| AXIN2        | -0.812246 |
| MAGEH1       | -0.812126 |
| FAM198B      | -0.81089  |
| LOC149351    | -0.810109 |
| HIBADH       | -0.809994 |
| C1RL-AS1,CLS | -0.809946 |
| ZDHHC24      | -0.809413 |
| TPGS1        | -0.809278 |
| FBXO17       | -0.808715 |
| ZNF785       | -0.808664 |
| CAPN1        | -0.808235 |
| REPIN1       | -0.80765  |
| SERPINB1     | -0.807212 |
| FA2H         | -0.806774 |
| RN7SK        | -0.805535 |
| LAPTM5       | -0.805197 |
| PLD3         | -0.801854 |
| FOLR1        | -0.801617 |
| MAL2         | -0.801536 |
| DENND6B      | -0.799937 |
| RAB13        | -0.799273 |
| GSTA4        | -0.798221 |

|              |           |
|--------------|-----------|
| GLUD2        | -0.79764  |
| LAMB2        | -0.797062 |
| PWWP2B       | -0.795219 |
| STAT6        | -0.791841 |
| PEX11G       | -0.790891 |
| NMRK1        | -0.790356 |
| PDGFRL       | -0.789881 |
| C9orf16      | -0.788711 |
| ID4          | -0.788596 |
| TTYH3        | -0.788451 |
| C12orf68     | -0.788347 |
| SOX4         | -0.787332 |
| ING4         | -0.787066 |
| IGFBP7       | -0.786744 |
| SGK223       | -0.786324 |
| SGK2         | -0.786267 |
| MAATS1       | -0.785901 |
| LOC100506119 | -0.784105 |
| HR           | -0.783589 |
| PHF21A       | -0.783577 |
| IGBP1        | -0.783513 |
| SOX17        | -0.783147 |
| PTTG1IP      | -0.782624 |
| GALT,IL11RA  | -0.781758 |
| MAP7         | -0.781159 |
| ASIC1        | -0.779039 |
| SLC35E2      | -0.778172 |
| BST1,FAM200E | -0.778081 |
| FAM8A1       | -0.777752 |
| PNMA2        | -0.776888 |
| METTL7B      | -0.771609 |
| BAIAP3       | -0.770944 |
| WDSUB1       | -0.769762 |
| C6orf162     | -0.769607 |
| ADAMTSL4     | -0.769526 |
| ANKDD1A      | -0.769397 |
| SLC29A4      | -0.769301 |
| HOOK2        | -0.767891 |
| EPHX1        | -0.767735 |
| KIAA1551     | -0.767276 |



|              |           |
|--------------|-----------|
| DNASE2       | -0.766752 |
| HIST1H1C     | -0.765298 |
| GLRX         | -0.764249 |
| ARHGAP27     | -0.76385  |
| TMEM173      | -0.762497 |
| PTH2R        | -0.762071 |
| PLEKHA7      | -0.762004 |
| PCDHB5       | -0.761889 |
| SPRED3       | -0.761447 |
| CD9          | -0.760818 |
| RARG         | -0.760425 |
| SUMF1        | -0.759843 |
| PPP1R14C     | -0.758281 |
| NR2F6        | -0.758252 |
| MATN2        | -0.758124 |
| C1orf115     | -0.757922 |
| PROS1        | -0.757749 |
| PRRX2        | -0.757041 |
| YDJC         | -0.755885 |
| DUSP4        | -0.755618 |
| TSC22D1      | -0.755254 |
| RIMKLA       | -0.75367  |
| IDH1         | -0.753644 |
| ZFP36L2      | -0.752925 |
| ARHGEF4      | -0.751955 |
| AKD1         | -0.751611 |
| CTTNBP2      | -0.750811 |
| SYNGR1       | -0.750571 |
| MPND         | -0.750157 |
| ITGB6        | -0.749778 |
| PROC         | -0.749543 |
| ARID5B       | -0.747755 |
| LOC100507303 | -0.747066 |
| EHD3         | -0.746612 |
| SPRY1        | -0.745651 |
| CMTM7        | -0.744617 |
| PDK2         | -0.744058 |
| PLD1         | -0.743988 |
| IRF7         | -0.741858 |
| TGFBR2       | -0.74163  |

|              |           |
|--------------|-----------|
| NRARP        | -0.741181 |
| BTN3A3       | -0.740644 |
| SLC38A2      | -0.740595 |
| SIGIRR       | -0.738462 |
| PLAG1        | -0.736977 |
| FBXL19       | -0.736187 |
| ARRB1        | -0.73511  |
| C16orf13     | -0.73465  |
| TRPT1        | -0.734381 |
| FAM117B      | -0.733741 |
| MR1          | -0.732634 |
| SPRY4        | -0.731986 |
| CXXC5        | -0.731712 |
| CDC42BPG     | -0.731617 |
| HEXIM2       | -0.731204 |
| ZNF517       | -0.730974 |
| BTBD2        | -0.730429 |
| KNDC1        | -0.72885  |
| MGAT3        | -0.727146 |
| PROSAPIP1    | -0.726195 |
| FAM84B       | -0.725689 |
| SCAND3       | -0.725407 |
| IFT27        | -0.725113 |
| HMG20B       | -0.723836 |
| OBSCN        | -0.7229   |
| CDC42EP4     | -0.722887 |
| PLAC2        | -0.72262  |
| ACOX2        | -0.720477 |
| PEX6         | -0.719748 |
| PLXNB1       | -0.717891 |
| MAGEB2       | -0.717605 |
| FAM214B      | -0.716949 |
| GSN          | -0.716749 |
| ID2          | -0.716599 |
| MIR3605,PHC2 | -0.716219 |
| ABHD14B      | -0.716122 |
| IL6          | -0.715958 |
| NREP         | -0.715736 |
| MSI1         | -0.715109 |
| TNFRSF1A     | -0.714403 |

|             |           |
|-------------|-----------|
| ITFG3       | -0.714325 |
| TSNARE1     | -0.713037 |
| RSG1        | -0.712801 |
| ALKBH7      | -0.711954 |
| TNS3        | -0.71122  |
| TOB1        | -0.709943 |
| TNFAIP3     | -0.709142 |
| CCDC146,DTX | -0.707908 |
| ACADS       | -0.707865 |
| EXD3        | -0.707623 |
| TNIK        | -0.707202 |
| ID1         | -0.705435 |
| SH3BP2      | -0.702104 |
| RAB40B      | -0.701717 |
| BNIP3       | -0.701536 |
| TTC30A      | -0.70057  |
| MXI1        | -0.700391 |
| HLA-E       | -0.700191 |
| IDNK        | -0.699471 |
| LOC646778   | -0.699383 |
| TOM1        | -0.698657 |
| SYNPO       | -0.698638 |
| PHLDB3      | -0.698473 |
| ARHGEF16    | -0.697619 |
| PCMTD1      | -0.696421 |
| TLR3        | -0.696199 |
| GLTSCR2     | -0.694237 |
| MZF1        | -0.694168 |
| PSORS1C3    | -0.693903 |
| MNT         | -0.692792 |
| GPSM3,NOTC  | -0.690576 |
| PTK2B       | -0.68934  |
| BBS1        | -0.688985 |
| SCAND1      | -0.688335 |
| PSMB9       | -0.687867 |
| TINAGL1     | -0.687836 |
| PSME1       | -0.686933 |
| ACTN3       | -0.686669 |
| BTN3A1      | -0.686099 |
| ST3GAL5     | -0.685851 |

|              |           |
|--------------|-----------|
| LPAR1        | -0.685495 |
| TMEM123      | -0.685413 |
| ANKRD5       | -0.68508  |
| PPM1H        | -0.684612 |
| AMN1         | -0.682868 |
| CTSA         | -0.682646 |
| SH3BGRL      | -0.682218 |
| RILPL2       | -0.681591 |
| TSPAN15      | -0.681285 |
| RAI2         | -0.681221 |
| BTN3A2       | -0.680156 |
| LOC550643    | -0.679406 |
| FUK          | -0.677665 |
| MPST         | -0.676503 |
| TIE1         | -0.676217 |
| ZNF608       | -0.675311 |
| NBR2         | -0.67456  |
| ANKRD34B     | -0.673774 |
| ICK          | -0.673629 |
| ICA1         | -0.673607 |
| PPP1R16A     | -0.672489 |
| GDPGP1,TTL   | -0.67248  |
| HOXB3        | -0.67232  |
| CTDSP2       | -0.67202  |
| ZNF395       | -0.671653 |
| SLC52A3      | -0.671515 |
| FAM214A      | -0.671317 |
| C17orf59     | -0.670802 |
| MAGED2       | -0.67072  |
| HOXB7,HOXB8  | -0.670249 |
| SORCS2       | -0.67023  |
| IQSEC2       | -0.670185 |
| ZNF821       | -0.66928  |
| RSPH3        | -0.664963 |
| COL4A4       | -0.664768 |
| VAT1         | -0.664123 |
| TMEM67       | -0.662825 |
| METRNL       | -0.661908 |
| DNAJC4,NUDT1 | -0.661556 |
| SYTL2        | -0.661388 |

|             |           |
|-------------|-----------|
| SPINT2      | -0.66065  |
| CHMP1B      | -0.660545 |
| C7orf60     | -0.660523 |
| LURAP1L     | -0.66039  |
| HDAC5       | -0.660339 |
| PCMTD2      | -0.659349 |
| MNX1        | -0.658848 |
| UNC93B1     | -0.658794 |
| ZBTB12      | -0.658282 |
| HKDC1       | -0.657209 |
| TMEM231     | -0.656777 |
| ARHGEF25,SL | -0.656706 |
| FBXL15      | -0.654394 |
| CCDC15,SLC3 | -0.654279 |
| SNRPN,SNURI | -0.653787 |
| PSTPIP2     | -0.652924 |
| NCOA7       | -0.65153  |
| WNT7B       | -0.650936 |
| PRAME       | -0.650217 |
| GRINA       | -0.650019 |
| PLCH1       | -0.649774 |
| ADAP1       | -0.648406 |
| LRRC27      | -0.648099 |
| ACSS1       | -0.648052 |
| SCN2A       | -0.647812 |
| LRCH2       | -0.647519 |
| UBE2H       | -0.647474 |
| MRAS        | -0.647424 |
| PTMS        | -0.647125 |
| C11orf9     | -0.646997 |
| THBD        | -0.646732 |
| SLC7A11     | -0.645993 |
| CHST2       | -0.6458   |
| CXCL1       | -0.645556 |
| SH3BP1      | -0.645326 |
| FAM100B     | -0.645008 |
| TUBA1A      | -0.644089 |
| SURF1       | -0.643995 |
| ABHD11      | -0.643084 |
| FGFRL1      | -0.642467 |

|             |           |
|-------------|-----------|
| KLHDC8B     | -0.641821 |
| MARCH2      | -0.641557 |
| PIGZ        | -0.641457 |
| PLK1S1      | -0.641452 |
| ARSD        | -0.640726 |
| GPX4        | -0.640602 |
| CUTA        | -0.640411 |
| SMIM3       | -0.639793 |
| MGST2       | -0.639099 |
| HAP1        | -0.638951 |
| ZNF350      | -0.638435 |
| MEGF6       | -0.636042 |
| KLHL13      | -0.636018 |
| KRCC1       | -0.633928 |
| PPAP2B      | -0.633788 |
| LMBRD1      | -0.63343  |
| STAT2       | -0.633335 |
| NAPRT1      | -0.633164 |
| LTBR        | -0.632474 |
| TRAPPC5     | -0.631237 |
| BCL2L11     | -0.631216 |
| ZFP2,ZNF454 | -0.630781 |
| OSBPL5      | -0.630289 |
| IFIH1       | -0.629376 |
| EBF4        | -0.629007 |
| PPP1R35     | -0.628808 |
| BCAN        | -0.628577 |
| BAIAP2-AS1  | -0.628513 |
| EPHA10      | -0.625727 |
| EPOR,RGL3   | -0.625683 |
| SEMA4G      | -0.625676 |
| CAV1        | -0.624934 |
| C1QL1       | -0.624351 |
| CMTM8       | -0.62373  |
| TRPC6       | -0.62355  |
| FBLN2       | -0.622668 |
| SLC35E2B    | -0.622432 |
| NFIL3       | -0.622257 |
| ZNF385A     | -0.622113 |
| ATP6V0E2    | -0.62211  |

|             |           |
|-------------|-----------|
| LRRN2       | -0.621624 |
| RASSF9      | -0.621325 |
| GPR108      | -0.620823 |
| TCTN1       | -0.620567 |
| ZBTB42      | -0.619802 |
| NFKBIA      | -0.619352 |
| SYNGR3      | -0.619133 |
| CUEDC2      | -0.618829 |
| FAM213A     | -0.617862 |
| OGFR        | -0.617648 |
| SORBS1      | -0.616902 |
| KCTD1       | -0.616734 |
| ZNF444      | -0.616237 |
| HAPLN4,TM6S | -0.614764 |
| FGF11,TMEM1 | -0.613189 |
| ATF6B       | -0.612973 |
| ZSCAN30     | -0.612874 |
| KLHDC2      | -0.612453 |
| FDFT1       | -0.611789 |
| OAF         | -0.611365 |
| APOL6       | -0.610231 |
| CDK19       | -0.609829 |
| SLC4A11     | -0.608509 |
| GM2A        | -0.608499 |
| FAM3C       | -0.607733 |
| MAFF        | -0.605678 |
| CDC25B      | -0.604535 |
| SERINC5     | -0.60426  |
| PRKCDBP     | -0.60411  |
| CARD8       | -0.603502 |
| UGCG        | -0.603462 |
| NUCB1       | -0.603253 |
| C5orf55     | -0.603184 |
| SLCO2B1     | -0.602632 |
| KIAA1217    | -0.60182  |
| GTF2IRD2B   | -0.600297 |
| RNF44       | -0.600246 |
| BARX1       | -0.599954 |
| TPD52L1     | -0.59977  |
| IFT43       | -0.599347 |

|          |           |
|----------|-----------|
| SLC25A42 | -0.598874 |
| TOM1L2   | -0.59877  |
| SPSB3    | -0.597735 |
| SLC9A7   | -0.597535 |
| ZNF628   | -0.597107 |
| CST3     | -0.597053 |
| JMY      | -0.596546 |
| UGDH-AS1 | -0.596305 |
| DTX4     | -0.595447 |
| SAMD12   | -0.595374 |
| SH2D3A   | -0.594968 |
| TP53INP2 | -0.594591 |
| SKAP2    | -0.593441 |
| YIPF3    | -0.592039 |
| FLOT2    | -0.588785 |
| ITM2B    | -0.588686 |
| GLB1L    | -0.588466 |
| GFPT2    | -0.588118 |
| MAF1     | -0.587318 |
| IFI6     | -0.585635 |
| PPAPDC2  | -0.585014 |
| VWA1     | -0.58473  |
| VEGFB    | -0.584215 |
| FAM86C2P | -0.583781 |
| KIAA0040 | -0.583087 |
| VAV1     | -0.582606 |
| LRP10    | -0.582508 |
| HOXD9    | -0.582394 |
| MGST3    | -0.582163 |
| EGFL7    | -0.58169  |
| PLEKHA1  | -0.581314 |
| FAM127B  | -0.580797 |
| PIK3R1   | -0.57994  |
| ZFP14    | -0.579409 |
| CCDC149  | -0.578872 |
| TANC1    | -0.578798 |
| TMEM74B  | -0.578295 |
| FLJ20464 | -0.577668 |
| PRODH    | -0.576748 |
| HSD17B1  | -0.576506 |



|            |           |
|------------|-----------|
| WDTC1      | -0.575841 |
| IRF1       | -0.575647 |
| TCF7L2     | -0.57564  |
| C14orf79   | -0.575533 |
| PPCS       | -0.575369 |
| ASAP3      | -0.573794 |
| ZNF747     | -0.573608 |
| SBK1       | -0.57201  |
| TMEM187    | -0.571699 |
| IP6K2      | -0.571483 |
| DIRAS1     | -0.57134  |
| BASP1      | -0.571141 |
| METTL23    | -0.571133 |
| SEMA4B     | -0.57101  |
| ETHE1      | -0.57034  |
| SPIRE2     | -0.570175 |
| MRC2       | -0.569785 |
| TRERF1     | -0.569561 |
| VWTR1      | -0.569121 |
| PML        | -0.56856  |
| CD40       | -0.56753  |
| TMCC3      | -0.567213 |
| PPP4R4     | -0.564866 |
| C1orf106   | -0.56336  |
| HTRA1      | -0.562724 |
| ANKRD29    | -0.560721 |
| LBH        | -0.560651 |
| STMN3      | -0.560303 |
| KCNJ16     | -0.559156 |
| ST6GALNAC4 | -0.559004 |
| PLEKHA5    | -0.558952 |
| ASB13      | -0.558639 |
| CYFIP2     | -0.558603 |
| NAGLU      | -0.557492 |
| PRAF2      | -0.556915 |
| RTN2       | -0.555295 |
| SPINT1     | -0.554777 |
| PGLS       | -0.554123 |
| HIST1H2BK  | -0.554025 |
| GABARAP    | -0.553223 |

|              |           |
|--------------|-----------|
| CTDSP1       | -0.552734 |
| CBS          | -0.552428 |
| HOXD8        | -0.551392 |
| CCDC24       | -0.551361 |
| MTUS1        | -0.551336 |
| MIR21        | -0.550908 |
| MMP15        | -0.548639 |
| CACFD1       | -0.54716  |
| MAT2B        | -0.545635 |
| TMEM59       | -0.545473 |
| NEDD4L       | -0.543991 |
| CSPG5        | -0.541085 |
| GRTP1        | -0.540992 |
| TRIM21       | -0.540988 |
| TMEM181      | -0.540942 |
| SQSTM1       | -0.538988 |
| FDXR         | -0.538371 |
| C1QTNF6      | -0.538229 |
| MEIS1        | -0.537225 |
| HOXA13       | -0.537058 |
| MIR3614,TRIM | -0.537023 |
| FAM127A      | -0.536781 |
| RGL2         | -0.536499 |
| RRAGA        | -0.536463 |
| IL18R1       | -0.535794 |
| HOXB13       | -0.535011 |
| BBS2         | -0.534959 |
| CACNB3       | -0.534613 |
| EFNA3        | -0.533934 |
| IKBKE        | -0.533829 |
| AIG1         | -0.533788 |
| POLR3GL      | -0.533086 |
| CCDC92       | -0.531789 |
| DHX40        | -0.531543 |
| LOC728431    | -0.531118 |
| DNAL4        | -0.530953 |
| GARNL3       | -0.530008 |
| NCOA1        | -0.529525 |
| SLC35F3      | -0.528776 |
| FGF18        | -0.527532 |

|                |           |
|----------------|-----------|
| TMEM8B         | -0.527086 |
| FLI1           | -0.525389 |
| GSTK1          | -0.525134 |
| SNORA47,ZBE    | -0.524641 |
| EDN1           | -0.524375 |
| MYLIP          | -0.523975 |
| TUSC1          | -0.523046 |
| CNIH3          | -0.522269 |
| HPS1,MIR1287   | -0.520763 |
| MAPK3          | -0.520654 |
| BCAS1          | -0.519761 |
| MAP3K1         | -0.519193 |
| LOC93622       | -0.518989 |
| LOC388692      | -0.518385 |
| PTPRS          | -0.518368 |
| ZER1           | -0.518219 |
| CAPN5          | -0.516835 |
| DAZAP2         | -0.516755 |
| C10orf54       | -0.516581 |
| NFKBIZ,NXPE3   | -0.516466 |
| FIGF,PIR,PIR-I | -0.515646 |
| SLC22A23       | -0.515258 |
| RNF5           | -0.514715 |
| PNP            | -0.514469 |
| RAB36          | -0.513972 |
| MPI            | -0.51338  |
| RPP25L         | -0.513253 |
| DRAM1          | -0.51253  |
| TRPS1          | -0.512529 |
| SQRDL          | -0.511066 |
| TXNIP          | -0.509566 |
| GJA3           | -0.509323 |
| FTL            | -0.509309 |
| MTSS1L         | -0.509244 |
| SATB1          | -0.507656 |
| GLRB           | -0.506204 |
| C17orf67       | -0.506074 |
| LAPTM4B        | -0.505517 |
| C1orf226,NOS1  | -0.504483 |
| MYADM          | -0.503936 |

|          |           |
|----------|-----------|
| ZNF362   | -0.502143 |
| RBL2     | -0.501982 |
| PTGR1    | -0.501612 |
| FAM109A  | -0.501427 |
| HIP1R    | -0.500907 |
| UAP1L1   | -0.50088  |
| CHMP2A   | -0.500143 |
| EPB41L1  | -0.499517 |
| HS1BP3   | -0.499423 |
| CAMK2N1  | -0.499417 |
| H6PD     | -0.49899  |
| RABEP2   | -0.498792 |
| C9orf3   | -0.497855 |
| FAM108A1 | -0.497709 |
| APBB1    | -0.497096 |
| LSS      | -0.497053 |
| FOXE1    | -0.496919 |
| SAP30L   | -0.495825 |
| RTN4R    | -0.494133 |
| STXBP2   | -0.493862 |
| ECH1     | -0.493856 |
| TFDP2    | -0.493699 |
| FHL3     | -0.492766 |
| PSMB10   | -0.492752 |
| MAT2A    | -0.492659 |
| LZTFL1   | -0.492551 |
| OGDHL    | -0.49194  |
| CCDC120  | -0.491579 |
| TSC22D4  | -0.491563 |
| ARHGAP39 | -0.489619 |
| NADSYN1  | -0.488577 |
| PP7080   | -0.487728 |
| ETV5     | -0.48765  |
| SLC30A1  | -0.487617 |
| IRF2BP1  | -0.486679 |
| H2AFJ    | -0.486332 |
| PIH1D1   | -0.486234 |
| TPBG     | -0.486067 |
| NNT      | -0.485571 |
| NFATC1   | -0.484473 |

|              |           |
|--------------|-----------|
| SPECC1       | -0.484407 |
| GOLPH3L      | -0.484189 |
| CRHR1,CRHR   | -0.482582 |
| EIF4B        | -0.482002 |
| CYP2U1       | -0.481529 |
| AKNA         | -0.48146  |
| SPRY2        | -0.481118 |
| CYHR1        | -0.481024 |
| LINC00623    | -0.480595 |
| XKR6         | -0.480332 |
| CLIP2        | -0.48009  |
| ACAD10,ALDH  | -0.479643 |
| NGFRAP1      | -0.479418 |
| ZBED2        | -0.478739 |
| SHARPIN      | -0.478404 |
| TMEM219      | -0.477641 |
| MIR1469,NR2F | -0.477175 |
| SLC25A29     | -0.476439 |
| C4orf3       | -0.47632  |
| LTA4H        | -0.47561  |
| WDR60        | -0.474953 |
| FBXW9        | -0.474817 |
| SIPA1        | -0.473136 |
| HERC6        | -0.472853 |
| TEAD2        | -0.471936 |
| TBC1D22A     | -0.470838 |
| OAZ2         | -0.470655 |
| IMP3         | -0.470602 |
| RABAC1       | -0.46961  |
| RNF150       | -0.469397 |
| QPCTL        | -0.469209 |
| HDAC11       | -0.468488 |
| KCTD18       | -0.467561 |
| IGSF8        | -0.466852 |
| RASGEF1A     | -0.465855 |
| MAPRE3       | -0.465734 |
| DAPK1        | -0.464416 |
| WTAP         | -0.464332 |
| ZNF486       | -0.463825 |
| HSD17B8      | -0.463423 |

|             |           |
|-------------|-----------|
| DENND3      | -0.462206 |
| NR1H2       | -0.461741 |
| C2orf29     | -0.461698 |
| ARHGEF17    | -0.461391 |
| USP30       | -0.461321 |
| HLA-F       | -0.461111 |
| SELO        | -0.459917 |
| FAM174B     | -0.458846 |
| GMCL1       | -0.458604 |
| CASC4       | -0.457088 |
| SLC1A3      | -0.455845 |
| FAM63B      | -0.455468 |
| SYNGR2      | -0.455011 |
| MAPK8IP3    | -0.454684 |
| HMGCL       | -0.454111 |
| ZSCAN18     | -0.451928 |
| SPPL3       | -0.45152  |
| ACER3       | -0.450995 |
| ARHGAP12    | -0.450703 |
| WDR54       | -0.450517 |
| ZFAND6      | -0.449894 |
| SERPINA1    | -0.449552 |
| GALNS       | -0.44903  |
| AHCYL1      | -0.448672 |
| VCAN        | -0.446289 |
| TSPYL4      | -0.446044 |
| PHPT1       | -0.446033 |
| CUEDC1      | -0.445252 |
| MRPL10,SCRN | -0.445059 |
| DECR1       | -0.444302 |
| FAM171A2    | -0.443918 |
| SUDS3       | -0.443459 |
| LGALS3      | -0.443435 |
| MAP4K3      | -0.443325 |
| H1FX        | -0.442289 |
| SLC24A6     | -0.442206 |
| LONRF2      | -0.442101 |
| OS9         | -0.441961 |
| PON2        | -0.440254 |
| RASSF7      | -0.439593 |

|             |           |
|-------------|-----------|
| COL5A2      | -0.439538 |
| MARCKSL1    | -0.439452 |
| LGALS3BP    | -0.43942  |
| PARP14      | -0.437388 |
| ANXA1       | -0.436058 |
| DCAF5       | -0.435881 |
| PRDX5       | -0.435667 |
| C1orf233    | -0.435335 |
| RAB11B      | -0.434629 |
| GMPR2       | -0.434469 |
| FBRS        | -0.434377 |
| LIMCH1      | -0.433793 |
| GNE         | -0.432537 |
| SYT17       | -0.431374 |
| BIN1        | -0.43044  |
| IL18        | -0.430302 |
| SPNS1       | -0.429797 |
| CPNE1,RBM12 | -0.429768 |
| SLC25A1     | -0.428478 |
| FAM210B     | -0.426845 |
| CCDC6       | -0.424748 |
| IRAK2,VHL   | -0.424521 |
| CAMK2D      | -0.423883 |
| COA5        | -0.423838 |
| CLCN7       | -0.423298 |
| FAM160B1    | -0.423168 |
| KAZN        | -0.423094 |
| OTUD5       | -0.422473 |
| MINK1       | -0.422438 |
| SLC50A1     | -0.421891 |
| ZNF516      | -0.420502 |
| STX4        | -0.420386 |
| LGR4        | -0.420092 |
| VPS51       | -0.419532 |
| RB1CC1      | -0.418453 |
| PNPLA6      | -0.418382 |
| SPG21       | -0.417939 |
| MOV10       | -0.417704 |
| PDP1        | -0.41608  |
| TPRG1L      | -0.414946 |

|               |           |
|---------------|-----------|
| WDR59         | -0.414927 |
| CD302,LY75,L\ | -0.414923 |
| TMUB2         | -0.414212 |
| BTBD1         | -0.41287  |
| ARL6IP5       | -0.410318 |
| ADAM10        | -0.409461 |
| NRIP1         | -0.409045 |
| PCDHB2        | -0.406923 |
| BST2          | -0.406639 |
| HSPB1         | -0.406573 |
| CORO1B        | -0.40617  |
| H3F3AP4       | -0.405464 |
| SLC46A1       | -0.403842 |
| NBR1          | -0.403483 |
| TPRA1         | -0.40291  |
| RNF130        | -0.402546 |
| ARAP1         | -0.402317 |
| KLF13         | -0.400674 |
| PPP1R3B       | -0.400576 |
| GLIS3         | -0.400427 |
| C19orf43      | -0.400076 |
| SREBF2        | -0.398882 |
| ZBTB1         | -0.398709 |
| SALL1         | -0.395961 |
| CD81          | -0.393792 |
| GCC2          | -0.392786 |
| QARS          | -0.389277 |
| PPP1R9B       | -0.385938 |
| MIR639,TECR   | -0.385579 |
| PRKD2         | -0.384519 |
| ZNF217        | -0.382864 |
| TNFRSF21      | -0.381629 |
| APOL2         | -0.380835 |
| COASY         | -0.37826  |
| MAGED1        | -0.376022 |
| MLLT6         | -0.375723 |
| IER3          | -0.373371 |
| KCNK1         | -0.370162 |

(J) Genes significantly upregulated by sh-TLE2



| Gene list            | log2-fold-change |
|----------------------|------------------|
| FGF1                 | 5.85538          |
| NAV3                 | 4.81581          |
| SERPINB7             | 4.43693          |
| MARCH4               | 4.05713          |
| GPR111               | 3.46902          |
| CGB8                 | 3.45376          |
| KCNH1                | 3.29653          |
| SPHK1                | 3.29165          |
| SERPINE1             | 3.27218          |
| LOC100507420         | 3.15456          |
| MYH16                | 3.1516           |
| ESM1                 | 3.13118          |
| STRA6                | 3.12677          |
| HCG22                | 3.0774           |
| TNC                  | 2.76345          |
| PDCD1LG2             | 2.687            |
| EGOT                 | 2.66607          |
| CGB5                 | 2.58213          |
| LRRC38               | 2.55963          |
| SEMA7A               | 2.53728          |
| CCBE1                | 2.52144          |
| GLIPR1               | 2.51643          |
| LOC340113            | 2.50859          |
| GABBR2               | 2.46632          |
| GDF6                 | 2.4452           |
| TRIML2               | 2.35465          |
| WDR69                | 2.34768          |
| ANXA8L1,LOC100507420 | 2.26571          |
| AOX1                 | 2.26053          |
| LMCD1                | 2.25629          |
| PTHLH                | 2.20676          |
| ADAMTS1              | 2.20269          |
| P4HA3                | 2.18578          |
| SCEL                 | 2.14841          |
| LAMC2                | 2.10629          |
| NR6A1                | 2.09346          |
| ADRA1B               | 2.08935          |
| NEXN                 | 2.07669          |
| CREB5,LOC401307      | 2.06309          |

|              |         |
|--------------|---------|
| FGF5         | 2.0116  |
| ZNF185       | 1.98276 |
| PDPN         | 1.97061 |
| C1QTNF2      | 1.96628 |
| CD274        | 1.93586 |
| MGC4294      | 1.89304 |
| MYO7B        | 1.87794 |
| C3orf52      | 1.8611  |
| FAM83A       | 1.83623 |
| FRMD6        | 1.81071 |
| PEAR1        | 1.79789 |
| GALNTL4      | 1.79752 |
| ALPL         | 1.75163 |
| SPOCK1       | 1.74884 |
| TGFBI        | 1.73675 |
| MB21D2       | 1.73613 |
| XDH          | 1.73471 |
| BTBD11       | 1.71138 |
| BCYRN1       | 1.65641 |
| LRRN4        | 1.62909 |
| THSD4        | 1.60289 |
| CYP26B1      | 1.59401 |
| HHIP         | 1.59294 |
| CGB7,NTF4    | 1.57167 |
| LOC100506377 | 1.55222 |
| TLL2         | 1.5494  |
| PLXNA2       | 1.52663 |
| CYP4F11      | 1.5182  |
| FERMT1       | 1.51378 |
| FAM101B      | 1.50888 |
| COL4A1       | 1.49894 |
| MSC          | 1.49495 |
| LAMA3        | 1.49436 |
| E2F7         | 1.46547 |
| ADAMTS5      | 1.46074 |
| ZNF542       | 1.45591 |
| NKX6-1       | 1.45485 |
| DACT1        | 1.44638 |
| INHBA        | 1.4351  |
| LHFP         | 1.42102 |

|               |         |
|---------------|---------|
| CCDC80        | 1.41574 |
| FSTL3         | 1.40951 |
| CYP1A1        | 1.4041  |
| CRYAB         | 1.39259 |
| DOCK2         | 1.39222 |
| GAL           | 1.38893 |
| KBTBD8        | 1.3878  |
| GPR19         | 1.38257 |
| RFTN1         | 1.36023 |
| GALNT6        | 1.35648 |
| ANXA8L2       | 1.3555  |
| SNAI2         | 1.35028 |
| THBS1         | 1.34475 |
| CYR61         | 1.33852 |
| RBP1          | 1.32905 |
| PHLDB2,PLCX1  | 1.32178 |
| HBEGF         | 1.31708 |
| S100A2        | 1.31051 |
| KLF7          | 1.30791 |
| ANPEP         | 1.29779 |
| CLSPN         | 1.29387 |
| NAV2          | 1.29239 |
| CLCN5         | 1.29027 |
| MICAL2        | 1.28507 |
| OXCT1         | 1.26805 |
| PSMD2         | 1.2657  |
| C9orf47,S1PR3 | 1.2562  |
| LOC401164     | 1.25456 |
| TIMP3         | 1.24928 |
| XYLT1         | 1.24741 |
| NRIP3         | 1.23672 |
| LRP4          | 1.23537 |
| LIMA1         | 1.22498 |
| COL1A1        | 1.20802 |
| SACS          | 1.20698 |
| B4GALNT1      | 1.20562 |
| SGK1          | 1.20427 |
| PTPRF         | 1.20023 |
| PIEZO1        | 1.19691 |
| TNS1          | 1.1965  |

|              |         |
|--------------|---------|
| HIC1         | 1.1912  |
| GPR126       | 1.18338 |
| CDK6         | 1.17749 |
| WDR4         | 1.16363 |
| MYH9         | 1.16095 |
| STRIP2       | 1.15777 |
| RN7SL2       | 1.1571  |
| PDGFB        | 1.15474 |
| FOSL1        | 1.1526  |
| ADAM19       | 1.14926 |
| TNFRSF12A    | 1.14734 |
| UCN2         | 1.13891 |
| ENTPD4,LOXL  | 1.13659 |
| TRPM2        | 1.12797 |
| MKI67        | 1.12454 |
| CENPI        | 1.12421 |
| UBASH3B      | 1.12088 |
| JPH2         | 1.12007 |
| LOC100506271 | 1.11732 |
| ITGB1        | 1.11339 |
| EFNB2        | 1.11217 |
| APCDD1L-AS1  | 1.11161 |
| PLAU         | 1.10937 |
| CAPN2        | 1.10882 |
| OXTR,RAD18   | 1.10593 |
| DIAPH3       | 1.10455 |
| TPM4         | 1.10276 |
| SHANK3       | 1.10238 |
| MAP1B        | 1.09921 |
| PMEPA1       | 1.09899 |
| ANXA3        | 1.09724 |
| SKA1         | 1.09414 |
| CTPS1        | 1.08785 |
| LOC81691     | 1.07984 |
| ANLN         | 1.07873 |
| APBA1        | 1.07714 |
| CKAP2L       | 1.07244 |
| RPE65        | 1.07212 |
| ZNF729       | 1.07094 |
| MME          | 1.06854 |

|          |          |
|----------|----------|
| CORO2B   | 1.06142  |
| APOBEC3B | 1.06123  |
| CTGF     | 1.06096  |
| COL5A1   | 1.0566   |
| FANCI    | 1.0541   |
| RASSF1   | 1.05338  |
| TCF19    | 1.05326  |
| NLRP3    | 1.05195  |
| POLR3G   | 1.04723  |
| KIAA1524 | 1.04406  |
| EDNRA    | 1.04352  |
| TTF2     | 1.04169  |
| ABLIM3   | 1.04062  |
| DOCK10   | 1.03959  |
| PSMC3IP  | 1.03779  |
| CENPK    | 1.03708  |
| TRIP13   | 1.03477  |
| ACE2     | 1.02982  |
| ARHGAP31 | 1.02952  |
| C3orf67  | 1.02904  |
| SEMA6A   | 1.02557  |
| OSBPL6   | 1.02531  |
| MYOM3    | 1.02404  |
| LTBP2    | 1.02238  |
| WDR62    | 1.0154   |
| MIR3939  | 1.01345  |
| NTN1     | 1.01197  |
| MYBL2    | 1.0097   |
| NUP155   | 1.00743  |
| SFN      | 1.00702  |
| KNTC1    | 1.0064   |
| HSP90AA1 | 1.00571  |
| MYBL1    | 1.00432  |
| POLQ     | 1.00402  |
| CDH2     | 1.00222  |
| UCA1     | 0.999642 |
| FANCA    | 0.999356 |
| UPP1     | 0.997331 |
| DSEL     | 0.996726 |
| SHCBP1   | 0.993496 |

|               |          |
|---------------|----------|
| CHST3         | 0.990792 |
| MCM10         | 0.99048  |
| FAM57B,LOC1   | 0.990133 |
| WDR67         | 0.990024 |
| MICA          | 0.989961 |
| PLK4          | 0.984664 |
| ENPP1         | 0.984484 |
| PTPRR         | 0.979654 |
| CCDC36        | 0.979547 |
| KIT           | 0.978738 |
| CYP27B1       | 0.977846 |
| BAMBI         | 0.975673 |
| PTPRB         | 0.974326 |
| FAM196B       | 0.973979 |
| MARCH3        | 0.973912 |
| TLL1          | 0.973133 |
| FKBP5,LOC284  | 0.971602 |
| KIAA1715      | 0.971093 |
| GEM           | 0.970758 |
| NFASC         | 0.969395 |
| HOMER2        | 0.968887 |
| C7orf53,IFRD1 | 0.968783 |
| ESPL1         | 0.964985 |
| PHF17         | 0.964404 |
| MT2A          | 0.964248 |
| PIGW          | 0.96409  |
| MFAP5         | 0.962806 |
| BARD1         | 0.962417 |
| CASC5         | 0.95966  |
| SLC6A17       | 0.957549 |
| FAM72D        | 0.956304 |
| ESCO2         | 0.955627 |
| ZWINT         | 0.953073 |
| KDR           | 0.952116 |
| FLNB          | 0.951747 |
| ETS2          | 0.950755 |
| MID1          | 0.949706 |
| TUBB2A        | 0.949    |
| YOD1          | 0.946843 |
| GSG2          | 0.946016 |

|               |          |
|---------------|----------|
| NCAPH         | 0.944468 |
| LOC100506394  | 0.94283  |
| UTP20         | 0.942258 |
| S100A3        | 0.940206 |
| CDH18         | 0.938542 |
| ADCY1         | 0.937236 |
| CDCA5         | 0.936935 |
| NCS1          | 0.93396  |
| ERCC6L        | 0.933415 |
| C6orf183,CEP5 | 0.930806 |
| SBDSP1        | 0.929782 |
| FANCB         | 0.929604 |
| ARHGAP11A     | 0.929464 |
| ZNF107        | 0.929164 |
| RGS20         | 0.928804 |
| SNHG1,SNOR1   | 0.926503 |
| MTBP          | 0.924264 |
| KATNAL1       | 0.923903 |
| NUP188        | 0.923573 |
| HSF2BP        | 0.922374 |
| SCML2         | 0.922112 |
| KIF18B        | 0.922081 |
| CENPW         | 0.921166 |
| ZNF367        | 0.920246 |
| MAMLD1        | 0.919039 |
| HRASLS        | 0.916636 |
| GADD45B       | 0.915988 |
| PRKAB2        | 0.915968 |
| EXO1          | 0.915732 |
| CDCA4         | 0.91335  |
| CDC25A        | 0.911612 |
| CHSY3         | 0.909431 |
| HIVEP3        | 0.908211 |
| UBE2T         | 0.90673  |
| CENPO         | 0.900265 |
| UNKL          | 0.89948  |
| PARM1         | 0.898949 |
| E2F8          | 0.898884 |
| CCNA2         | 0.898096 |
| CCNF          | 0.897716 |

|               |          |
|---------------|----------|
| C11orf82      | 0.897143 |
| NCAPG         | 0.89641  |
| BRCA2         | 0.896257 |
| EFR3B         | 0.896245 |
| PRKDC         | 0.895997 |
| PDE4B         | 0.895727 |
| PRPS1         | 0.895221 |
| HS3ST3A1      | 0.894298 |
| DCLRE1B       | 0.894057 |
| ALMS1         | 0.892918 |
| TUBA1B        | 0.891826 |
| ACTN4         | 0.888873 |
| PODXL         | 0.88884  |
| TANC2         | 0.888753 |
| SH3RF3        | 0.886899 |
| IQGAP3        | 0.882309 |
| CAD           | 0.882205 |
| ZNF850        | 0.881487 |
| STIL          | 0.879467 |
| ARSB          | 0.879358 |
| DDX21         | 0.878872 |
| CAMK4         | 0.877838 |
| BRIP1         | 0.876974 |
| TICRR         | 0.876041 |
| TUFT1         | 0.875011 |
| TBX20         | 0.874828 |
| NOL6          | 0.874773 |
| ANKRD1        | 0.874769 |
| SPDL1         | 0.874076 |
| MYO19         | 0.873636 |
| CENPN         | 0.871793 |
| TRAF1         | 0.870157 |
| SLC7A5        | 0.869414 |
| CDH3          | 0.869117 |
| ARNTL2,C12orf | 0.86884  |
| ORC6          | 0.863777 |
| RANGAP1       | 0.862994 |
| OLR1          | 0.862671 |
| SLC1A4        | 0.859127 |
| ZNF365        | 0.858085 |



|              |          |
|--------------|----------|
| GTF2H2C      | 0.856421 |
| PLCB4        | 0.856419 |
| DLX1         | 0.853306 |
| JAG1         | 0.851907 |
| CYCS         | 0.850772 |
| AURKB        | 0.850651 |
| RTKN2        | 0.849573 |
| COL7A1,MIR71 | 0.848177 |
| HAUS2        | 0.847924 |
| FAT1         | 0.847203 |
| SAMD4A       | 0.846724 |
| BLM          | 0.846495 |
| CCNE2        | 0.84614  |
| NID1         | 0.846128 |
| ALS2CL       | 0.8446   |
| DKK3         | 0.844482 |
| KLF10        | 0.844197 |
| CD83         | 0.844191 |
| NCAPG2       | 0.843806 |
| SPATA5       | 0.841554 |
| COL4A2       | 0.841073 |
| RACGAP1      | 0.84015  |
| IFRD2        | 0.838424 |
| PPCDC        | 0.838344 |
| RAD51AP1     | 0.836746 |
| MOXD1        | 0.836116 |
| NEIL3        | 0.835939 |
| BUB1B,PAK6   | 0.835583 |
| ARHGAP33     | 0.834595 |
| CDCA2        | 0.834399 |
| MCM8         | 0.834265 |
| POLE         | 0.834131 |
| CDCA8        | 0.833888 |
| RECQL4       | 0.833442 |
| MEX3B        | 0.833179 |
| TMEM74       | 0.831993 |
| SKA3         | 0.831587 |
| GFOD1        | 0.831551 |
| CSTF2        | 0.83153  |
| NXPH2        | 0.831173 |

|             |          |
|-------------|----------|
| ARHGAP19,AR | 0.830892 |
| KPNA2       | 0.830533 |
| RIBC2       | 0.82825  |
| HS3ST3B1    | 0.827354 |
| STAC        | 0.827297 |
| TGFB2       | 0.826847 |
| C17orf53    | 0.824918 |
| RBL1        | 0.824105 |
| ATAD2       | 0.824073 |
| PRC1        | 0.822782 |
| MND1        | 0.819511 |
| SMG9        | 0.818472 |
| PPIF        | 0.818347 |
| FXYD5       | 0.817788 |
| MELK        | 0.816488 |
| MICALCL     | 0.816043 |
| ZNF643      | 0.815458 |
| DGCR8,MIR13 | 0.81473  |
| NFATC2IP    | 0.814525 |
| ELFN2       | 0.813414 |
| CDC45       | 0.812519 |
| SHANK2      | 0.812433 |
| TPM1        | 0.811652 |
| CLTCL1      | 0.810645 |
| C12orf75    | 0.810498 |
| CALD1       | 0.810384 |
| HIPK2       | 0.809444 |
| STEAP3      | 0.808463 |
| GADD45A     | 0.806702 |
| CNTNAP1     | 0.806375 |
| LINC00116   | 0.805977 |
| LOC650368   | 0.805954 |
| PBX3        | 0.803631 |
| FABP5       | 0.803103 |
| DPP9        | 0.801865 |
| ZNF530      | 0.80117  |
| SP6         | 0.800405 |
| DHX33       | 0.799995 |
| HJURP       | 0.79938  |
| GINS1       | 0.798873 |

|              |          |
|--------------|----------|
| POLE2        | 0.798654 |
| AFG3L1P      | 0.797779 |
| C3orf14      | 0.797301 |
| DNAJC9       | 0.797101 |
| UTP15        | 0.796321 |
| LSM11        | 0.796047 |
| TNPO1        | 0.791973 |
| LOC100505634 | 0.791586 |
| TMEM209      | 0.791419 |
| STK39        | 0.791002 |
| FGF2         | 0.790361 |
| UHRF1        | 0.789734 |
| PLP2         | 0.789585 |
| PRSS23       | 0.789564 |
| CEP128       | 0.789461 |
| NRG1         | 0.789395 |
| DCLK1        | 0.789253 |
| FAM111A      | 0.786584 |
| UGGT1        | 0.78573  |
| LOC100190986 | 0.783919 |
| TTLL7        | 0.783708 |
| SLC4A4       | 0.78271  |
| DSN1         | 0.78264  |
| FBXO5        | 0.782348 |
| WHSC1        | 0.782323 |
| LPAR5        | 0.781868 |
| HSPH1        | 0.781813 |
| TBC1D4       | 0.780972 |
| RPS6KA4      | 0.780436 |
| UBE2C        | 0.779731 |
| CAP2         | 0.779725 |
| GCLM         | 0.777531 |
| DARS2        | 0.777474 |
| GPCPD1       | 0.777371 |
| GALNT14      | 0.777302 |
| CDK1         | 0.776678 |
| ASPH         | 0.775938 |
| TOP2A        | 0.775153 |
| EMG1         | 0.774842 |
| MAST2        | 0.773719 |

|              |          |
|--------------|----------|
| C1orf116     | 0.773654 |
| SUV39H1      | 0.773439 |
| TRABD2A      | 0.773423 |
| PSMC3        | 0.772731 |
| PGM2L1       | 0.772204 |
| GALNT7       | 0.77208  |
| MTHFD2       | 0.77182  |
| WDR77        | 0.771812 |
| TAGLN2       | 0.770887 |
| RBMX         | 0.770052 |
| LPAR3        | 0.769752 |
| SSR3         | 0.769506 |
| ITGA2        | 0.769459 |
| ARL14EPL     | 0.768843 |
| KLHL18       | 0.768097 |
| TMEM194A     | 0.767906 |
| PLCE1        | 0.767698 |
| ZSCAN12      | 0.767096 |
| VCL          | 0.766226 |
| TMEM18       | 0.766162 |
| KIF4A        | 0.765308 |
| MTOR         | 0.764707 |
| GOSR2        | 0.763855 |
| PCOLCE2      | 0.763427 |
| LMF2         | 0.763359 |
| KIF1C        | 0.763106 |
| CASZ1        | 0.763101 |
| LOC100132891 | 0.762859 |
| DNMT1        | 0.762456 |
| CCP110       | 0.762077 |
| TMEM79       | 0.761896 |
| URB2         | 0.759853 |
| P4HA2        | 0.759585 |
| PRSS3        | 0.759538 |
| FLNA         | 0.759301 |
| NDC80        | 0.758625 |
| CALU         | 0.758562 |
| KRT7,LINC005 | 0.758495 |
| PA2G4        | 0.757996 |
| CACHD1       | 0.757356 |

|               |          |
|---------------|----------|
| CCND1         | 0.75703  |
| ATG4A         | 0.7567   |
| ALDH1L2       | 0.75628  |
| STX11         | 0.755123 |
| CSNK1G1,KIAA  | 0.754803 |
| DPH3          | 0.75374  |
| PRIMA1        | 0.752274 |
| CEP152        | 0.75175  |
| F3            | 0.751428 |
| SDC1          | 0.751265 |
| PNPT1         | 0.751105 |
| CDKN1A        | 0.751086 |
| KLHL21        | 0.750825 |
| TUBB6         | 0.750143 |
| NUP205        | 0.74985  |
| MMS22L        | 0.749796 |
| PEA15         | 0.749679 |
| CDC6          | 0.749058 |
| WNT9A         | 0.748776 |
| TPX2          | 0.748055 |
| MIR548U       | 0.748027 |
| PTDSS1        | 0.747846 |
| JUN           | 0.747806 |
| GTF2H2B       | 0.746134 |
| CERK          | 0.746113 |
| SPATS2L       | 0.74599  |
| PLXNA1        | 0.745664 |
| SRPX          | 0.745381 |
| METTL4        | 0.745079 |
| ATAD3A,ATAD   | 0.744758 |
| LRRC59        | 0.744589 |
| FRS2          | 0.744573 |
| PARP2         | 0.744509 |
| HPRT1         | 0.744347 |
| ETS1          | 0.744317 |
| FANCG         | 0.744012 |
| C11orf91,CD5E | 0.743907 |
| DUSP7         | 0.743615 |
| C12orf5       | 0.74207  |
| NUP50         | 0.741635 |

|             |          |
|-------------|----------|
| TERT        | 0.741087 |
| FBXO45      | 0.740905 |
| SYNJ1       | 0.7399   |
| CENPJ       | 0.739625 |
| PAK1IP1     | 0.738542 |
| ITGA6       | 0.738317 |
| ZNF30       | 0.738106 |
| WDHD1       | 0.737946 |
| EIF2B3      | 0.73704  |
| SIK1        | 0.73693  |
| ZNF142      | 0.736765 |
| FANCD2      | 0.736295 |
| LOC642846   | 0.736122 |
| FAM54A      | 0.735839 |
| SMC2        | 0.735317 |
| SMC4        | 0.735306 |
| PINX1       | 0.735287 |
| FER         | 0.734931 |
| SH3KBP1     | 0.734703 |
| NOL9        | 0.734676 |
| BRCA1       | 0.733205 |
| MICALL1     | 0.732744 |
| ARHGEF26    | 0.731967 |
| MTMR9       | 0.731577 |
| BHLHE40     | 0.73042  |
| SMG1        | 0.72989  |
| RRM2        | 0.729375 |
| RFK         | 0.729334 |
| LRR1        | 0.728682 |
| GXYLT1      | 0.728663 |
| RPL26L1     | 0.727957 |
| MYEOV       | 0.727595 |
| MAP3K14     | 0.727293 |
| FIGNL1      | 0.727292 |
| ITGA4       | 0.727042 |
| NBPF24      | 0.726728 |
| GRAMD1B,LOC | 0.725739 |
| CEP55       | 0.725369 |
| MICB        | 0.725172 |
| HECW2       | 0.72406  |

|              |          |
|--------------|----------|
| C12orf4      | 0.723908 |
| FREM2        | 0.723359 |
| DMBX1        | 0.720755 |
| XPO4         | 0.720715 |
| TLN1         | 0.72064  |
| TIPIN        | 0.719198 |
| SLC5A6       | 0.718478 |
| TMEM98       | 0.718161 |
| KIF11        | 0.717906 |
| FANCM        | 0.717725 |
| GLI2         | 0.717635 |
| ZNF442       | 0.717599 |
| VARS         | 0.716682 |
| CD109        | 0.715864 |
| POPDC3       | 0.715087 |
| CD82         | 0.71473  |
| CS           | 0.714364 |
| IL32         | 0.714044 |
| MIS18A,URB1  | 0.713427 |
| LAMB3,MIR42c | 0.713336 |
| CBFB         | 0.712887 |
| HSPB8        | 0.712815 |
| C1orf112     | 0.712701 |
| FAM208B      | 0.712512 |
| GXYLT2       | 0.712335 |
| ACLY         | 0.711956 |
| FBN1         | 0.711829 |
| CEP85        | 0.711737 |
| UBR4         | 0.711718 |
| UBA6         | 0.711688 |
| RANBP1       | 0.711447 |
| PSMD11       | 0.711274 |
| PLGRKT       | 0.711265 |
| RTTN         | 0.708953 |
| GPATCH4      | 0.708399 |
| ALYREF       | 0.70789  |
| BCL2         | 0.707068 |
| PDCD11       | 0.706684 |
| AKAP12       | 0.706401 |
| GTSE1        | 0.705629 |

|             |          |
|-------------|----------|
| ATAD5       | 0.705573 |
| DTYMK       | 0.705332 |
| SYTL3       | 0.704815 |
| TOMM34      | 0.704744 |
| TFPI2       | 0.704086 |
| PFKFB2      | 0.70351  |
| TRAK2       | 0.702941 |
| FGD6        | 0.702448 |
| LAMB1       | 0.702075 |
| DKK1        | 0.701672 |
| ASF1B       | 0.701463 |
| KCTD9       | 0.701146 |
| SPSB4       | 0.700194 |
| FHL2        | 0.699941 |
| ZNF569      | 0.699151 |
| USP31       | 0.699101 |
| PBK         | 0.698474 |
| PSMD1       | 0.697487 |
| SNAI1       | 0.696472 |
| FSD1L       | 0.695302 |
| MAGOHB      | 0.694982 |
| HAUS8       | 0.694922 |
| MASTL       | 0.694916 |
| TNFRSF9     | 0.694746 |
| MRPL52      | 0.694409 |
| LMNB2       | 0.693888 |
| XRCC2       | 0.69342  |
| MYO10       | 0.692557 |
| ADRBK2      | 0.691793 |
| UNC13D      | 0.691674 |
| SLC27A4     | 0.691546 |
| EZH2        | 0.69147  |
| TRHDE       | 0.691012 |
| LRRC3,LRRC3 | 0.69048  |
| YWHAH       | 0.690433 |
| PALLD       | 0.690371 |
| POLR3K      | 0.689174 |
| PKMYT1      | 0.688897 |
| MSANTD3,MS/ | 0.68761  |
| CMSS1       | 0.687461 |



|               |          |
|---------------|----------|
| XPO5          | 0.687372 |
| KDELC2        | 0.687168 |
| TRIO          | 0.686935 |
| RAP1GAP       | 0.686819 |
| IRAK1,MIR718  | 0.686815 |
| STAG1         | 0.686135 |
| TEX30         | 0.685869 |
| C14orf105     | 0.685419 |
| S100A10       | 0.685379 |
| TUBGCP3       | 0.68521  |
| AEN           | 0.685064 |
| TSPAN5        | 0.684639 |
| RUVBL1        | 0.684506 |
| ALDH1B1       | 0.684125 |
| BUB1          | 0.684117 |
| PHF5A         | 0.684069 |
| SIRPA         | 0.684039 |
| ANKRD44       | 0.683976 |
| CACNA2D1      | 0.683519 |
| ADTRP         | 0.68171  |
| CYP24A1       | 0.681256 |
| WNK2          | 0.681123 |
| ANO4          | 0.680873 |
| LOC90784,POI  | 0.680676 |
| MNS1          | 0.679994 |
| EHBP1         | 0.679867 |
| ZNF473        | 0.679742 |
| HNRNPH3       | 0.679047 |
| KIAA1549      | 0.678974 |
| WDR76         | 0.678079 |
| TMEM106C      | 0.67802  |
| UAP1          | 0.677863 |
| AXL,HNRNPUL   | 0.677736 |
| RAB27A        | 0.676522 |
| MIR1292,NOP58 | 0.675428 |
| CCT5          | 0.674608 |
| LIN54         | 0.674257 |
| EHD4          | 0.67402  |
| NKD1          | 0.673615 |
| MRPL24        | 0.673569 |

|             |          |
|-------------|----------|
| EPT1        | 0.672745 |
| SLC7A6      | 0.671189 |
| MAPK11      | 0.670294 |
| SRXN1       | 0.670098 |
| CAMKK1      | 0.669842 |
| FERMT2      | 0.669832 |
| GABPB1      | 0.669318 |
| SPAG5       | 0.66754  |
| TIMM10      | 0.666227 |
| GPR63       | 0.666202 |
| MRT04       | 0.665861 |
| RPL39       | 0.665807 |
| EFHD2       | 0.665394 |
| TUBA1C      | 0.663617 |
| SPARC       | 0.663212 |
| AP1M2       | 0.663173 |
| KIF2C       | 0.663047 |
| CIRH1A      | 0.66194  |
| PLOD3       | 0.661502 |
| C15orf23    | 0.661384 |
| GEN1        | 0.66111  |
| SNHG15      | 0.66091  |
| KIF23,PAQR5 | 0.660368 |
| GJB3        | 0.66009  |
| NCAPD3      | 0.65967  |
| CORO1C      | 0.658852 |
| RELT        | 0.658835 |
| PRR11       | 0.658423 |
| USP13       | 0.65828  |
| POP1        | 0.658158 |
| MMP16       | 0.657553 |
| HCFC1       | 0.65713  |
| ABL2        | 0.657021 |
| MDC1        | 0.65697  |
| SCFD2       | 0.656864 |
| ICMT        | 0.656824 |
| RGPD8       | 0.656601 |
| ZMIZ1       | 0.655905 |
| ERCC4       | 0.655624 |
| NAA15       | 0.655179 |

|              |          |
|--------------|----------|
| PRDM2        | 0.655139 |
| LOC440288    | 0.65484  |
| C18orf54     | 0.654713 |
| FAM72B       | 0.654441 |
| POLR3A       | 0.654155 |
| AP4E1        | 0.653996 |
| SRM          | 0.6539   |
| ZNF26        | 0.653496 |
| KIF21A       | 0.653416 |
| NAV1         | 0.653128 |
| PTAR1        | 0.65279  |
| FAM105A      | 0.652382 |
| CRIM1        | 0.65229  |
| SH3RF1       | 0.652265 |
| SEPT11       | 0.65185  |
| TNFRSF19     | 0.651789 |
| AUNIP        | 0.650953 |
| CNN3         | 0.650597 |
| DTL          | 0.650005 |
| KPNB1        | 0.649614 |
| GPX8         | 0.649411 |
| STARD13      | 0.64909  |
| TMEM87A      | 0.649032 |
| EMC1         | 0.648794 |
| ELF4         | 0.647522 |
| FAM177A1     | 0.647224 |
| TTL          | 0.646787 |
| RAP1GDS1     | 0.646585 |
| VGLL3        | 0.646288 |
| MARS         | 0.646008 |
| TYMS         | 0.64575  |
| BOP1         | 0.645521 |
| FAM86JP      | 0.645279 |
| OTUD6B       | 0.645199 |
| LOC100287314 | 0.64479  |
| ZFAND2A      | 0.644532 |
| MED27        | 0.644196 |
| CDC20        | 0.644023 |
| MSN          | 0.643905 |
| METTL21D     | 0.643878 |

|              |          |
|--------------|----------|
| NOM1         | 0.643872 |
| FZD8         | 0.643752 |
| SLC36A1      | 0.643097 |
| ENTPD5       | 0.642653 |
| CDKN2D       | 0.642248 |
| THAP10       | 0.642088 |
| TTPAL        | 0.641572 |
| CLPB         | 0.641336 |
| FAM72A       | 0.641327 |
| PRPF8        | 0.640366 |
| P2RX5,P2RX5- | 0.640221 |
| NUPL1        | 0.640072 |
| C18orf25     | 0.639795 |
| SYNJ2        | 0.63931  |
| SLX4         | 0.63878  |
| WBSCR22      | 0.638483 |
| GPR137C      | 0.638381 |
| FUBP1        | 0.637808 |
| POLA1        | 0.637327 |
| MARK1        | 0.637116 |
| RRP1B        | 0.636818 |
| PASK         | 0.636631 |
| ADAM23       | 0.636591 |
| MAD2L1       | 0.636182 |
| MPHOSPH9     | 0.635815 |
| ASAP1        | 0.635468 |
| GPR89A       | 0.634937 |
| DOT1L        | 0.634772 |
| NCAPD2       | 0.634648 |
| EIF3C        | 0.634604 |
| MPHOSPH6     | 0.633635 |
| CEP78        | 0.633117 |
| EML1         | 0.633031 |
| RUNX1        | 0.631722 |
| TUBG1        | 0.631673 |
| BTG3         | 0.631379 |
| FBXO43       | 0.630804 |
| ERVMER34-1   | 0.630674 |
| IPO5         | 0.630623 |
| HEATR8,HEAT  | 0.629731 |

|              |          |
|--------------|----------|
| TRAPPC10     | 0.629575 |
| TACC3        | 0.629179 |
| TYRO3        | 0.629137 |
| MAPRE1       | 0.627786 |
| CENPF        | 0.627141 |
| AMPH         | 0.62677  |
| PRIM1        | 0.626454 |
| MLF1IP       | 0.626223 |
| HSPA8        | 0.626108 |
| PCNT         | 0.626083 |
| MAN2A1       | 0.625254 |
| IRX5         | 0.625149 |
| POLR3F       | 0.625112 |
| INPP4B       | 0.625107 |
| NOTCH2       | 0.624953 |
| PIGA         | 0.624217 |
| ABCE1        | 0.624188 |
| DNA2         | 0.624186 |
| KIAA1731     | 0.624054 |
| ATP10D       | 0.623845 |
| RFWD3        | 0.623633 |
| ZNF844       | 0.623517 |
| PEAK1        | 0.623111 |
| AKAP2,PALM2, | 0.622796 |
| ROCK2        | 0.622523 |
| IFFO2        | 0.621746 |
| PTN          | 0.62137  |
| KLF6         | 0.61955  |
| NT5E         | 0.619487 |
| FAM167A      | 0.619237 |
| VRK1         | 0.619192 |
| PHF19        | 0.618903 |
| C3orf80      | 0.618691 |
| MTHFD1L      | 0.618585 |
| LOC595101    | 0.618385 |
| MOB3B        | 0.618197 |
| FARSB        | 0.617557 |
| OCIAD2       | 0.617359 |
| ORC3         | 0.61708  |
| HAUS7        | 0.616136 |

|             |          |
|-------------|----------|
| CCND3       | 0.615208 |
| MDM1        | 0.615011 |
| PSMD12      | 0.614189 |
| ACTN1       | 0.614022 |
| TUBB        | 0.614002 |
| GPD2        | 0.613587 |
| SYDE2       | 0.613464 |
| HNRNPA3,MIR | 0.613195 |
| GFM1,LOC100 | 0.613027 |
| N4BP2       | 0.612965 |
| RHOC        | 0.611971 |
| FAM178A     | 0.611863 |
| TOMM40      | 0.611819 |
| FOXM1       | 0.611279 |
| GEMIN5      | 0.6112   |
| MLL2        | 0.610643 |
| XPO6        | 0.610529 |
| PSMG3       | 0.610222 |
| AAK1        | 0.61018  |
| HECTD2      | 0.61017  |
| RCC1,SNHG3  | 0.609812 |
| NABP1       | 0.609465 |
| ST7L        | 0.609399 |
| MCAM        | 0.609221 |
| ADAT1       | 0.609194 |
| EPG5        | 0.608995 |
| PFDN4       | 0.608697 |
| TPM3        | 0.6085   |
| IDH3A       | 0.608492 |
| GREB1L      | 0.608447 |
| HSPA4L      | 0.608153 |
| TOPBP1      | 0.608113 |
| SKP2        | 0.606798 |
| CLMP        | 0.606541 |
| FOXJ2,NECAP | 0.605876 |
| HMGXB4      | 0.605695 |
| NF2         | 0.60557  |
| STC2        | 0.605488 |
| ZNF583      | 0.605328 |
| RAB31       | 0.604846 |

|          |          |
|----------|----------|
| PAWR     | 0.604534 |
| GDAP1    | 0.604352 |
| PLEC     | 0.604107 |
| RASAL2   | 0.603747 |
| LHFPL2   | 0.602523 |
| GNB4     | 0.60177  |
| FAM111B  | 0.601046 |
| TMX3     | 0.600879 |
| DDX39A   | 0.600852 |
| PVR      | 0.600789 |
| HERC1    | 0.600353 |
| C17orf85 | 0.600147 |
| NUP85    | 0.600064 |
| PRICKLE2 | 0.599338 |
| NUP107   | 0.599189 |
| TMOD2    | 0.598555 |
| SENP1    | 0.598423 |
| FANCC    | 0.598416 |
| CEP85L   | 0.598238 |
| ANKLE2   | 0.597818 |
| KIF20B   | 0.597789 |
| GMNN     | 0.597603 |
| NDUFAF2  | 0.597582 |
| MICALL2  | 0.597279 |
| CKS2     | 0.597201 |
| NEDD4    | 0.596597 |
| SLC35D1  | 0.596112 |
| CDC7     | 0.595891 |
| ASCC3    | 0.595735 |
| WDR1     | 0.595644 |
| SMURF2   | 0.595447 |
| ARID5A   | 0.595055 |
| PDLIM3   | 0.594886 |
| DCLK2    | 0.594875 |
| ATP1B3   | 0.594631 |
| HELLS    | 0.594058 |
| SUSD5    | 0.594052 |
| C16orf59 | 0.593509 |
| STT3A    | 0.593268 |
| SERTAD4  | 0.593165 |

|             |          |
|-------------|----------|
| UFD1L       | 0.592839 |
| C11orf24    | 0.592247 |
| LSG1        | 0.59203  |
| NOLC1,PPRC1 | 0.591482 |
| TAP2        | 0.591356 |
| HS6ST2      | 0.590262 |
| DPYSL5      | 0.589747 |
| LINC00346   | 0.589661 |
| EPHB2       | 0.589509 |
| DDAH1       | 0.589448 |
| RRP15       | 0.588621 |
| BMP2K       | 0.588494 |
| ERGIC2      | 0.588127 |
| CCT6A       | 0.58793  |
| HDAC9       | 0.587908 |
| GLT25D1     | 0.587434 |
| BCAP29      | 0.587412 |
| ASPM        | 0.587189 |
| DCLRE1C     | 0.587168 |
| LHX1        | 0.586616 |
| NUP214      | 0.58639  |
| BRX1        | 0.585964 |
| F2RL1       | 0.585728 |
| CSE1L       | 0.585554 |
| TCP1        | 0.585087 |
| PFAS        | 0.585078 |
| KIAA0020    | 0.58499  |
| NELL2       | 0.58448  |
| MTHFD1      | 0.583871 |
| ITPR2       | 0.583119 |
| GRB10       | 0.58239  |
| NIP7        | 0.582085 |
| PTPRD       | 0.582011 |
| BIRC5       | 0.581998 |
| DCP2        | 0.581749 |
| MRPS11      | 0.581471 |
| MTX3        | 0.58135  |
| HMGB1       | 0.580844 |
| KRT80       | 0.580812 |
| USP43       | 0.580675 |



|              |          |
|--------------|----------|
| MIR4687,RRM1 | 0.580656 |
| FAM102A      | 0.580646 |
| FLVCR1       | 0.580634 |
| GPR4         | 0.580365 |
| SGOL2        | 0.580317 |
| NAA25        | 0.580286 |
| C6orf228     | 0.580084 |
| LINC00152    | 0.579411 |
| CKAP5        | 0.57927  |
| PSMB2        | 0.57822  |
| LIFR         | 0.578157 |
| HSPD1        | 0.577254 |
| LAS1L        | 0.577184 |
| BDP1         | 0.57675  |
| ATF4         | 0.575812 |
| FAM126B      | 0.575634 |
| LOC100216001 | 0.575603 |
| ACVR1        | 0.575061 |
| ITGAV        | 0.574912 |
| BEND3        | 0.574877 |
| IPO7         | 0.574336 |
| GALNT2       | 0.574248 |
| COTL1        | 0.574019 |
| MYO5B        | 0.573962 |
| PROSER1      | 0.573798 |
| ABCB10       | 0.573782 |
| HMGB2        | 0.573483 |
| BMPR1B       | 0.573441 |
| TSHZ3        | 0.573189 |
| CBL          | 0.5728   |
| ZNHIT6       | 0.572774 |
| LTV1         | 0.572665 |
| SNRPE        | 0.572364 |
| KLF4         | 0.571732 |
| ERI2         | 0.571713 |
| GINS4        | 0.57128  |
| HNRNPL       | 0.571034 |
| IQCJ,IQCJ-SC | 0.570612 |
| WDFY2        | 0.570244 |
| ARID3B       | 0.570027 |

|              |          |
|--------------|----------|
| UBR7         | 0.57     |
| TFRC         | 0.569067 |
| EXO5         | 0.568901 |
| PLAGL2       | 0.568379 |
| MED14        | 0.567684 |
| CSRP2        | 0.567506 |
| GPR180       | 0.567314 |
| ZCCHC2       | 0.567202 |
| TMEM104      | 0.566934 |
| CYP27C1      | 0.566321 |
| POLE3        | 0.566249 |
| SASS6        | 0.566132 |
| LOC100294145 | 0.565915 |
| C17orf51     | 0.565352 |
| IARS         | 0.565163 |
| SNRPG        | 0.564269 |
| EIF2C2       | 0.563255 |
| PPARGC1B     | 0.563145 |
| PCSK5        | 0.563077 |
| NLE1         | 0.562662 |
| RRP12        | 0.561603 |
| EMP2         | 0.561568 |
| CTNNAL1      | 0.561374 |
| ALKBH8       | 0.561126 |
| STIP1        | 0.560677 |
| ZW10         | 0.560198 |
| OAS3         | 0.560099 |
| DDX11        | 0.560031 |
| TMTC3        | 0.559982 |
| CDR2         | 0.559942 |
| RPL22L1      | 0.559855 |
| FGFR10P      | 0.559711 |
| EIF4E        | 0.559623 |
| PLAA         | 0.559084 |
| MT1X         | 0.558966 |
| BZW1         | 0.558816 |
| DKC1         | 0.558502 |
| LZIC         | 0.557978 |
| ODC1         | 0.55774  |
| ARMC4        | 0.557677 |

|              |          |
|--------------|----------|
| IGF2R        | 0.5571   |
| CTSL2        | 0.556818 |
| RHOB         | 0.556734 |
| KIFC1,PHF1   | 0.556393 |
| HN1          | 0.556287 |
| PHLPP2       | 0.555123 |
| QTRTD1       | 0.554308 |
| TOP3A        | 0.553954 |
| POLD3,RNF16  | 0.553681 |
| MICAL3       | 0.553517 |
| IGHMBP2      | 0.553144 |
| BCLAF1       | 0.552914 |
| TMEM48       | 0.552647 |
| SBDS         | 0.55258  |
| TIMM21       | 0.55256  |
| ABHD5        | 0.552189 |
| NHEJ1        | 0.551977 |
| EIF4G2       | 0.551802 |
| KIAA1462     | 0.551487 |
| MIR621,SLC25 | 0.551189 |
| CHAF1B       | 0.551013 |
| OTUD3        | 0.550507 |
| RFT1         | 0.550503 |
| ZNF81        | 0.550225 |
| ARHGAP10     | 0.549884 |
| SNRNP40      | 0.549845 |
| PITRM1       | 0.54912  |
| HSPA12A      | 0.548767 |
| CCDC58       | 0.54875  |
| PDLIM7       | 0.548732 |
| HIGD1A       | 0.54861  |
| NCAPH2       | 0.547742 |
| RASSF8       | 0.547737 |
| NOP2         | 0.54753  |
| AGAP1        | 0.547167 |
| PGBD1        | 0.547013 |
| ARSJ         | 0.546951 |
| MGC27345,RB  | 0.546663 |
| LRRC20       | 0.546301 |
| KIF22        | 0.546192 |

|             |          |
|-------------|----------|
| SGOL1       | 0.545604 |
| SAMD4B      | 0.545504 |
| DHODH       | 0.545331 |
| PRRC2C      | 0.544726 |
| TFDP1       | 0.544439 |
| SLC35B1     | 0.544026 |
| ZAK         | 0.543734 |
| SEMA4F      | 0.543548 |
| LRRK1       | 0.543473 |
| CHEK1       | 0.543414 |
| C2orf69     | 0.542972 |
| SMC6        | 0.54241  |
| PHTF2       | 0.542271 |
| FAM83D      | 0.542223 |
| SSX2IP      | 0.541949 |
| RBBP5       | 0.541356 |
| LETM2       | 0.541155 |
| AATF        | 0.541026 |
| IPO13       | 0.540948 |
| GPC1        | 0.540302 |
| NOL12       | 0.540014 |
| GCN1L1      | 0.539911 |
| SPAG9       | 0.53958  |
| CDK5RAP2    | 0.53956  |
| MNF1        | 0.539244 |
| MATN3       | 0.538775 |
| RMI1        | 0.538534 |
| NUP153      | 0.538104 |
| SP2         | 0.537851 |
| ARL13B      | 0.537181 |
| CALML4,CLN6 | 0.53705  |
| SOGA2       | 0.53705  |
| GEMIN6      | 0.536812 |
| PNN         | 0.536112 |
| DLC1        | 0.535843 |
| DZIP1L      | 0.535801 |
| MMGT1       | 0.535741 |
| XPOT        | 0.53558  |
| TTK         | 0.535555 |
| MAP3K4      | 0.535514 |

|              |          |
|--------------|----------|
| CIT,MIR1178  | 0.535378 |
| RECQL        | 0.534896 |
| ZFP28        | 0.534831 |
| MAPKAP1      | 0.534311 |
| TGM2         | 0.534257 |
| ITPRIPL2     | 0.534199 |
| PRADC1       | 0.534056 |
| ELOVL1       | 0.534007 |
| ALDH1A3      | 0.533959 |
| ZNF347       | 0.533901 |
| ACAP3        | 0.533705 |
| CKS1B        | 0.532984 |
| GNPNAT1      | 0.532634 |
| GJA1         | 0.532099 |
| SFMBT1       | 0.531944 |
| HHAT         | 0.531845 |
| LOC100506124 | 0.531817 |
| POLR2A       | 0.531721 |
| NUF2         | 0.531428 |
| SRPRB        | 0.531293 |
| DCBLD2       | 0.53109  |
| KCMF1        | 0.531013 |
| PVRL1        | 0.530836 |
| JAK2         | 0.530819 |
| NPLOC4       | 0.530276 |
| LARP4        | 0.530079 |
| LIN9         | 0.529986 |
| TPRKB        | 0.529973 |
| HIATL1       | 0.529926 |
| RB1          | 0.529152 |
| TEX261       | 0.528926 |
| MZT1         | 0.528865 |
| SCML1        | 0.52857  |
| WDR5         | 0.528141 |
| TMEM38B      | 0.528004 |
| ZNF441       | 0.527769 |
| FAM65A       | 0.527712 |
| BRI3BP       | 0.527668 |
| CEP97        | 0.527105 |
| RFC3         | 0.526352 |

|              |          |
|--------------|----------|
| FSTL1,MIR198 | 0.526132 |
| MGST1        | 0.52607  |
| SRPR         | 0.526006 |
| UTP11L       | 0.525999 |
| SIPA1L1      | 0.525976 |
| LYSMD4       | 0.525826 |
| DHDDS        | 0.525754 |
| NCBP1        | 0.525517 |
| RAN          | 0.525498 |
| HIRIP3       | 0.524993 |
| USP36        | 0.524545 |
| ANXA5        | 0.52428  |
| ABHD3        | 0.523735 |
| EIF4G1       | 0.523439 |
| ANAPC7       | 0.52266  |
| BRPF1        | 0.522179 |
| ZWILCH       | 0.521871 |
| TNRC6C       | 0.521143 |
| RAD54L       | 0.520615 |
| DOCK5        | 0.520272 |
| ENTPD1       | 0.520094 |
| HMMR         | 0.519907 |
| ANP32E       | 0.519525 |
| SGMS1        | 0.519257 |
| C22orf25     | 0.519026 |
| PRPF4        | 0.518691 |
| NDST1        | 0.518534 |
| MYBBP1A      | 0.518216 |
| HERC2        | 0.517976 |
| CDON         | 0.517928 |
| CALM2        | 0.517682 |
| TCERG1       | 0.517673 |
| AURKA        | 0.517603 |
| CEP72        | 0.517093 |
| LIN52        | 0.516507 |
| PLEKHA6      | 0.516312 |
| TBP          | 0.515809 |
| ADRM1        | 0.515432 |
| SUCO         | 0.515185 |
| HEG1         | 0.514842 |

|             |          |
|-------------|----------|
| CENPM       | 0.514833 |
| POC1A       | 0.514676 |
| SMS         | 0.514262 |
| AFAP1L1     | 0.514133 |
| SETD8       | 0.514054 |
| STRA13      | 0.513509 |
| ARHGEF10    | 0.513451 |
| INPP5A      | 0.51333  |
| ZFP30       | 0.512537 |
| STAM        | 0.512509 |
| NEURL1B     | 0.512442 |
| ENDOD1      | 0.5118   |
| U2SURP      | 0.511719 |
| TMEM206     | 0.511567 |
| SUPT16H     | 0.51148  |
| WEE1        | 0.511251 |
| FAM126A     | 0.510664 |
| ACTL6A      | 0.510602 |
| DPH2        | 0.510403 |
| FEM1C       | 0.510007 |
| CDCA3       | 0.50933  |
| ATG16L1     | 0.509257 |
| B4GALT2     | 0.509046 |
| BNIP1       | 0.508897 |
| DNAJC10     | 0.50875  |
| GNL2        | 0.508714 |
| BVES        | 0.508629 |
| PER3        | 0.50836  |
| UACA        | 0.508168 |
| TUBB4B      | 0.507946 |
| EPHA2       | 0.50768  |
| MBOAT2      | 0.507634 |
| RAD23B      | 0.507379 |
| PAICS       | 0.507225 |
| PDCD5       | 0.507191 |
| SOAT1       | 0.506775 |
| SON         | 0.50661  |
| CTDSPL2     | 0.506411 |
| AP1S2       | 0.505831 |
| NRF1,RNA5SP | 0.505378 |

|               |          |
|---------------|----------|
| MIR1825,POFL  | 0.505125 |
| COPS3         | 0.505063 |
| HDGFRP3       | 0.504954 |
| SLC25A22      | 0.504798 |
| TTLL4         | 0.504771 |
| ZNF585A       | 0.504722 |
| C10orf47      | 0.504689 |
| NR2C1         | 0.504588 |
| NUP35         | 0.504557 |
| LPP           | 0.504414 |
| LRRC14        | 0.504245 |
| RABGGTB       | 0.503958 |
| ATXN7         | 0.50369  |
| SNRPA1        | 0.503653 |
| MIP,TIMELESS  | 0.503652 |
| NDOR1         | 0.502819 |
| C1orf151-NBL1 | 0.502546 |
| LCAT,SLC12A4  | 0.502102 |
| ARHGAP29      | 0.501931 |
| KLHL20        | 0.501584 |
| KLHL15        | 0.501198 |
| NUP93         | 0.500726 |
| TMEM54        | 0.500411 |
| RANBP2        | 0.500222 |
| FAM98A        | 0.49956  |
| FEN1          | 0.499505 |
| VBP1          | 0.499484 |
| PVRL3         | 0.499344 |
| TMEM208       | 0.498734 |
| NCL           | 0.498353 |
| TIMM17A       | 0.498329 |
| TARDBP        | 0.498104 |
| RPL21         | 0.497871 |
| DSCC1,TAF2    | 0.497857 |
| CCDC88A       | 0.497848 |
| NOMO1         | 0.497431 |
| SMG6          | 0.497179 |
| KIF14         | 0.496851 |
| AADAT         | 0.496307 |
| C20orf72      | 0.495933 |



|             |          |
|-------------|----------|
| LOC388796   | 0.495519 |
| HNRNPAB     | 0.495372 |
| ZNF280C     | 0.495344 |
| CEBPG       | 0.495335 |
| NVL         | 0.495113 |
| TNPO2       | 0.494531 |
| FUT4,PIWIL4 | 0.494404 |
| ZNF271      | 0.494238 |
| HAUS3,POLN  | 0.494144 |
| H2AFZ       | 0.494134 |
| NID2        | 0.49379  |
| C5orf30     | 0.493748 |
| RRP7A,RRP7B | 0.493564 |
| ABCF2       | 0.493475 |
| TRIM16      | 0.493266 |
| DVL1        | 0.493253 |
| RNF168      | 0.493164 |
| NCEH1       | 0.492809 |
| TAF9B       | 0.49278  |
| MTFP1       | 0.492674 |
| PRPS2       | 0.492468 |
| TPR         | 0.492318 |
| SMC3        | 0.492102 |
| PTBP1       | 0.491848 |
| TACC1       | 0.491845 |
| LARS2       | 0.491815 |
| GRWD1       | 0.49164  |
| MED20       | 0.49137  |
| JMJD6       | 0.490763 |
| FAM58A      | 0.490454 |
| BRCC3       | 0.490432 |
| KIF5B       | 0.48984  |
| EIF1AX      | 0.489787 |
| USP1        | 0.489559 |
| NR1D2       | 0.488911 |
| BAZ1A       | 0.48876  |
| LYAR        | 0.487611 |
| RNASEH1     | 0.487162 |
| PDPK1       | 0.487025 |
| TMED5       | 0.486888 |

|              |          |
|--------------|----------|
| SLC38A9      | 0.486741 |
| ABHD2        | 0.486571 |
| PSMD6        | 0.486429 |
| RIF1         | 0.486408 |
| SPECC1L      | 0.486146 |
| ZNF280B      | 0.486022 |
| PPTC7        | 0.48596  |
| NEDD1        | 0.485508 |
| C9orf91      | 0.485114 |
| C5orf34      | 0.484825 |
| PTPLB        | 0.484613 |
| JOSD1        | 0.484526 |
| C1orf109     | 0.484438 |
| ITFG2        | 0.484408 |
| ADPGK        | 0.484123 |
| METTL1       | 0.48336  |
| PSMD7        | 0.483276 |
| CDK8         | 0.482881 |
| HNRPDL       | 0.482584 |
| DENND1B      | 0.482126 |
| SZT2         | 0.481855 |
| WDR36        | 0.481795 |
| GGCT         | 0.481695 |
| DIXDC1,DLAT  | 0.481639 |
| LSM6         | 0.481579 |
| LOC100996625 | 0.481452 |
| NPNT         | 0.481265 |
| MBOAT1       | 0.481057 |
| FSBP,RAD54B  | 0.481052 |
| ATAD2B       | 0.480568 |
| SMCHD1       | 0.480326 |
| HTT          | 0.480222 |
| PTPDC1       | 0.480076 |
| TMEM97       | 0.479926 |
| PSME3        | 0.479924 |
| IPO9         | 0.479675 |
| LRP12        | 0.479441 |
| TBC1D2B      | 0.479321 |
| FAM35A       | 0.479156 |
| DCK          | 0.478378 |

|              |          |
|--------------|----------|
| GOLT1B       | 0.477947 |
| PYCR1        | 0.477689 |
| INTS6        | 0.477267 |
| SF3B3        | 0.477069 |
| MARVELD2     | 0.476991 |
| SMPD4        | 0.476919 |
| WDR44        | 0.476718 |
| EPB41L2      | 0.476599 |
| GTF3C6       | 0.476587 |
| HEATR1       | 0.476094 |
| SF3A3        | 0.476081 |
| OPA1         | 0.475811 |
| SNRPD1       | 0.475619 |
| HSPA9        | 0.475379 |
| NSFL1C       | 0.475326 |
| GRPEL1       | 0.475301 |
| RPP14        | 0.475141 |
| CDC42SE1     | 0.474686 |
| TRAIP        | 0.474204 |
| SMAD9        | 0.47397  |
| ZNF699       | 0.473719 |
| ERO1L        | 0.473547 |
| GLI3         | 0.472966 |
| PLK2         | 0.472862 |
| RAB23        | 0.47277  |
| ZNF256       | 0.472534 |
| EIF5A2       | 0.471585 |
| SEMA3C       | 0.471116 |
| USP47        | 0.470912 |
| CPSF2        | 0.470912 |
| UGGT2        | 0.470662 |
| IQGAP1,ZNF71 | 0.47053  |
| MED13        | 0.470213 |
| VAPB         | 0.470147 |
| CEP135       | 0.469355 |
| ZNF823       | 0.469302 |
| TMEM201      | 0.46893  |
| COPS8        | 0.468762 |
| GINS2        | 0.468688 |
| LARS         | 0.468649 |

|          |          |
|----------|----------|
| COL27A1  | 0.468235 |
| CCDC14   | 0.468225 |
| DIP2B    | 0.467853 |
| FH       | 0.467802 |
| CLDND1   | 0.467497 |
| CHN1     | 0.46683  |
| GRPEL2   | 0.466772 |
| PLAT     | 0.466457 |
| SEPT10   | 0.466373 |
| HAT1     | 0.466111 |
| DGKZ     | 0.466073 |
| XPO1     | 0.466061 |
| DICER1   | 0.465875 |
| PRKCE    | 0.465709 |
| TRIM24   | 0.465045 |
| TTC7B    | 0.464692 |
| ITPRIP   | 0.464591 |
| ABTB2    | 0.463974 |
| AHCTF1   | 0.463941 |
| ZNF678   | 0.463802 |
| CEP350   | 0.463762 |
| KPNA3    | 0.463711 |
| ARHGAP21 | 0.463563 |
| H2AFY    | 0.462172 |
| TWF1     | 0.462107 |
| GBF1     | 0.462004 |
| C19orf48 | 0.461588 |
| SLC19A1  | 0.461374 |
| CLOCK    | 0.461374 |
| TOMM5    | 0.461109 |
| DENR     | 0.460972 |
| RPS6KA3  | 0.460809 |
| SLC4A7   | 0.460652 |
| NUP98    | 0.460517 |
| YKT6     | 0.460454 |
| NUDT19   | 0.460394 |
| NIN      | 0.459869 |
| APMAP    | 0.45934  |
| PDRG1    | 0.459202 |
| SNX10    | 0.45911  |

|              |          |
|--------------|----------|
| CCNE1        | 0.458878 |
| CCT2         | 0.458802 |
| THAP9-AS1    | 0.458756 |
| USP45        | 0.458726 |
| L3MBTL2      | 0.458681 |
| SFR1         | 0.45859  |
| B3GALTL      | 0.458587 |
| CENPA        | 0.457907 |
| SLC25A25     | 0.457764 |
| PRKAR2A      | 0.457643 |
| COL17A1,MIR5 | 0.45721  |
| TNPO3        | 0.456912 |
| VANGL1       | 0.456617 |
| LDLRAD3      | 0.456324 |
| SNX18        | 0.456068 |
| C10orf2      | 0.456023 |
| EIF5         | 0.455756 |
| OGFOD1       | 0.455316 |
| ARAP2        | 0.455227 |
| SLC8A1       | 0.455148 |
| FUNDC2       | 0.45504  |
| MGAT5        | 0.454993 |
| DCTN5,PLK1   | 0.454138 |
| CPOX         | 0.453779 |
| FRAS1        | 0.453385 |
| MPDU1        | 0.453357 |
| ASH2L        | 0.453294 |
| CDH24        | 0.453142 |
| MRPL18       | 0.453024 |
| RNASEH2A     | 0.451938 |
| NAT10        | 0.45178  |
| FAM82A2      | 0.451745 |
| CEP170       | 0.451671 |
| DLGAP5       | 0.451125 |
| BLZF1        | 0.451062 |
| CREBBP       | 0.451021 |
| CCDC86       | 0.450875 |
| DHFR         | 0.450602 |
| C8orf33      | 0.450554 |
| SNRNP27      | 0.450278 |

|              |          |
|--------------|----------|
| SLCO1B3,SLC1 | 0.450034 |
| C1orf212     | 0.44946  |
| KIAA0664     | 0.448942 |
| CLASP2       | 0.448198 |
| RRS1         | 0.447958 |
| DHX9         | 0.447934 |
| GPAM         | 0.447715 |
| PIGK         | 0.447595 |
| GSTCD        | 0.447531 |
| EPDR1        | 0.447439 |
| RPS26        | 0.447419 |
| MCM2         | 0.44736  |
| ZBTB2        | 0.447281 |
| B3GNT5       | 0.447204 |
| TXNRD1       | 0.447136 |
| FBF1         | 0.446502 |
| TGOLN2       | 0.446056 |
| DPYSL3       | 0.445546 |
| RAB3B        | 0.44511  |
| DLST         | 0.444809 |
| TXN          | 0.444242 |
| SLAIN2       | 0.444124 |
| DESI2        | 0.444    |
| MFN2         | 0.443279 |
| KIAA0922     | 0.443211 |
| WWC3         | 0.443053 |
| CEP250       | 0.442802 |
| TDG          | 0.442786 |
| ITGA5        | 0.442674 |
| MARS2        | 0.442591 |
| ANKRD33B     | 0.442231 |
| ACP1         | 0.441906 |
| DDX51        | 0.441824 |
| GALNT10      | 0.441806 |
| DENND4B      | 0.441734 |
| NR3C1        | 0.441595 |
| LRRC8C       | 0.441454 |
| SEC61G       | 0.441442 |
| RAPGEF2      | 0.441199 |
| DLG5         | 0.440624 |

|              |          |
|--------------|----------|
| FLNC         | 0.440552 |
| CCDC34       | 0.440454 |
| PFDN1        | 0.440319 |
| AGPS         | 0.439618 |
| ATR          | 0.439422 |
| TK1          | 0.439407 |
| MLL          | 0.439367 |
| NRP2         | 0.439354 |
| TTC13        | 0.439169 |
| NAA50        | 0.439033 |
| NPM1         | 0.438526 |
| TUB          | 0.438387 |
| TMEM51       | 0.437795 |
| FOXN2        | 0.437381 |
| TRMT6        | 0.437345 |
| MED15        | 0.437129 |
| DNAJB2       | 0.436798 |
| MIR3658,UCK2 | 0.436546 |
| CHD7         | 0.435843 |
| FAM171A1     | 0.435732 |
| TMCC1        | 0.435402 |
| NBPF14       | 0.435048 |
| LARP4B       | 0.435011 |
| EIF5A        | 0.434888 |
| MCM3AP       | 0.434541 |
| MESDC1       | 0.434198 |
| BZW2         | 0.434133 |
| SF3A1        | 0.433983 |
| RBX1         | 0.433883 |
| TMEM2        | 0.433414 |
| USP38        | 0.43341  |
| MTMR2        | 0.433216 |
| EXTL3        | 0.433191 |
| UPF1         | 0.433162 |
| GCNT2        | 0.432771 |
| PDS5B        | 0.432175 |
| DNAJC21      | 0.432144 |
| RAPH1        | 0.432094 |
| PTPN11       | 0.431989 |
| ADAMTS15     | 0.431707 |

|          |          |
|----------|----------|
| AP3M1    | 0.431525 |
| DYRK1A   | 0.431496 |
| CCSAP    | 0.431302 |
| HN1L     | 0.431261 |
| FGFR1    | 0.43114  |
| FAM219A  | 0.430387 |
| PGP      | 0.428895 |
| PDS5A    | 0.428879 |
| PPWD1    | 0.428809 |
| NDUFA12  | 0.428783 |
| POLR2K   | 0.428272 |
| GAS6     | 0.428039 |
| FKBP4    | 0.428004 |
| GATAD2A  | 0.427619 |
| ATL2     | 0.427563 |
| AMOTL1   | 0.426897 |
| ZFX      | 0.426733 |
| ATP13A3  | 0.42673  |
| RNF138   | 0.426555 |
| NANP     | 0.42643  |
| MAP3K2   | 0.426313 |
| MAPK6    | 0.426204 |
| LRRC8A   | 0.426084 |
| DDX55    | 0.425613 |
| BYSL     | 0.425609 |
| DEPDC1B  | 0.425525 |
| PANX1    | 0.425193 |
| CDK5RAP1 | 0.424727 |
| HBS1L    | 0.424674 |
| PSMC6    | 0.423917 |
| SELT     | 0.42375  |
| PAQR3    | 0.423554 |
| MCM4     | 0.423525 |
| ABR      | 0.423499 |
| SH3PXD2A | 0.423205 |
| GTF2A2   | 0.423118 |
| ZBTB40   | 0.423068 |
| PTTG1    | 0.422969 |
| RHEB     | 0.422808 |
| CHID1    | 0.422758 |



|           |          |
|-----------|----------|
| SPCS3     | 0.422501 |
| CACYBP    | 0.422369 |
| PIGU      | 0.421649 |
| ISOC1     | 0.421648 |
| TEX2      | 0.421395 |
| DENND6A   | 0.420994 |
| HSPA1A    | 0.420866 |
| DIEXF     | 0.420719 |
| SLC35F2   | 0.42044  |
| NCLN      | 0.419623 |
| PTPRK     | 0.419554 |
| TPD52L2   | 0.418995 |
| HRH1      | 0.418909 |
| IQCB1     | 0.418881 |
| UHRF1BP1L | 0.418643 |
| CHD9      | 0.418642 |
| NSF       | 0.418407 |
| KIAA0284  | 0.418343 |
| PPP4R1    | 0.418311 |
| ARMC1     | 0.417975 |
| B4GALT4   | 0.417931 |
| ZC3H13    | 0.417713 |
| PHIP      | 0.417649 |
| PEX26     | 0.41738  |
| DAZAP1    | 0.417341 |
| RC3H2     | 0.416668 |
| RAB22A    | 0.416295 |
| TUBGCP5   | 0.416064 |
| SIVA1     | 0.415994 |
| ASL       | 0.415382 |
| FIGN      | 0.415361 |
| USP16     | 0.414409 |
| UBE3C     | 0.413728 |
| ATP13A2   | 0.413375 |
| PSMD14    | 0.413072 |
| STAM2     | 0.412625 |
| GTPBP1    | 0.41244  |
| LNPEP     | 0.412421 |
| TRIM59    | 0.412278 |
| IER3IP1   | 0.412126 |

|              |          |
|--------------|----------|
| LUZP1        | 0.412107 |
| IGF2BP1      | 0.412062 |
| DRG1         | 0.411997 |
| SENP2        | 0.411849 |
| CNNM4        | 0.411768 |
| TLN2         | 0.41152  |
| KIAA0368     | 0.411253 |
| DOCK7        | 0.411066 |
| ELAC2        | 0.410924 |
| MTR          | 0.41091  |
| MIR632,ZNF20 | 0.410206 |
| ATP6V0B      | 0.410058 |
| CBX5,MIR3198 | 0.409892 |
| MIS18BP1     | 0.409501 |
| BUB3         | 0.40931  |
| GTPBP4       | 0.409259 |
| FNIP2        | 0.408787 |
| CDT1         | 0.408757 |
| HECTD1       | 0.40856  |
| CAP1         | 0.408388 |
| AGPAT9       | 0.407628 |
| DUS1L        | 0.407288 |
| ANKRD13A     | 0.407116 |
| NELF         | 0.406716 |
| CD44         | 0.406684 |
| CCDC93       | 0.406578 |
| TRRAP        | 0.40589  |
| GLRX3        | 0.405707 |
| FAM123B      | 0.405565 |
| RPL32,SNORA  | 0.405561 |
| DENND5A      | 0.405316 |
| RPL36        | 0.405032 |
| TSR1         | 0.405008 |
| EML4         | 0.404774 |
| IDE          | 0.404612 |
| UPF3B        | 0.404595 |
| AARSD1,PTGE  | 0.404463 |
| WDR43        | 0.404075 |
| PTPLAD1      | 0.403884 |
| TAF5L        | 0.403557 |

|             |          |
|-------------|----------|
| LRRC58      | 0.403489 |
| NAA10       | 0.402581 |
| ARHGEF11    | 0.402444 |
| ARFGAP1     | 0.402226 |
| UHMK1       | 0.402155 |
| QSOX2       | 0.402071 |
| TMX1        | 0.401886 |
| FRYL        | 0.401826 |
| GOT2        | 0.401758 |
| SVIL        | 0.400729 |
| TMED8       | 0.400672 |
| RPIA        | 0.400568 |
| NDUFA6      | 0.400519 |
| JARID2      | 0.400275 |
| GDI1        | 0.400238 |
| HSPG2       | 0.3997   |
| PPP1R12A    | 0.399132 |
| NBPF10      | 0.397905 |
| TJP1        | 0.397898 |
| VPRBP       | 0.39766  |
| MAPKBP1,MG/ | 0.396375 |
| SLC30A6     | 0.396242 |
| UBQLN1      | 0.395806 |
| MRPL3       | 0.395657 |
| AHSA1       | 0.395394 |
| MRPS10      | 0.395278 |
| TIMM50      | 0.39521  |
| MDFIC       | 0.394988 |
| TMEM64      | 0.39438  |
| RPTOR       | 0.394112 |
| EIF4EBP1    | 0.393467 |
| PRDX3       | 0.393187 |
| PPP1R14B    | 0.393149 |
| CHD1        | 0.392636 |
| BRPF3       | 0.392514 |
| C5orf22     | 0.392341 |
| ZNF281      | 0.392286 |
| USP37       | 0.391775 |
| SPEN        | 0.391524 |
| SMNDC1      | 0.390504 |

|              |          |
|--------------|----------|
| RALGAPB      | 0.390051 |
| MTIF2        | 0.389721 |
| WIPF1        | 0.389661 |
| CNTF,ZFP91,Z | 0.389559 |
| MRPS16       | 0.389009 |
| CCT8         | 0.38856  |
| MBNL1        | 0.388209 |
| BMS1         | 0.38819  |
| PM20D2       | 0.387963 |
| ZFR          | 0.387597 |
| MRPL37       | 0.387458 |
| PSMA1        | 0.387068 |
| SUZ12        | 0.387054 |
| CDK12        | 0.38693  |
| ZNF268       | 0.38684  |
| WDR75        | 0.386375 |
| GGH          | 0.386271 |
| PKIA         | 0.386263 |
| RPL7L1       | 0.38597  |
| CLPTM1L      | 0.385709 |
| IPO4         | 0.385495 |
| ERLIN1       | 0.385037 |
| SNX5         | 0.384705 |
| CHST11       | 0.384652 |
| UBN1         | 0.384628 |
| LETM1        | 0.384231 |
| CDC27        | 0.383948 |
| PCF11        | 0.383383 |
| ZDHHC5       | 0.382993 |
| NSUN2        | 0.382851 |
| ASCC2        | 0.382783 |
| CCT3         | 0.38277  |
| VOPP1        | 0.382542 |
| CAMSAP2      | 0.382487 |
| GLE1         | 0.381491 |
| SGCB         | 0.381444 |
| NBN          | 0.381064 |
| OTUD7B       | 0.379297 |
| ASXL2        | 0.379244 |
| SAP130       | 0.378994 |

|          |          |
|----------|----------|
| PDE12    | 0.378426 |
| CHTF18   | 0.378057 |
| AMMECR1L | 0.377879 |
| DDX50    | 0.377416 |
| OTUD4    | 0.377368 |
| CPSF7    | 0.377164 |
| CTNBL1   | 0.376025 |
| U2AF2    | 0.375139 |
| USP12    | 0.374934 |
| TMED9    | 0.37377  |
| E2F1     | 0.373058 |
| DNAJA3   | 0.37205  |
| EPRS     | 0.371386 |
| GYS1     | 0.371109 |
| SLC29A1  | 0.358972 |

(K) Genes significantly downregulated by sh-ZNF498

| Gene list | log2-fold-change |
|-----------|------------------|
| HIST1H2AM | -2.16694         |
| SHISA3    | -2.05237         |
| RN7SK     | -2.01549         |
| CHCHD3    | -1.91745         |
| CXCR4     | -1.69744         |
| ANKRD1    | -1.59602         |
| ANGPTL4   | -1.58732         |
| RN7SL1    | -1.33026         |
| MAGEB2    | -1.26996         |
| NTSR1     | -1.21184         |
| RASEF     | -1.17438         |
| GBP1      | -1.16422         |
| DCAF12L1  | -1.15836         |
| CREBL2    | -1.14416         |
| ZNF204P   | -1.0992          |
| FKBP7     | -1.09365         |
| TM4SF18   | -1.08337         |
| IL1R2     | -1.06574         |
| FOS       | -1.06105         |
| LINC00669 | -1.04156         |
| ARHGAP24  | -0.961295        |
| EGR1      | -0.950549        |

|           |           |
|-----------|-----------|
| PHLDA2    | -0.92178  |
| SLC47A1   | -0.902915 |
| ETV1      | -0.881212 |
| SNHG10    | -0.879757 |
| SYK       | -0.87451  |
| EGLN3     | -0.865182 |
| STC1      | -0.852568 |
| KCNS3     | -0.846397 |
| EMP2      | -0.846199 |
| TEX19     | -0.843125 |
| SYT7      | -0.837023 |
| MED29     | -0.825075 |
| CAMK2B    | -0.823695 |
| SPP1      | -0.822315 |
| MAL       | -0.812043 |
| PAIP2B    | -0.802957 |
| C14orf132 | -0.796236 |
| NRGN      | -0.783537 |
| CADM1     | -0.78352  |
| SEC11C    | -0.775276 |
| ECSCR     | -0.741465 |
| POLR2L    | -0.733148 |
| PNMT      | -0.732519 |
| HEG1      | -0.732338 |
| TTC9C     | -0.726298 |
| LCN2      | -0.719659 |
| AP1S3     | -0.711726 |
| KIAA1737  | -0.708209 |
| SLPI      | -0.698145 |
| G0S2      | -0.696503 |
| ANO6      | -0.692066 |
| FOSL1     | -0.674565 |
| PRPF4     | -0.662694 |
| COX8A     | -0.656529 |
| MMP1      | -0.6513   |
| SLC25A24  | -0.650715 |
| SETD7     | -0.639381 |
| DCAF11    | -0.636699 |
| EPS8      | -0.627233 |
| ABCA3     | -0.603971 |

|              |           |
|--------------|-----------|
| MXRA5        | -0.600632 |
| LSR          | -0.599152 |
| PPIA         | -0.593158 |
| COX5B        | -0.592055 |
| ANXA4        | -0.574611 |
| EPAS1        | -0.562457 |
| MIR3610,RAD2 | -0.552964 |
| MIF          | -0.527916 |
| SUPT16H      | -0.525799 |

(L) Genes significantly upregulated by sh-ZNF498

Gene list            log2-fold-change

|                      |         |
|----------------------|---------|
| COL6A3               | 2.77051 |
| KCNJ15               | 2.399   |
| BGN                  | 2.37943 |
| TIE1                 | 2.20542 |
| LOC100507420         | 2.03697 |
| GNGT2                | 1.79258 |
| COL5A1               | 1.68537 |
| GDF6                 | 1.64616 |
| FOXS1                | 1.64002 |
| SCEL                 | 1.56914 |
| CYP24A1              | 1.5257  |
| MAP7D2               | 1.49449 |
| WDR69                | 1.47076 |
| OSCAR                | 1.45889 |
| MCAM                 | 1.41312 |
| LOC100506371         | 1.39354 |
| COL1A1               | 1.38455 |
| RASGRP3              | 1.3818  |
| KRT81                | 1.37802 |
| MYO7B                | 1.37137 |
| SLC22A2              | 1.36651 |
| PI16                 | 1.32759 |
| SYT11                | 1.31392 |
| TLL2                 | 1.29443 |
| GPR17                | 1.27762 |
| ANXA8L1,LOC100506371 | 1.27716 |
| EFEMP1               | 1.25891 |
| ZNF365               | 1.23297 |

|           |          |
|-----------|----------|
| SERPINE1  | 1.22874  |
| AQP3      | 1.2215   |
| ACTBL2    | 1.22045  |
| FAM198B   | 1.20148  |
| LPAR5     | 1.16814  |
| DOCK2     | 1.15713  |
| HHIP      | 1.14513  |
| HS3ST3B1  | 1.14499  |
| PLVAP     | 1.11854  |
| SIK1      | 1.11086  |
| AOX1      | 1.10356  |
| SPOCK1    | 1.0927   |
| GPR132    | 1.08908  |
| ADAMTS5   | 1.07681  |
| RBP1      | 1.07667  |
| HECW1     | 1.06787  |
| DCLK2     | 1.06751  |
| PPARGC1A  | 1.05282  |
| KRT17     | 1.04449  |
| NOTCH3    | 1.02057  |
| PTPRR     | 1.01797  |
| NMRK2     | 1.00848  |
| PLCB2     | 1.00835  |
| UNC13D    | 1.00485  |
| LINC00319 | 0.988494 |
| FAM83A    | 0.984955 |
| MMP13     | 0.971286 |
| SLIT3     | 0.963049 |
| ATP10A    | 0.95897  |
| C1orf116  | 0.95752  |
| PPYR1     | 0.948986 |
| SLCO2B1   | 0.942544 |
| FBN1      | 0.932593 |
| AMTN      | 0.911167 |
| LMCD1     | 0.909057 |
| NKAIN4    | 0.901061 |
| MATN3     | 0.869076 |
| HSPG2     | 0.8681   |
| MMP2      | 0.865732 |
| SERPINB5  | 0.865418 |



|          |          |
|----------|----------|
| DCHS1    | 0.860875 |
| CCDC80   | 0.860532 |
| MYOM3    | 0.852049 |
| CPAMD8   | 0.851207 |
| SYTL1    | 0.839517 |
| PRUNE2   | 0.831227 |
| HPGD     | 0.823411 |
| ALS2CL   | 0.79454  |
| LRP1     | 0.784859 |
| MAP1A    | 0.77249  |
| ADTRP    | 0.768929 |
| SEMA7A   | 0.764794 |
| ANPEP    | 0.758536 |
| TGFBI    | 0.751422 |
| ZNF853   | 0.750765 |
| N4BP2    | 0.742642 |
| DKK1     | 0.736297 |
| CLDN16   | 0.735118 |
| AHNAK2   | 0.726242 |
| PGM2L1   | 0.717799 |
| MMRN2    | 0.717363 |
| BMF      | 0.691095 |
| IGDCC4   | 0.690101 |
| ITGA4    | 0.683153 |
| COL4A2   | 0.682978 |
| RASSF2   | 0.674403 |
| TLN2     | 0.670978 |
| TNS1     | 0.663364 |
| MAP2     | 0.658048 |
| THBS1    | 0.655575 |
| ARHGEF40 | 0.651883 |
| ABLIM3   | 0.649594 |
| NID1     | 0.648765 |
| TANC2    | 0.648097 |
| TGM2     | 0.637647 |
| DKK3     | 0.637596 |
| NAV1     | 0.623766 |
| CAMKK1   | 0.619115 |
| MSMO1    | 0.594457 |
| NDST1    | 0.59336  |

|        |          |
|--------|----------|
| CAPN5  | 0.576521 |
| BMP1   | 0.574716 |
| GSN    | 0.570054 |
| SACS   | 0.558792 |
| CLIP4  | 0.552412 |
| PLXND1 | 0.545515 |
| HMGCS1 | 0.543246 |
| MICAL2 | 0.534226 |
| AKAP12 | 0.530934 |

Supplementary Table S3; GSEA analysis about TGF- $\beta$ , Wnt and Notch pathway  
 Orange shadow indicates ES positive and FDR q val < 0.25.  
 Light green shadow indicates ES negative and FDR q val < 0.25.

a) Analysis about TGF- $\beta$  pathway.

| NAME                                                             | MSL3        |             | ZNF691      |            | VPS45       |             |
|------------------------------------------------------------------|-------------|-------------|-------------|------------|-------------|-------------|
|                                                                  | ES          | FDR q-val   | ES          | FDR q-val  | ES          | FDR q-val   |
| BIOCARTA_TGFB_PATHWAY                                            | 0.5403811   | 0.27684477  | 0.477841    | 0.72657055 | -0.22978772 | 0.9995102   |
| COULOUARN_TEMPORAL_TGFB1_SIGNATURE_UP                            | 0.3615901   | 0.32034245  | -0.33831945 | 0.96670735 | 0.27652997  | 0.67668533  |
| GSE39820_CTRL_VS_TGFBETA1_IL6_CD4_TCELL_DN                       | 0.30992135  | 0.44028     | -0.27730408 | 0.8447982  | -0.3285302  | 0.50310874  |
| GSE39820_CTRL_VS_TGFBETA1_IL6_IL23A_CD4_TCELL_DN                 | 0.32284978  | 0.3868936   | -0.31539893 | 0.9189054  | -0.22362721 | 1           |
| GSE39820_CTRL_VS_TGFBETA3_IL6_CD4_TCELL_UP                       | -0.26472372 | 1           | -0.23603275 | 0.97765905 | 0.27740258  | 0.6680788   |
| GSE39820_CTRL_VS_TGFBETA3_IL6_IL23A_CD4_TCELL_UP                 | -0.30995017 | 1           | -0.20855479 | 1          | 0.3504764   | 0.43230367  |
| GSE39820_TGFBETA1_IL6_VS_TGFBETA1_IL6_IL23A_TREATED_CD4_TCELL_UP | 0.40121773  | 0.085057825 | 0.21942785  | 1          | -0.20159996 | 1           |
| GSE39820_TGFBETA1_VS_TGFBETA3_IN_IL6_IL23A_TREATED_CD4_TCELL_UP  | 0.27733058  | 0.64752054  | -0.28941548 | 0.8443031  | 0.27025402  | 0.6085698   |
| GSE39820_TGFBETA1_VS_TGFBETA3_IN_IL6_TREATED_CD4_TCELL_UP        | 0.3094584   | 0.43635628  | 0.3344197   | 0.84029394 | 0.28738606  | 0.69111854  |
| GSE39820_TGFBETA3_IL6_VS_TGFBETA3_IL6_IL23A_TREATED_CD4_TCELL_UP | 0.33542925  | 0.3217461   | -0.28736314 | 0.8834223  | -0.3110829  | 0.6088518   |
| GSE7460_CTRL_VS_TGFB_TREATED_ACT_CD8_TCELL_UP                    | 0.3582939   | 0.20473683  | -0.24276055 | 0.96914697 | 0.27951345  | 0.6511039   |
| GSE7460_CTRL_VS_TGFB_TREATED_ACT_FOXP3_HET_TCONV_UP              | -0.26859745 | 1           | 0.24731466  | 1          | 0.3113479   | 0.44940132  |
| GSE7460_CTRL_VS_TGFB_TREATED_ACT_FOXP3_MUT_TCONV_UP              | 0.31357145  | 0.42904115  | 0.24479547  | 1          | -0.34051073 | 0.547993    |
| GSE7460_CTRL_VS_TGFB_TREATED_ACT_TCONV_UP                        | 0.2702862   | 0.6862889   | -0.2915909  | 0.8811646  | -0.24313158 | 0.94089633  |
| GSE7460_CTRL_VS_TGFB_TREATED_ACT_TREG_UP                         | -0.23057917 | 0.94030744  | 0.22740935  | 1          | 0.3589767   | 0.8185762   |
| GSE7460_FOXP3_MUT_VS_WT_ACT_WITH_TGFB_TCONV_UP                   | 0.2656412   | 0.691557    | -0.35949907 | 0.694746   | -0.27796456 | 0.82515514  |
| GSE7460_TREG_VS_TCONV_ACT_WITH_TGFB_UP                           | -0.23324488 | 1           | -0.3232621  | 1          | -0.2512833  | 0.9600649   |
| GSE7460_WT_VS_FOXP3_HET_ACT_WITH_TGFB_TCONV_UP                   | 0.36845735  | 0.19962642  | -0.284465   | 0.8542935  | -0.28789485 | 0.79496974  |
| HALLMARK_TGF_BETA_SIGNALING                                      | 0.5689209   | 0.011948913 | 0.3137297   | 1          | -0.35475713 | 0.64365995  |
| JAZAG_TGFB1_SIGNALING_UP                                         | -0.2455987  | 0.89352214  | 0.27858344  | 1          | 0.36946192  | 0.34684515  |
| JAZAG_TGFB1_SIGNALING_VIA_SMAD4_UP                               | 0.37647521  | 0.26503608  | 0.26604137  | 1          | -0.3369867  | 0.6172237   |
| KARAKAS_TGFB1_SIGNALING                                          | 0.6831599   | 0.030115526 | 0.39972362  | 1          | 0.4139961   | 0.64510536  |
| KARLSSON_TGFB1_TARGETS_UP                                        | 0.34089252  | 0.37636     | 0.22460715  | 1          | 0.3462242   | 0.4669323   |
| KEGG_TGF_BETA_SIGNALING_PATHWAY                                  | 0.5402862   | 0.014567942 | 0.37790832  | 0.97032684 | -0.4087919  | 0.36949003  |
| LABBE_TARGETS_OF_TGFB1_AND_WNT3A_UP                              | 0.4382159   | 0.07989972  | -0.43711746 | 0.33164203 | -0.45161828 | 0.10913716  |
| LABBE_TGFB1_TARGETS_UP                                           | 0.3547772   | 0.3511142   | -0.33854786 | 0.8153721  | -0.36835358 | 0.52013934  |
| MCBRYAN_PUBERTAL_TGFB1_TARGETS_UP                                | 0.4408747   | 0.0507683   | 0.2812999   | 0.99237025 | -0.34967306 | 0.54542977  |
| PID_TGFB1_PATHWAY                                                | 0.55508965  | 0.022571694 | 0.390575    | 0.6208283  | 0.2572577   | 0.9277079   |
| PLASARI_TGFB1_SIGNALING_VIA_NFIC_10HR_UP                         | 0.3021211   | 0.76678586  | -0.40769216 | 0.9942093  | -0.4284113  | 0.4634889   |
| PLASARI_TGFB1_SIGNALING_VIA_NFIC_1HR_UP                          | 0.5095106   | 0.12169546  | 0.5175032   | 0.5452426  | -0.53674126 | 0.13614236  |
| PLASARI_TGFB1_TARGETS_10HR_UP                                    | 0.44301108  | 0.03098119  | -0.46609718 | 0.12422489 | -0.47141936 | 0.030542627 |
| PLASARI_TGFB1_TARGETS_1HR_UP                                     | 0.4215751   | 0.36143988  | -0.5522924  | 0.22344385 | -0.6597626  | 0.015069796 |
| REACTOME_DOWNREGULATION_OF_TGF_BETA_RECEPTOR_SIGNALING           | 0.4073083   | 0.6340184   | -0.27393168 | 0.9914002  | 0.41068345  | 0.6402698   |
| REACTOME_SIGNALING_BY_TGF_BETA_RECEPTOR_COMPLEX                  | 0.32258034  | 0.6779398   | -0.2891549  | 0.9509344  | 0.35954398  | 0.500554    |
| REACTOME_TGF_BETA_RECEPTOR_SIGNALING_ACTIVATES_SMADS             | 0.42707115  | 0.4869164   | 0.27592072  | 1          | 0.39654353  | 0.5923773   |
| TGFB_UP.V1_UP                                                    | 0.42301112  | 0.04976303  | -0.294912   | 0.8568111  | -0.35369998 | 0.47671142  |
| TRANSFORMING_GROWTH_FACTOR_BETA_RECEPTOR_SIGNALING_PATHWAY       | 0.5248387   | 0.08648107  | 0.30031395  | 1          | -0.4323284  | 0.55539924  |
| VERRECCHIA_DELAYED_RESPONSE_TO_TGFB1                             | 0.53273493  | 0.058297176 | 0.3468315   | 1          | -0.47941568 | 0.301777    |
| VERRECCHIA_EARLY_RESPONSE_TO_TGFB1                               | 0.680585    | 0           | 0.3653835   | 0.6790151  | -0.46614    | 0.27915487  |
| VERRECCHIA_RESPONSE_TO_TGFB1_C1                                  | 0.65099365  | 0.027478533 | 0.28340515  | 0.98314774 | -0.37731293 | 0.9431669   |
| VERRECCHIA_RESPONSE_TO_TGFB1_C2                                  | 0.6977464   | 0.010430511 | 0.45462587  | 0.69029784 | -0.62633795 | 0.087673545 |

| NAME                                                             | 0.47096065  | 0.36216813 | 0.39869124  | 1           | -0.4671716  | 0.48957118  |
|------------------------------------------------------------------|-------------|------------|-------------|-------------|-------------|-------------|
|                                                                  | ITGB3BP     |            | TLE2        |             | ZNF498      |             |
|                                                                  | ES          | FDR q-val  | ES          | FDR q-val   | ES          | FDR q-val   |
| BIOCARTA_TGFB_PATHWAY                                            | 0.3634821   | 0.97032285 | 0.3076893   | 0.9821319   | 0.6819432   | 0.05775441  |
| COULOUARN_TEMPORAL_TGFB1_SIGNATURE_UP                            | -0.3294671  | 0.64927965 | 0.31608036  | 0.55799353  | 0.4652232   | 0.09590269  |
| GSE39820_CTRL_VS_TGFBETA1_IL6_CD4_TCELL_UP                       | 0.25801522  | 0.95647043 | 0.33983153  | 0.2996092   | -0.28432623 | 0.7718209   |
| GSE39820_CTRL_VS_TGFBETA1_IL6_IL23A_CD4_TCELL_UP                 | 0.292941    | 0.8255734  | 0.47263452  | 0.017686283 | 0.32437637  | 0.42068172  |
| GSE39820_CTRL_VS_TGFBETA3_IL6_CD4_TCELL_UP                       | -0.3185336  | 0.82406175 | 0.46404117  | 0.01659165  | -0.3416211  | 0.57380825  |
| GSE39820_CTRL_VS_TGFBETA3_IL6_IL23A_CD4_TCELL_UP                 | 0.32210213  | 0.62935543 | 0.5343883   | 5.00E-04    | 0.25923178  | 0.8512007   |
| GSE39820_TGFBETA1_IL6_VS_TGFBETA1_IL6_IL23A_TREATED_CD4_TCELL_UP | 0.24454567  | 0.9676859  | 0.33144516  | 0.34533182  | 0.37981126  | 0.15502831  |
| GSE39820_TGFBETA1_VS_TGFBETA3_IN_IL6_IL23A_TREATED_CD4_TCELL_UP  | -0.24598199 | 0.9852032  | 0.28149623  | 0.5647332   | -0.2555241  | 0.917931    |
| GSE39820_TGFBETA1_VS_TGFBETA3_IN_IL6_TREATED_CD4_TCELL_UP        | 0.213852    | 1          | 0.43592358  | 0.034901656 | 0.42810524  | 0.08614361  |
| GSE39820_TGFBETA3_IL6_VS_TGFBETA3_IL6_IL23A_TREATED_CD4_TCELL_UP | 0.3237918   | 0.65904444 | 0.33362776  | 0.35282886  | 0.36047873  | 0.19789575  |
| GSE7460_CTRL_VS_TGFB_TREATED_ACT_CD8_TCELL_UP                    | -0.36676624 | 0.6344128  | 0.31455034  | 0.46008578  | -0.322133   | 0.58842826  |
| GSE7460_CTRL_VS_TGFB_TREATED_ACT_FOXP3_HET_TCONV_UP              | -0.31016278 | 0.6816038  | 0.30922383  | 0.4738329   | 0.24007162  | 0.9116174   |
| GSE7460_CTRL_VS_TGFB_TREATED_ACT_FOXP3_MUT_TCONV_UP              | 0.25961122  | 0.98178965 | -0.33996123 | 0.6843642   | 0.305904    | 0.50106984  |
| GSE7460_CTRL_VS_TGFB_TREATED_ACT_TCONV_UP                        | 0.34813124  | 0.66560674 | -0.24823833 | 1           | 0.26975438  | 0.76914936  |
| GSE7460_CTRL_VS_TGFB_TREATED_ACT_TREG_UP                         | -0.32161823 | 0.8131395  | 0.55373436  | 0           | -0.24065024 | 0.9708549   |
| GSE7460_FOXP3_MUT_VS_WT_ACT_WITH_TGFB_TCONV_UP                   | -0.2544812  | 0.9530237  | 0.3412039   | 0.31689003  | 0.26701543  | 0.80276597  |
| GSE7460_TREG_VS_TCONV_ACT_WITH_TGFB_UP                           | 0.36865616  | 0.5848241  | 0.30801085  | 0.5100858   | 0.3113688   | 0.49870822  |
| GSE7460_WT_VS_FOXP3_HET_ACT_WITH_TGFB_TCONV_UP                   | 0.3498785   | 0.5756246  | -0.33336717 | 0.6615155   | 0.28175047  | 0.6712838   |
| HALLMARK_TGF_BETA_SIGNALING                                      | -0.4117195  | 0.641973   | 0.32887632  | 0.58483905  | 0.5447834   | 0.058139697 |
| JAZAG_TGFB1_SIGNALING_UP                                         | -0.28349963 | 0.9343974  | 0.30801827  | 0.56399053  | -0.2852892  | 0.88177514  |
| JAZAG_TGFB1_SIGNALING_VIA_SMAD4_UP                               | -0.30443823 | 0.94596034 | -0.36042345 | 0.656004    | -0.37233016 | 0.59089905  |
| KARAKAS_TGFB1_SIGNALING                                          | -0.47396865 | 0.6890506  | 0.43466264  | 0.57321614  | 0.623503    | 0.11126467  |
| KARLSSON_TGFB1_TARGETS_UP                                        | -0.4227017  | 1          | 0.66039264  | 0           | 0.3428562   | 0.43332914  |
| KEGG_TGF_BETA_SIGNALING_PATHWAY                                  | 0.37419665  | 0.6188694  | -0.35591006 | 0.72949165  | 0.33452576  | 0.50426424  |
| LABBE_TARGETS_OF_TGFB1_AND_WNT3A_UP                              | 0.3360171   | 0.6841063  | -0.33232063 | 0.7588593   | 0.44040895  | 0.087277785 |
| LABBE_TGFB1_TARGETS_UP                                           | 0.4061855   | 0.60446846 | -0.3342732  | 0.7785406   | -0.30784485 | 0.74184275  |
| MCBRYAN_PUBERTAL_TGFB1_TARGETS_UP                                | 0.29370376  | 0.8032177  | 0.34772587  | 0.32136998  | 0.37845734  | 0.16579674  |
| PID_TGFB1_PATHWAY                                                | -0.27132845 | 0.9813654  | -0.26327148 | 0.98243815  | 0.4684817   | 0.13417935  |
| PLASARI_TGFB1_SIGNALING_VIA_NFIC_10HR_UP                         | 0.51319534  | 0.61817986 | -0.3469239  | 0.8435724   | 0.343913    | 0.6714268   |
| PLASARI_TGFB1_SIGNALING_VIA_NFIC_1HR_UP                          | 0.52053183  | 0.4747472  | -0.37658462 | 0.8290475   | 0.53078496  | 0.113472074 |
| PLASARI_TGFB1_TARGETS_10HR_UP                                    | 0.36331707  | 0.5584864  | 0.41230324  | 0.052621383 | 0.37998188  | 0.14497031  |
| PLASARI_TGFB1_TARGETS_1HR_UP                                     | -0.43555084 | 0.66914535 | 0.3678949   | 0.5815973   | -0.35824394 | 0.7319573   |
| REACTOME_DOWNREGULATION_OF_TGF_BETA_RECEPTOR_SIGNALING           | -0.4485863  | 0.6269628  | 0.42296308  | 0.5996832   | 0.30755353  | 0.9804657   |
| REACTOME_SIGNALING_BY_TGF_BETA_RECEPTOR_COMPLEX                  | -0.37480965 | 0.7314499  | 0.37056383  | 0.4460543   | 0.40275094  | 0.26420766  |
| REACTOME_TGF_BETA_RECEPTOR_SIGNALING_ACTIVATES_SMADS             | -0.41608867 | 0.78579754 | 0.43724316  | 0.5903038   | 0.36458406  | 0.8662023   |
| TGFB_UP.V1_UP                                                    | 0.27387977  | 0.86086863 | 0.45138234  | 0.02333683  | 0.46689788  | 0.054184854 |
| TRANSFORMING_GROWTH_FACTOR_BETA_RECEPTOR_SIGNALING_PATHWAY       | -0.26756954 | 0.98312867 | -0.29615748 | 0.9955149   | 0.44353488  | 0.2601834   |
| VERRECCHIA_DELAYED_RESPONSE_TO_TGFB1                             | -0.29438713 | 0.99316424 | -0.34848958 | 0.8396581   | 0.51661384  | 0.10322032  |
| VERRECCHIA_EARLY_RESPONSE_TO_TGFB1                               | 0.3212285   | 0.8898317  | 0.33978623  | 0.58131456  | 0.60393035  | 0.032853488 |
| VERRECCHIA_RESPONSE_TO_TGFB1_C1                                  | -0.3870836  | 0.9670639  | -0.3522351  | 0.9907619   | 0.6903008   | 0.07760037  |
| VERRECCHIA_RESPONSE_TO_TGFB1_C2                                  | 0.42676243  | 0.7853702  | 0.4130634   | 0.5761999   | 0.585087    | 0.09673534  |
| VERRECCHIA_RESPONSE_TO_TGFB1_C5                                  | -0.4070195  | 0.9782493  | -0.39387766 | 0.85692155  | 0.59533983  | 0.09301672  |

b) Analysis about Wnt pathway.

| NAME                                | MSL3        |             | ZNF691      |             | VPS45       |            |
|-------------------------------------|-------------|-------------|-------------|-------------|-------------|------------|
|                                     | ES          | FDR q-val   | ES          | FDR q-val   | ES          | FDR q-val  |
| BIOCARTA_WNT_PATHWAY                | 0.50068516  | 0.24726693  | 0.40559503  | 0.55800956  | 0.26494917  | 0.9658848  |
| HALLMARK_WNT_BETA_CATENIN_SIGNALING | 0.40808997  | 0.32803485  | 0.50642127  | 0.19558854  | 0.30884558  | 1          |
| KEGG_WNT_SIGNALING_PATHWAY          | 0.35161358  | 0.21859159  | 0.29515782  | 0.5391811   | -0.22248736 | 1          |
| LABBE_TARGETS_OF_TGFB1_AND_WNT3A_UP | 0.4382159   | 0.16877232  | -0.43711746 | 0.10804182  | -0.45161828 | 0.2764436  |
| LABBE_WNT3A_TARGETS_UP              | 0.38479647  | 0.26081967  | 0.26193935  | 0.7111867   | -0.3869322  | 0.50717163 |
| MORF_WNT1                           | 0.29834503  | 0.5672574   | -0.30149165 | 0.53103656  | -0.36487234 | 0.58450246 |
| PID_BETA_CATENIN_DEG_PATHWAY        | 0.53747255  | 0.21090178  | 0.47184977  | 0.4739237   | 0.3335619   | 0.95564145 |
| PID_BETA_CATENIN_NUC_PATHWAY        | 0.45907766  | 0.15456228  | 0.29220486  | 0.61563593  | -0.33250704 | 0.78693783 |
| PID_WNT_CANONICAL_PATHWAY           | 0.27568805  | 0.9761062   | -0.46176985 | 0.34014586  | 0.52560806  | 0.4529787  |
| PID_WNT_NONCANONICAL_PATHWAY        | 0.39986426  | 0.42729422  | 0.32675785  | 0.6661658   | -0.21913823 | 0.99517626 |
| PID_WNT_SIGNALING_PATHWAY           | 0.53348315  | 0.14695922  | 0.4910206   | 0.31809035  | -0.30748686 | 1          |
| REACTOME_SIGNALING_BY_WNT           | -0.24062428 | 0.91663986  | 0.3499914   | 0.45545292  | 0.40496498  | 0.2813934  |
| SANSOM_WNT_PATHWAY_REQUIRE_MYC      | 0.6148553   | 0.002785715 | 0.5707256   | 0.008452381 | 0.31654623  | 1          |
| ST_WNT_BETA_CATENIN_PATHWAY         | 0.54881716  | 0.24948101  | 0.44606385  | 0.47015122  | -0.27723423 | 1          |
| ST_WNT_CA2_CYCLIC_GMP_PATHWAY       | 0.5121965   | 0.22752231  | 0.3837594   | 0.56898904  | -0.5685028  | 0.3297095  |
| WILLERT_WNT_SIGNALING               | 0.46251318  | 0.32940158  | 0.45677087  | 0.48588544  | 0.33245826  | 1          |
| WNT_SIGNALING                       | 0.42880502  | 0.14114054  | 0.38952115  | 0.31522733  | -0.30351186 | 0.85607326 |
| WNT_UP.V1_UP                        | -0.32198775 | 0.5471007   | -0.41968238 | 0.21307546  | -0.26259094 | 0.9369174  |

| NAME                                | ITGB3BP     |             | TLE2        |            | ZNF498      |             |
|-------------------------------------|-------------|-------------|-------------|------------|-------------|-------------|
|                                     | ES          | FDR q-val   | ES          | FDR q-val  | ES          | FDR q-val   |
| BIOCARTA_WNT_PATHWAY                | 0.27822173  | 1           | 0.43097696  | 0.39346018 | -0.30131975 | 1           |
| HALLMARK_WNT_BETA_CATENIN_SIGNALING | 0.33701003  | 0.9373706   | -0.32584423 | 0.99249893 | -0.230408   | 0.9891348   |
| KEGG_WNT_SIGNALING_PATHWAY          | 0.34628886  | 0.67934775  | -0.3134428  | 0.9966895  | 0.28381112  | 0.649148    |
| LABBE_TARGETS_OF_TGFB1_AND_WNT3A_UP | 0.3360171   | 0.7487376   | -0.33232063 | 1          | 0.44040895  | 0.46758547  |
| LABBE_WNT3A_TARGETS_UP              | -0.27526447 | 0.733577    | 0.3471952   | 0.45359927 | 0.2913364   | 0.7125552   |
| MORF_WNT1                           | 0.3666987   | 0.75224817  | 0.3254184   | 0.366024   | 0.41090497  | 0.47075042  |
| PID_BETA_CATENIN_DEG_PATHWAY        | 0.30222023  | 0.97779393  | -0.34343016 | 0.9316789  | 0.48040065  | 0.7929425   |
| PID_BETA_CATENIN_NUC_PATHWAY        | -0.3441435  | 0.48604485  | 0.2898411   | 0.67021835 | 0.34396508  | 0.693355    |
| PID_WNT_CANONICAL_PATHWAY           | 0.42281795  | 0.97160846  | -0.34575558 | 0.95642847 | 0.44357908  | 0.5533377   |
| PID_WNT_NONCANONICAL_PATHWAY        | -0.4309962  | 0.475984    | -0.32898748 | 1          | 0.39542663  | 0.6090444   |
| PID_WNT_SIGNALING_PATHWAY           | 0.53490955  | 0.28163618  | -0.36698306 | 1          | 0.49111214  | 0.4959272   |
| REACTOME_SIGNALING_BY_WNT           | -0.5146342  | 0.060307786 | 0.5178634   | 0.07184874 | -0.5555216  | 0.032171216 |
| SANSOM_WNT_PATHWAY_REQUIRE_MYC      | 0.5596827   | 0.06555607  | 0.43950275  | 0.2566964  | 0.2893307   | 0.8059861   |
| ST_WNT_BETA_CATENIN_PATHWAY         | 0.32397312  | 1           | 0.41881448  | 0.4143618  | 0.4130237   | 0.7180088   |
| ST_WNT_CA2_CYCLIC_GMP_PATHWAY       | 0.360774    | 1           | -0.54701483 | 0.38358778 | -0.48733875 | 0.5493748   |
| WILLERT_WNT_SIGNALING               | 0.33959723  | 0.9845459   | -0.37513247 | 1          | -0.3282184  | 1           |
| WNT_SIGNALING                       | 0.36339325  | 0.6808366   | -0.28896946 | 1          | -0.30583572 | 0.89029896  |
| WNT_UP.V1_UP                        | 0.29095387  | 0.89968854  | -0.3841682  | 0.38784072 | -0.3956567  | 0.27318844  |

c) Analysis about Notch pathway.

| NAME                         | MSL3       |            | ZNF691      |           | VPS45       |           |
|------------------------------|------------|------------|-------------|-----------|-------------|-----------|
|                              | ES         | FDR q-val  | ES          | FDR q-val | ES          | FDR q-val |
| HALLMARK_NOTCH_SIGNALING     | 0.39970455 | 0.50415075 | -0.30722243 | 1         | 0.30123582  | 1         |
| KEGG_NOTCH_SIGNALING_PATHWAY | 0.33367792 | 0.5833455  | -0.32325235 | 1         | 0.32301956  | 1         |
| NGUYEN_NOTCH1_TARGETS_UP     | 0.5123029  | 0.38856462 | 0.36748326  | 0.7100778 | -0.45039618 | 1         |

|                                                              |             |            |             |            |             |            |
|--------------------------------------------------------------|-------------|------------|-------------|------------|-------------|------------|
| NOTCH_DN.V1_UP                                               | 0.33975208  | 0.42480552 | -0.3767208  | 0.5930178  | -0.2829439  | 0.60900193 |
| PID_NOTCH_PATHWAY                                            | 0.5386918   | 0.07561037 | -0.28863004 | 1          | -0.34330997 | 0.7099428  |
| REACTOME_ACTIVATED_NOTCH1_TRANSMITS_SIGNAL_TO_THE_NUCLEUS    | 0.45448053  | 0.41499186 | -0.41958913 | 0.89529645 | -0.4239685  | 0.75111973 |
| REACTOME_NOTCH1_INTRACELLULAR_DOMAIN_REGULATES_TRANSCRIPTION | 0.41603547  | 0.45211473 | -0.26974142 | 0.9276956  | -0.26309404 | 0.92541456 |
| REACTOME_PRE_NOTCH_EXPRESSION_AND_PROCESSING                 | 0.38369974  | 0.5329762  | 0.3677576   | 0.96959716 | 0.27121586  | 1          |
| REACTOME_PRE_NOTCH_TRANSCRIPTION_AND_TRANSLATION             | 0.33194354  | 0.80433846 | 0.30659425  | 0.86089814 | 0.25901774  | 0.9667589  |
| REACTOME_SIGNALING_BY_NOTCH                                  | 0.39099094  | 0.3189336  | -0.24855095 | 0.94373643 | -0.24031445 | 0.97611856 |
| REACTOME_SIGNALING_BY_NOTCH1                                 | 0.42522132  | 0.33775452 | -0.32079116 | 1          | -0.32878363 | 0.67414916 |
| VILIMAS_NOTCH1_TARGETS_UP                                    | 0.34052703  | 0.56567496 | -0.5524359  | 0.10098593 | -0.50375295 | 0.32342023 |
|                                                              | ITGB3BP     |            | TLE2        |            | ZNF498      |            |
| NAME                                                         | ES          | FDR q-val  | ES          | FDR q-val  | ES          | FDR q-val  |
| HALLMARK_NOTCH_SIGNALING                                     | 0.31935933  | 0.83030385 | -0.37403646 | 0.80402285 | 0.31743002  | 1          |
| KEGG_NOTCH_SIGNALING_PATHWAY                                 | -0.26978302 | 0.93780166 | -0.3590205  | 0.71470046 | 0.38923326  | 0.72365975 |
| NGUYEN_NOTCH1_TARGETS_UP                                     | -0.5192529  | 0.9038287  | 0.47246212  | 0.3763515  | 0.50879115  | 0.5752291  |
| NOTCH_DN.V1_UP                                               | -0.31945366 | 0.71928084 | -0.4105551  | 0.25005195 | 0.2687823   | 1          |
| PID_NOTCH_PATHWAY                                            | 0.3203501   | 0.75950414 | -0.28769416 | 0.8827379  | 0.2561195   | 1          |
| REACTOME_ACTIVATED_NOTCH1_TRANSMITS_SIGNAL_TO_THE_NUCLEUS    | -0.4180081  | 0.6673923  | -0.5864395  | 0.19252507 | -0.43735707 | 1          |
| REACTOME_NOTCH1_INTRACELLULAR_DOMAIN_REGULATES_TRANSCRIPTION | -0.2877716  | 1          | -0.3255602  | 0.81797713 | -0.28467304 | 0.8769092  |
| REACTOME_PRE_NOTCH_EXPRESSION_AND_PROCESSING                 | 0.41334668  | 0.4481293  | 0.3826046   | 0.46158862 | 0.41669214  | 0.7750863  |
| REACTOME_PRE_NOTCH_TRANSCRIPTION_AND_TRANSLATION             | 0.50632274  | 0.34445304 | 0.53116864  | 0.3348121  | 0.46344584  | 0.8325777  |
| REACTOME_SIGNALING_BY_NOTCH                                  | -0.2466072  | 1          | -0.33128053 | 0.8068371  | 0.27011403  | 1          |
| REACTOME_SIGNALING_BY_NOTCH1                                 | -0.30381203 | 1          | -0.42900053 | 0.3763364  | -0.27893782 | 1          |
| VILIMAS_NOTCH1_TARGETS_UP                                    | 0.4883157   | 0.29421756 | -0.5600983  | 0.13145483 | -0.36271894 | 0.72057426 |

Supplementary Table S4: Primer list that is used in this research

Subcloning at shRNA screen

Forward primer ATCTCGACGGTATCGATGGCCGCCCCCTTCA  
Reverse primer CATGGTGGCGTCTAGACCAAGTGACGATCACAGCGAT  
Primer for sequencing GACTATCATATGCTTACCGT

Subcloning at construction of LentiORF

ITGB3BP\_ORF\_Fw AGACACCGACTCTAGATGCCTTTTGCTCCCGTTG  
ITGB3BP\_ORF\_Rv CCGCGGGCCCTCTAGGTTTAAAATGGCTTTAAGGAAT  
MSL3\_ORF\_Fw AGACACCGACTCTAGATGAGCGCGAGCGAGGGC  
MSL3\_ORF\_Rv CCGCGGGCCCTCTAGATAAAATTGCCCGGGGGTTC  
ZNF498\_ORF\_Fw AGACACCGACTCTAGATGCTTAAAGAGCATCCAGA  
ZNF498\_ORF\_Rv CCGCGGGCCCTCTAGCTGCACCAGCGGCTCCTG  
ZNF691\_ORF\_Fw AGACACCGACTCTAGATGGGCAGTGAGAAGGAG  
ZNF691\_ORF\_Rv CCGCGGGCCCTCTAGGCTGGAATCTTCCCAGC  
TLE2\_ORF\_fwd AGA CAC CGA CTC TAG ATG TAC CCC CAG GGA AGG  
TLE2\_ORF\_Rev CCGCGGGCCCTCTAGAGTAGACCACCTCATACACG  
VPS45\_ORF\_fwd AGACACCGACTCTAGATGAACGTGGTTTTTGCTGT  
VPS45\_ORF\_Rev CCGCGGGCCCTCTAGATCTTCTGCTCGCTGACCT

Primer for RT-PCR

MGAT5\_Fw GTCATCTGCGAGCCTTCT  
MGAT5\_Rv TTGGCAGGTCACCTTGTACTT  
ZNF691\_Fw CTCTGCTGAGTATTACAGGCATTT  
ZNF691\_Rv TCAGGCAGGTGTGGTTCTG  
KIAA0101\_Fw CCCAGAAAGGTGCTTGTT  
KIAA0101\_Rv CCTCGATGAAACTGATGTCG  
MSL3\_Fw GCCACATGCCAACATGAAC  
MSL3\_Rv TCCATCCACCATCTCCTTACA  
GIPC2\_Fw CTTCGCCTGAGATCAAAAGG  
GIPC2\_Rv ATTGCCTTTGCTTTGGTTTC  
ENPP4\_Fw TGTGCTAAATGAATCATCACAAAAAT  
ENPP4\_Rv TTGTAGCCTTTGTGAAATGCAG  
VPS45\_Fw GCTGAAGCTGATGAACAGGA  
VPS45\_Rv TGTGGGTTACAGCAATGTAA  
DUSP7\_Fw TGGACCTAAGAGGGCTGAAA  
DUSP7\_Rv TTTCAATAGCTGCCTGTTTGG  
RBM15\_Fw TGGGAACCCAATAACAGTGG  
RBM15\_Rv TCTTCTACAGTCTCATTGGGAAAA  
PPP4R2\_Fw GTGAGGGACTCCGGGAAG  
PPP4R2\_Rv TGATCCAGGACAGGACAAACT  
STOX2\_Fw GAGAGCCACCCATTCAGC  
STOX2\_Rv TGATCTCTACAGGTGCAGAAACAT  
LMNA\_Fw GGCTAGCTTCTGCTTTTCTGC  
LMNA\_Rv CTGCCTCTCAGGCACCAT  
OR10J5\_Fw AGGCTGTGCTACACAAATGTTC  
OR10J5\_Rv ATAGCGGTCATACCCCATTG  
MYPOP\_Fw CCGCCAAGATCAACGGTAT  
MYPOP\_Rv GTTCCAGCGCTTCTGCAC  
ATPIF1\_Fw GGGCCTTCGGAAAGAGAG  
ATPIF1\_Rv TTCAAAGCTGCCAGTTGTTT  
MAST4\_Fw CCAAGAAGAAAGAAAGTCTCGAA

|             |                             |
|-------------|-----------------------------|
| MAST4_Rv    | CCGATGACAGGGATCTGTTC        |
| RTN2_Fw     | TCAGTCTCGGAACCACGAG         |
| RTN2_Rv     | GGGATGCTCTCCAAGCTGT         |
| TNFSF9_Fw   | TCAGGCTCCGTTTCACTTG         |
| TNFSF9_Rv   | CAGGTCCACGGTCAAAGC          |
| C1orf109_Fw | GACAAGCTAGGGGAAAGGCTA       |
| C1orf109_Rv | TGCTCATAGATCTGAAACACTCG     |
| DBH_Fw      | ATGGAGCTGGGACTGGTGTA        |
| DBH_Rv      | GTGAGGATGAAGGCGGTCT         |
| C9orf64_Fw  | ATTGACAGCGGAGGCGTA          |
| C9orf64_Rv  | TTCAGCTCATGAAGGGCTTT        |
| PRKAG2_Fw   | GCAAAAGGAAGAAAACTTTGTC      |
| PRKAG2_Rv   | TCCCGGTTCTGGTGTCTC          |
| CBX5_Fw     | ATGTTTCAGGCCAAACCACAG       |
| CBX5_Rv     | AAAATCTCAATAAGAAAATCCCAAAA  |
| FGR_Fw      | TGGAAAGATTGGGAGAAAGG        |
| FGR_Rv      | CGCTTTCCCGAATGAGAA          |
| RBPMS_Fw    | TGTGCCCTTAGAAAGCCCTA        |
| RBPMS_Rv    | CACACTTGGCACACAGTTGA        |
| BDKRB1_Fw   | CACGGGATGTAATTC AATGGT      |
| BDKRB1_Rv   | TGCGTCTCATAAATCAGGTGTC      |
| ITGB3BP_Fw  | CCAACAAC TGGAACTTGTC AAA    |
| ITGB3BP_Rv  | GTTAAACTGGGGTGATTCAATTTT    |
| XPA_Fw      | GACACAGGAGGAGGCTTCATT       |
| XPA_Rv      | TCGCATATTACATAATCAAATTCATA  |
| ZNF498_Fw   | CGAGGAGCAGCTCAGTCAG         |
| ZNF498_Rv   | CCTGCAGAACAGGTAGTGCTT       |
| NDUFB6_Fw   | AGAGCTGAGAAGGCGATGG         |
| NDUFB6_Rv   | CATAGGCCCCATCTTCTGTG        |
| CSNK2A2_Fw  | CCATGGAGCACCCATACTTC        |
| CSNK2A2_Rv  | CACAGCATTGTCTGCACAAG        |
| PAN2_Fw     | GGGCTTCATTGGCTATGC          |
| PAN2_Rv     | TCTGACTCCTTGAGTCTGTAGGG     |
| HYDIN_Fw    | ATAACTGAGGAAGTGCCAGAAGAC    |
| HYDIN_Rv    | CTCCATCTGGAGATGAGCACT       |
| PPP4R2_Fw   | GTG AGG GAC TCC GGG AAG     |
| PPP4R2_Rv   | TGA TCC AGG ACA GGA CAA ACT |
| ODF2L_Fw    | CCACGGTGTACCAGTGAAAG        |
| ODF2L_Rv    | CCGCTTCCTTAAGTGTTGCTT       |
| ZNF235_Fw   | AACCCAAAGAGGTAAGCATTCA      |
| ZNF235_Rv   | CTTGATTTGCCAGCATGAAA        |
| FAM175A_Fw  | TGAGAAAAGGAGAGGAGCACACA     |
| FAM175A_Rv  | CCTGAGGGTCTTTTTGGATG        |
| CCT6B_Fw    | TGCCATAAGAGATGGACTTCG       |
| CCT6B_Rv    | TCAGCCATTGCCACTTCA          |
| CRELD2_Fw   | TCCTACACGTGCGAAGAGTG        |
| CRELD2_Rv   | TCGCGTAGCCAGAGATACAC        |
| KIF17_Fw    | GTGTGAGCACATCATGGAGAC       |
| KIF17_Rv    | TTGTTTCATCAGCGTGTAGCC       |
| MAPRL16_Fw  | CGGAGTTTACAGAAGGCAATTT      |
| MAPRL16_Rv  | GATTGTCAGGCGCATCATT         |
| SHMT2_Fw    | GGGAGAAGGACAGGCAGTG         |
| SHMT2_Rv    | ACCCTCCGAGTACTTGTGTTC       |



|              |                                                                     |
|--------------|---------------------------------------------------------------------|
| HS6ST3_Fw    | GCCATCATGGAGAAGAAGGA                                                |
| HS6ST3_Rv    | CCCGTAACATTGTGATGTAATAGAA                                           |
| CES3_Fw      | TTCCCTCATGGGTGTCAACAA                                               |
| CES3_Rv      | TCATCTGCTCCATTGTATCCAG                                              |
| MAPRE2_Fw    | AAGTCTCACCATGCAAACCTCC                                              |
| MAPRE2_Rv    | GGTGTGGATCCTGGTTTAGC                                                |
| TLE2_Fw      | CAGATTATCCCCTTCCTGACC                                               |
| TLE2_Rv      | CTGCTTGGCGCGTTCTAC                                                  |
| KIF11_Fw     | GCCATGCTAGAAGTACATAAGACCT                                           |
| KIF11_Rv     | TCCAAGTGCTACTGTAGTAATGGTATC                                         |
| CTNNBP2_Fw   | CCTGAAGCACAGACAAATGG                                                |
| CTNNBP2_Rv   | TTTCACTGGGATCAGACAAGC                                               |
| CELSR1_Fw    | AGTGCTTCGAGGACTTCACTG                                               |
| CELSR1_Rv    | AGGAGGTATCAAGGAAAGAGCAT                                             |
| CYB561D2_Fw  | CATCTTTGTGGCTGTGCTTG                                                |
| CYB561D2_Rv  | CAGTAGTGCCCTCGGTCATCA                                               |
| C14orf119_Fw | GGTGCCCTTCGAGAGAAAA                                                 |
| C14orf119_Rv | GGGAAGGATAGTGGCATTGA                                                |
| IRF9_Fw      | ATGCAGGCAAGCAGGACTT                                                 |
| IRF9_Rv      | TCCTGTGTCCCCCTCCTTAT                                                |
| UFM1_Fw      | CCCAGATCACCCAGGCTTCTA                                               |
| UFM1_Rv      | CACTTTGCTACCCCCTTCTG                                                |
| CSH1_Fw      | TCCCTGCTCCTGGCTTTT                                                  |
| CSH1_Rv      | GGAGCATAGCGTGGTCAAA                                                 |
| PTRH2_Fw     | AGATCTTTGCAATAAGGAGCTGA                                             |
| PTRH2_Rv     | GCCTCAACGCCTTTACCTCT                                                |
| SRRM2_Fw     | GGCCTAATCCTGACATCCTG                                                |
| SRRM2_Rv     | ATTTGCTGTTCCCTCGTACC                                                |
| CELA2A_Fw    | GTGGTTGGCGGTGAAGAA                                                  |
| CELA2A_Rv    | GGAGCTGTACTGCAGGGAGA                                                |
| ACTB_Fw      | CCAACCGCGAGAAGATGA                                                  |
| ACTB_Rv      | CCAGAGGCGTACAGGGATAG                                                |
| MOB2         | TaqMan(R) Gene Expression Assays, Inventoried ArrayID Hs00364895_m1 |
| MC5R         | TaqMan(R) Gene Expression Assays, Inventoried ArrayID Hs00271882_s1 |

Supplementary Table S5: TRC shRNA clones used for excluding off-target effect.

| gene     |     | TRC shRNA clones |
|----------|-----|------------------|
| MSL3     | sh1 | TRCN0000022104   |
|          | sh2 | TRCN0000022105   |
|          | sh3 | TRCN0000022106   |
| ZNF691   | sh1 | TRCN0000020944   |
|          | sh2 | TRCN0000020948   |
|          | sh3 | TRCN0000020946   |
| VPS45    | sh1 | TRCN0000156836   |
| MOB2     | sh1 | TRCN0000125834   |
|          | sh2 | TRCN0000125835   |
|          | sh3 | TRCN0000125836   |
| DUSP7    | sh1 | TRCN0000007175   |
|          | sh2 | TRCN0000007176   |
|          | sh3 | TRCN0000007177   |
| MAST4    | sh1 | TRCN0000021449   |
|          | sh2 | TRCN0000021450   |
|          | sh3 | TRCN0000021452   |
| MGAT5    | sh1 | TRCN0000036059   |
|          | sh2 | TRCN0000036061   |
|          | sh3 | TRCN0000036062   |
| GIPC2    | sh1 | TRCN0000159402   |
|          | sh2 | TRCN0000159619   |
|          | sh3 | TRCN0000159782   |
| KIAA0101 | sh1 | TRCN0000121547   |
|          | sh2 | TRCN0000122084   |
|          | sh3 | TRCN0000143189   |
| ENPP4    | sh1 | TRCN0000048899   |
|          | sh2 | TRCN0000048900   |
| ITGB3BP  | sh1 | TRCN0000057733   |
|          | sh2 | TRCN0000057734   |
|          | sh3 | TRCN0000057735   |
|          | sh4 | TRCN0000057736   |
| TLE2     | sh1 | TRCN0000019629   |
|          | sh2 | TRCN0000019630   |
|          | sh3 | TRCN0000019631   |
|          | sh4 | TRCN0000019632   |
| ZNF498   | sh1 | TRCN0000107690   |
|          | sh2 | TRCN0000107691   |
|          | sh3 | TRCN0000107692   |
|          | sh4 | TRCN0000107693   |
| PAN2     | sh5 | TRCN0000107694   |
|          | sh1 | TRCN0000004427   |
|          | sh2 | TRCN0000004428   |

|         |     |                |
|---------|-----|----------------|
|         | sh3 | TRCN0000004429 |
|         | sh4 | TRCN0000004430 |
|         | sh5 | TRCN0000010875 |
| CSNK2A2 | sh1 | TRCN0000000611 |
|         | sh2 | TRCN0000000612 |
|         | sh3 | TRCN0000000613 |
|         | sh4 | TRCN0000000614 |
|         | sh5 | TRCN0000000615 |
| NDUFB6  | sh1 | TRCN0000028417 |
|         | sh2 | TRCN0000028448 |
|         | sh3 | TRCN0000028428 |
| ZNF235  | sh1 | TRCN0000013388 |
|         | sh2 | TRCN0000013389 |
|         | sh3 | TRCN0000013390 |
|         | sh4 | TRCN0000013392 |
| XPA     | sh1 | TRCN0000083193 |
|         | sh2 | TRCN0000083194 |
|         | sh3 | TRCN0000083195 |
| ODF2L   | sh1 | TRCN0000121940 |
|         | sh2 | TRCN0000122238 |
|         | sh3 | TRCN0000139780 |
| FAM175A | sh1 | TRCN0000122051 |
|         | sh2 | TRCN0000122344 |
|         | sh3 | TRCN0000139032 |
| HYDIN   | sh1 | TRCN0000128414 |
|         | sh2 | TRCN0000128953 |
|         | sh3 | TRCN0000130229 |
| KIF17   | sh1 | TRCN0000108345 |
|         | sh2 | TRCN0000108346 |
| CCT6B   | sh1 | TRCN0000140500 |
|         | sh2 | TRCN0000142279 |
|         | sh3 | TRCN0000142351 |
| CRELD2  | sh1 | TRCN0000055913 |
|         | sh2 | TRCN0000055915 |
|         | sh3 | TRCN0000055916 |
|         | sh4 | TRCN0000055917 |
| HBA2    | sh1 | TRCN0000029099 |
|         | sh2 | TRCN0000029100 |
|         | sh3 | TRCN0000029101 |
| SHMT2   | sh1 | TRCN0000034804 |
|         | sh2 | TRCN0000034805 |
|         | sh3 | TRCN0000034806 |
| MRPL16  | sh1 | TRCN0000133992 |
|         | sh2 | TRCN0000134265 |
|         | sh3 | TRCN0000135996 |

|        |     |                |
|--------|-----|----------------|
| CES3   | sh1 | TRCN0000046713 |
|        | sh2 | TRCN0000046714 |
|        | sh3 | TRCN0000046715 |
| HS6ST3 | sh1 | TRCN0000036359 |
|        | sh2 | TRCN0000036360 |
|        | sh3 | TRCN0000036361 |
| MAPRE2 | sh1 | TRCN0000116507 |
|        | sh2 | TRCN0000116508 |
|        | sh3 | TRCN0000116509 |

Supplementary Table S6: Gene sets used in this research

Gene set about TGF- $\beta$  pathway

BIOCARTA\_TGFB\_PATHWAY  
COULOUARN\_TEMPORAL\_TGFB1\_SIGNATURE\_UP  
GSE39820\_CTRL\_VS\_TGFBETA1\_IL6\_CD4\_TCELL\_DN  
GSE39820\_CTRL\_VS\_TGFBETA1\_IL6\_IL23A\_CD4\_TCELL\_DN  
GSE39820\_CTRL\_VS\_TGFBETA3\_IL6\_CD4\_TCELL\_UP  
GSE39820\_CTRL\_VS\_TGFBETA3\_IL6\_IL23A\_CD4\_TCELL\_UP  
GSE39820\_TGFBETA1\_IL6\_VS\_TGFBETA1\_IL6\_IL23A\_TREATED\_CD4\_TCELL\_UP  
GSE39820\_TGFBETA1\_VS\_TGFBETA3\_IN\_IL6\_IL23A\_TREATED\_CD4\_TCELL\_UP  
GSE39820\_TGFBETA1\_VS\_TGFBETA3\_IN\_IL6\_TREATED\_CD4\_TCELL\_UP  
GSE39820\_TGFBETA3\_IL6\_VS\_TGFBETA3\_IL6\_IL23A\_TREATED\_CD4\_TCELL\_UP  
GSE7460\_CTRL\_VS\_TGFB\_TREATED\_ACT\_CD8\_TCELL\_UP  
GSE7460\_CTRL\_VS\_TGFB\_TREATED\_ACT\_FOXP3\_HET\_TCONV\_UP  
GSE7460\_CTRL\_VS\_TGFB\_TREATED\_ACT\_FOXP3\_MUT\_TCONV\_UP  
GSE7460\_CTRL\_VS\_TGFB\_TREATED\_ACT\_TCONV\_UP  
GSE7460\_CTRL\_VS\_TGFB\_TREATED\_ACT\_TREG\_UP  
GSE7460\_FOXP3\_MUT\_VS\_WT\_ACT\_WITH\_TGFB\_TCONV\_UP  
GSE7460\_TREG\_VS\_TCONV\_ACT\_WITH\_TGFB\_UP  
GSE7460\_WT\_VS\_FOXP3\_HET\_ACT\_WITH\_TGFB\_TCONV\_UP  
HALLMARK\_TGF\_BETA\_SIGNALING  
JAZAG\_TGFB1\_SIGNALING\_UP  
JAZAG\_TGFB1\_SIGNALING\_VIA\_SMAD4\_UP  
KARAKAS\_TGFB1\_SIGNALING  
KARLSSON\_TGFB1\_TARGETS\_UP  
KEGG\_TGF\_BETA\_SIGNALING\_PATHWAY  
LABBE\_TARGETS\_OF\_TGFB1\_AND\_WNT3A\_UP  
LABBE\_TGFB1\_TARGETS\_UP  
MCBRYAN\_PUBERTAL\_TGFB1\_TARGETS\_UP  
PID\_TGFBR\_PATHWAY  
PLASARI\_TGFB1\_SIGNALING\_VIA\_NFIC\_10HR\_UP  
PLASARI\_TGFB1\_SIGNALING\_VIA\_NFIC\_1HR\_UP  
PLASARI\_TGFB1\_TARGETS\_10HR\_UP  
PLASARI\_TGFB1\_TARGETS\_1HR\_UP  
REACTOME\_DOWNREGULATION\_OF\_TGF\_BETA\_RECEPTOR\_SIGNALING  
REACTOME\_SIGNALING\_BY\_TGF\_BETA\_RECEPTOR\_COMPLEX  
REACTOME\_TGF\_BETA\_RECEPTOR\_SIGNALING\_ACTIVATES\_SMADS  
TGFB\_UP.V1\_UP  
TRANSFORMING\_GROWTH\_FACTOR\_BETA\_RECEPTOR\_SIGNALING\_PATHWAY  
VERRECCHIA\_DELAYED\_RESPONSE\_TO\_TGFB1  
VERRECCHIA\_EARLY\_RESPONSE\_TO\_TGFB1  
VERRECCHIA\_RESPONSE\_TO\_TGFB1\_C1  
VERRECCHIA\_RESPONSE\_TO\_TGFB1\_C2  
VERRECCHIA\_RESPONSE\_TO\_TGFB1\_C5

Gene set about Wnt pathway

BIOCARTA\_WNT\_PATHWAY  
HALLMARK\_WNT\_BETA\_CATENIN\_SIGNALING  
KEGG\_WNT\_SIGNALING\_PATHWAY  
LABBE\_TARGETS\_OF\_TGFB1\_AND\_WNT3A\_UP  
LABBE\_WNT3A\_TARGETS\_UP  
MORF\_WNT1  
PID\_BETA\_CATENIN\_DEG\_PATHWAY  
PID\_BETA\_CATENIN\_NUC\_PATHWAY  
PID\_WNT\_CANONICAL\_PATHWAY  
PID\_WNT\_NONCANONICAL\_PATHWAY  
PID\_WNT\_SIGNALING\_PATHWAY  
REACTOME\_SIGNALING\_BY\_WNT  
SANSOM\_WNT\_PATHWAY\_REQUIRE\_MYC  
ST\_WNT\_BETA\_CATENIN\_PATHWAY  
ST\_WNT\_CA2\_CYCLIC\_GMP\_PATHWAY  
WILLERT\_WNT\_SIGNALING  
WNT\_SIGNALING  
WNT\_UP.V1\_UP

Gene set about Notch pathway

HALLMARK\_NOTCH\_SIGNALING  
KEGG\_NOTCH\_SIGNALING\_PATHWAY  
NGUYEN\_NOTCH1\_TARGETS\_UP  
NOTCH\_DN.V1\_UP  
PID\_NOTCH\_PATHWAY  
REACTOME\_ACTIVATED\_NOTCH1\_TRANSMITS\_SIGNAL\_TO\_THE\_NUCLEUS  
REACTOME\_NOTCH1\_INTRACELLULAR\_DOMAIN\_REGULATES\_TRANSCRIPTION  
REACTOME\_PRE\_NOTCH\_EXPRESSION\_AND\_PROCESSING  
REACTOME\_PRE\_NOTCH\_TRANSCRIPTION\_AND\_TRANSLATION  
REACTOME\_SIGNALING\_BY\_NOTCH  
REACTOME\_SIGNALING\_BY\_NOTCH1  
VILMAS\_NOTCH1\_TARGETS\_UP

Gene set about Hedgehog pathway

HALLMARK\_HEDGEHOG\_SIGNALING  
KEGG\_HEDGEHOG\_SIGNALING\_PATHWAY  
PID\_HEDGEHOG\_2PATHWAY  
PID\_HEDGEHOG\_GLI\_PATHWAY  
YAUCH\_HEDGEHOG\_SIGNALING\_PARACRINE\_UP

## Supplementary Material and Method

### **Stable knockdown and overexpression of target genes**

To establish stable cells that overexpress some target genes, we generated the lentiviral open reading frame (ORF) plasmids by editing the LentiORF plasmids (GE Healthcare Life Science).

First, we purchased the ORF of the target genes from Kazusa RNA Res Inst. Chiba, Japan. We amplified the ORFs by PCR. Cycling parameters were 98°C for 5 minutes, followed by 30 cycles of 98°C for 10 seconds, 63°C for 10 seconds and 72°C for 30 seconds, followed by 72°C for 10 minutes. As a cloning vector, we enzymatically cut precision LentiORF at the XbaI site. We subcloned PCR amplicons into the cloning vector using the InFusion Kit as recommended by the manufacturer, thus generating the lentiviral ORF plasmids. We transfected these into cells as recommended by the manufacturer. Stably transfected cells were selected with blasticidin (10 µg/ml, Thermo Fisher Scientific). All primers are listed in Table S4 and were purchased from Greiner.

### **Gene expression microarray datasets and copy number dataset**

Microarray datasets were obtained from the Gene Expression Omnibus website (<http://www.ncbi.nlm.nih.gov/geo>). The International Cancer Genome Consortium dataset includes 111 samples from 94 HGSOC patients. RNAseq data and patient information were downloaded from the ICGC website. We used datasets GSE2109, TCGA, and GSE3149 to analyze overall survival. To analyze mRNA expression of the primary site and disseminated site, we used the GSE2109 dataset

which contained 75 primary HGSOCs and 43 disseminated HGSOC tumor samples. To analyze the influence of chemotherapy, we used the ICGC and GSE15622 datasets. The ICGC dataset contains 17 paired samples obtained before and after chemotherapy. GSE15622 is a gene expression microarray dataset composed of laparoscopic biopsy specimens from ovarian cancers that were subsequently treated with paclitaxel monotherapy (n=20) or carboplatin monotherapy (n=15). Among them, six patients showed resistance to paclitaxel. To analyze the copy number alterations in the HGSOC samples in TCGA, the cBioPortal for Cancer Genomics database (<http://www.cbioportal.org/public-portal/>) was used.

## **RNA sequencing**

### ***Library preparation and sequencing***

mRNA was converted into a library of template molecules suitable for subsequent cluster generation using the Illumina TruSeq RNA Sample Preparation Kit v2. The first step in the workflow involves purifying the poly-A containing mRNA molecules using poly-T oligo-attached magnetic beads. Following purification, the mRNA is fragmented into small pieces using divalent cations under elevated temperature. The cleaved RNA fragments are copied into first strand cDNA using reverse transcriptase and random primers. This is followed by second strand cDNA synthesis using DNA Polymerase I and RNase H. These cDNA fragments then go through an end repair process, the addition of a single 'A' base, and then ligation of the adapters. The products are then



purified and enriched with PCR to create the final cDNA library. The libraries were sequenced on an Illumina HiSeq 2500 platform in paired-end 100 bp configuration.

### ***Transcriptome analysis***

Adapter and low-quality sequences were removed by cutadapt (v1.2.1) (1). After quality control, poly-A/T sequences were also removed by PRINSEQ (v0.19.2) (2). For gene expression analysis, the trimmed reads were aligned to the reference human genome (GRCh37/hg19) using TopHat (v2.0.13) (3). Mapped reads were assembled by Cufflinks (v2.2.1) (4), and the transcripts across all samples were merged by Cuffmerge, a part of the Cufflinks package. The “fragments per kilobase per million map reads” (FPKM) was calculated with Cuffquant, and differential expression analysis (calculating fold change and testing the statistical significance) between samples was performed with Cuffdiff (Cuffquant and Cuffdiff are programs involved in the Cufflinks package).

### **Western Blotting**

Nuclear protein was extracted using NE-PER Nuclear and Cytoplasmic Extraction Reagents (Thermo Fisher Scientific) according to the manufacturer’s protocol. Western blotting was performed as previously described<sup>13</sup>. Primary antibodies included anti-phospho smad3C rabbit polyclonal antibody (1:1000, Immuno-Biology Laboratories, Gunma, Japan), anti-beta catenin rabbit monoclonal antibody (1:1,000, Cell Signal Technology, Danver, USA), anti-TBP rabbit monoclonal antibody (1:1000, Abcam, Cambridge, UK), and anti-GAPDH mouse monoclonal antibody (1:1000,

Abcam). After washing in tris-buffered saline (TBS)-T, the blots were incubated with the appropriate peroxidase-coupled secondary antibody (1:2000; anti-rabbit HRP or anti-mouse HRP, GE Healthcare Life Science). Specific proteins were detected using ECL Plus Western Blotting Reagent (GE Healthcare Life Science). The bands were visualized using the Molecular Imager Gel Doc™XR+ and ChemiDoc™XRS+ Systems with Image Lab 2.0 software (Bio-Rad).

## References

1. Martin M. Cutadapt removes adapter sequences from high-throughput sequencing reads. *EMBnetjournal, North America* 2011; **17**: 10-12.
2. Schmieder R, Edwards R. Quality control and preprocessing of metagenomic datasets. *Bioinformatics* 2011; **27**: 863-864.
3. Trapnell C, Pachter L, Salzberg SL. TopHat: discovering splice junctions with RNA-Seq. *Bioinformatics* 2009; **25**: 1105-1111.
4. Trapnell C, Williams BA, Pertra G, Mortazavi A, Kwan G, van Baren MJ, *et al.* Transcript assembly and quantification by RNA-Seq reveals unannotated transcripts and isoform switching during cell differentiation. *Nat. Biotechnol.* 2010; **28**: 511-515.
